# Supplementary material for: Safety outcomes following COVID-19 vaccination and infection in 5.1 million children in England
Source: PubMed Central journal article supplement (PMC11130197; doi:10.1038/s41467-024-47745-z), 2024-05-27
Supplement: 41467_2024_47745_MOESM1_ESM.pdf [file 41467_2024_47745_MOESM1_ESM.pdf]

## **Supplementary Material**

### **Safety outcomes following COVID-19 vaccination and infection in 5.1 million children in England**

Emma Copland [1], Martina Patone [1], Defne Saatci [1], Lahiru Handunnetthi [2,3], Jennifer Hirst [1], David P J Hunt [4], Nicholas L Mills [5,6], Paul Moss [7], Aziz Sheikh [1,6], Carol AC Coupland [1,8], Anthony Harnden [1], Chris Robertson [9], Julia Hippisley-Cox\* [1]

- 1: Nuffield Department of Primary Health Care Sciences, University of Oxford, UK
2. Centre for Human Genetics, University of Oxford, UK
3. Department of Psychiatry, University of Oxford, UK
- 4: UK Dementia Research Institute, Centre for Clinical Brain Sciences, University of Edinburgh, UK
- 5: BHF/University Centre for Cardiovascular Science, University of Edinburgh, UK
- 6: Usher Institute, University of Edinburgh, UK
7. Institute of Immunology and Immunotherapy, University of Birmingham, UK
- 8: Centre for Academic Primary Care, School of Medicine, University of Nottingham, UK
9. Department of Mathematics and Statistics, University of Strathclyde, Glasgow, UK

**Correspondence to:** Professor Julia Hippisley-Cox, Nuffield Department of Primary Care Health Sciences, Radcliffe Observatory Quarter, Woodstock Road, Oxford

Email: [julia.hippisley-cox@phc.ox.ac.uk](mailto:julia.hippisley-cox@phc.ox.ac.uk)

## Contents

|                                                                                                                                                                                                                                                                                                                                                 |          |
|-------------------------------------------------------------------------------------------------------------------------------------------------------------------------------------------------------------------------------------------------------------------------------------------------------------------------------------------------|----------|
| <b>Supplementary Figures</b> .....                                                                                                                                                                                                                                                                                                              | <b>4</b> |
| <b>Supplementary Figure 1.</b> Risk of serious outcomes following a first or second dose of COVID-19 vaccination with the BNT162b2 vaccine or SARS-CoV-2 infection (prior to vaccination) in male adolescents aged 12-17 years. ....                                                                                                            | 4        |
| <b>Supplementary Figure 2.</b> Risk of serious outcomes following a first or second dose of COVID-19 vaccination with the BNT162b2 vaccine or SARS-CoV-2 infection (prior to vaccination) in female adolescents aged 12-17 years. ....                                                                                                          | 5        |
| <b>Supplementary Figure 3.</b> Risk of serious outcomes following SARS-CoV-2 infection prior to vaccination in male children aged 5-11 years. ....                                                                                                                                                                                              | 6        |
| <b>Supplementary Figure 4.</b> Risk of serious outcomes following SARS-CoV-2 infection prior to vaccination in female children aged 5-11 years. ....                                                                                                                                                                                            | 7        |
| <b>Supplementary Tables</b> .....                                                                                                                                                                                                                                                                                                               | <b>8</b> |
| <b>Supplementary Table 1.</b> Characteristics of young people aged 5-11 years, 12-17 years and 18-24 years receiving either ChAdOx1, BNT162b2 or mRNA-1273 vaccines or testing positive for SARS-CoV-2 in England between 8 <sup>th</sup> December 2020 and 7 <sup>th</sup> August 2022. ....                                                   | 8        |
| <b>Supplementary Table 2.</b> Baseline demographic characteristics of cohort in young people who did not receive any dose of COVID-19 vaccine and did not have a positive SARS-CoV-2 test recorded in England between 8 <sup>th</sup> December 2020 and 7 <sup>th</sup> August 2022, stratified by age group: 5-11, 12-17 and 18-24 years. .... | 11       |
| <b>Supplementary Table 3.</b> Number of patients who were admitted to hospital or died from each outcome in the baseline period or the 1-42 days following vaccination or SARS-CoV-2 positive test.....                                                                                                                                         | 12       |
| <b>Supplementary Table 4.</b> Incidence rate ratios and estimated number of excess events per million for individual outcomes in the 1-42 days following vaccination or a SARS-CoV-2 positive test (before or after vaccination) compared to baseline period in females aged 5-11 and 12-17 years. ....                                         | 17       |
| <b>Supplementary Table 5.</b> Incidence rate ratios and estimated number of excess events per million for individual outcomes in the 1-42 days following vaccination or a SARS-CoV-2 positive test (before or after vaccination) compared to baseline period in males aged 5-11 and 12-17 years.....                                            | 21       |
| <b>Supplementary Table 6.</b> Risks of individual outcomes in the 1-42 days following vaccination or a SARS-CoV-2 positive test (before or after vaccination) compared to baseline period in young people aged 5-11, 12-17 and 18-24 years of white and non-white ethnicity.....                                                                | 25       |
| <b>Supplementary Table 7.</b> Incidence rate ratios and estimated number of excess events per million in pre-specified weekly periods in the 1-42 days following vaccination or a SARS-CoV-2 positive test (before or after vaccination) compared to baseline period in children aged 5-11 years. ....                                          | 37       |
| <b>Supplementary Table 8.</b> Incidence rate ratios and estimated number of excess events per million in pre-specified weekly periods in the 1-42 days following vaccination or a SARS-CoV-2 positive test (before or after vaccination) compared to baseline period in adolescents aged 12-17 years.....                                       | 42       |
| <b>Supplementary Table 9.</b> Incidence rate ratios and estimated number of excess events per million for individual outcomes in the 1-42 days following vaccination or a SARS-CoV-2 positive test (before or after vaccination) compared to baseline period in young adults aged 18-24 years, and stratified by sex. ....                      | 49       |

|                                                                                                                                                                                                                                                                                                                                                                                                 |    |
|-------------------------------------------------------------------------------------------------------------------------------------------------------------------------------------------------------------------------------------------------------------------------------------------------------------------------------------------------------------------------------------------------|----|
| <b>Supplementary Table 10.</b> Characteristics of unvaccinated and vaccinated young people and those testing positive for SARS-CoV-2 aged 5-11, 12-17 and 18-24 years included in the QResearch primary care database in England between 8 <sup>th</sup> December 2020 until 7 <sup>th</sup> August 2022.....                                                                                   | 55 |
| <b>Supplementary Table 11.</b> Incidence rates of individual outcomes (events per 100,000 person-years) in the 1-42 days following vaccination or a SARS-CoV-2 positive test (before or after vaccination) in young people aged 5-11, 12-17 and 18-24 years included in QResearch primary care database in England between 8 <sup>th</sup> December 2020 until 7 <sup>th</sup> August 2022..... | 58 |
| <b>Supplementary Table 12.</b> Characteristics of matched vaccinated and unvaccinated young people aged 5-11, 12-17 and 18-24 years included in matched cohort study included in QResearch primary care database in England between 8 <sup>th</sup> December 2020 until 7 <sup>th</sup> August 2022. ....                                                                                       | 62 |
| <b>Supplementary Table 13.</b> Incidence rate ratios (unadjusted and adjusted for ethnicity, quintile of deprivation and comorbidities) for individual outcomes in the 1-42 days following vaccination compared to matched unvaccinated group in young people aged 5-11, 12-17 and 18-24 years. ....                                                                                            | 64 |

## Supplementary Figures

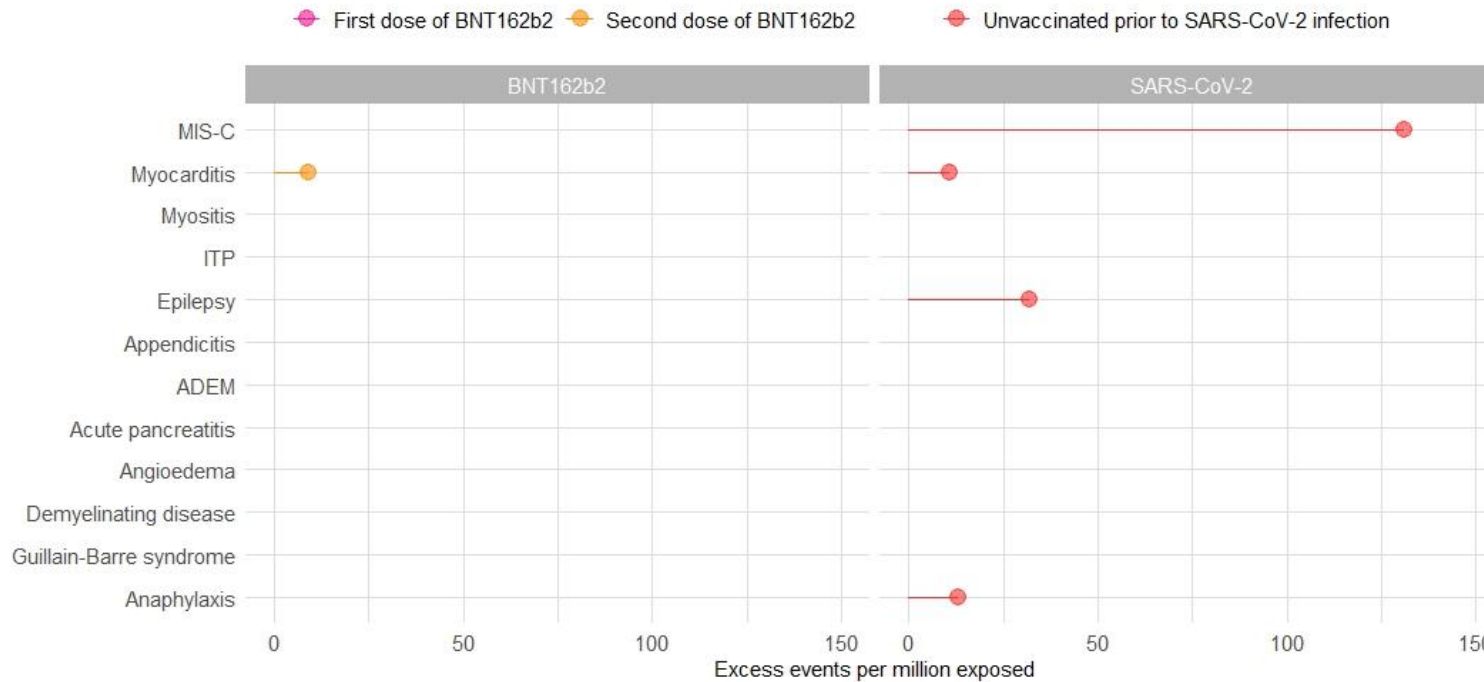

**Supplementary Figure 1.** Risk of serious outcomes following a first or second dose of COVID-19 vaccination with the BNT162b2 vaccine or SARS-CoV-2 infection (prior to vaccination) in male adolescents aged 12-17 years.

Estimated number of excess events per million (95% CI) based on incidence rate ratios of each outcome in the 1-42 days following vaccination or SARS-CoV-2 positive test compared to baseline period are presented where there were at least five events during the exposure period and when number of excess events is greater than zero. Data available from 8th December 2020 and 7th August 2022. MIS-C = multisystem inflammatory syndrome; ITP = idiopathic or immune thrombocytopenic purpura; ADEM = acute disseminated encephalomyelitis.

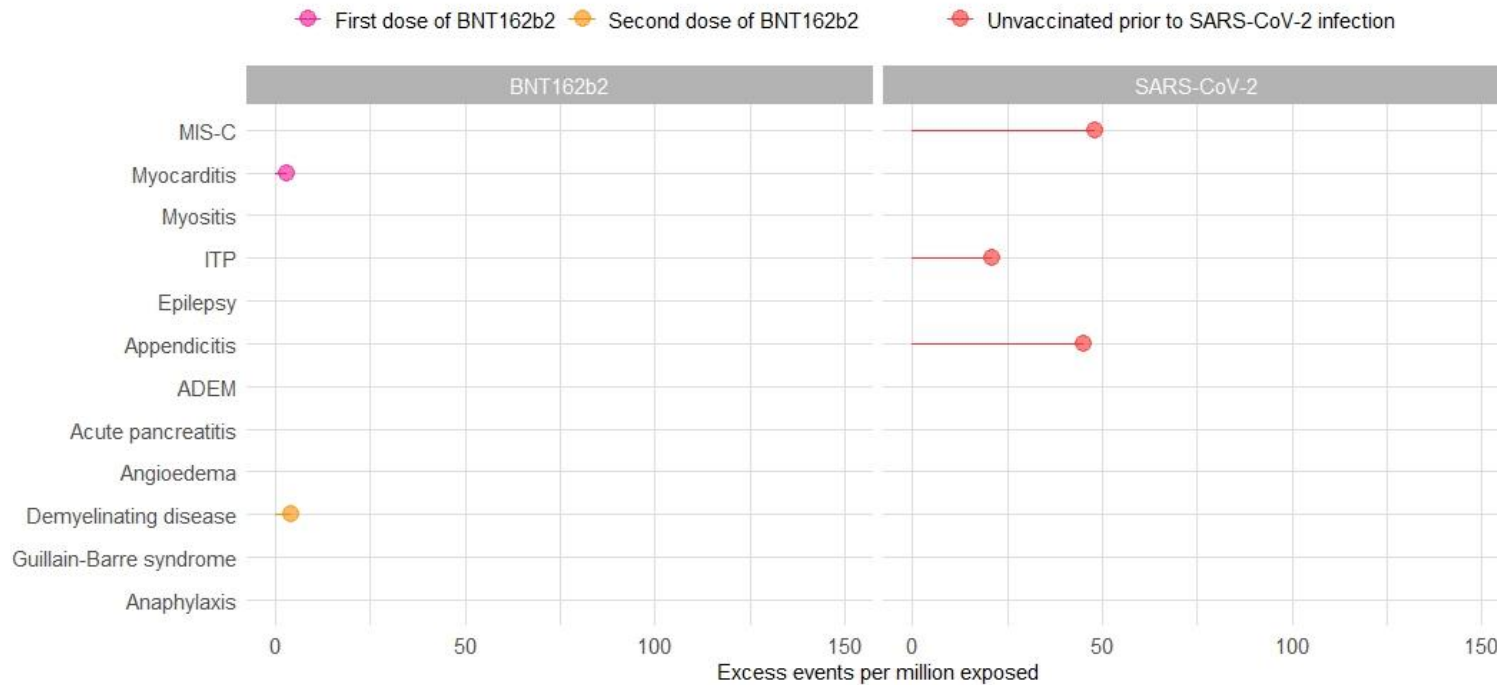

**Supplementary Figure 2.** Risk of serious outcomes following a first or second dose of COVID-19 vaccination with the BNT162b2 vaccine or SARS-CoV-2 infection (prior to vaccination) in female adolescents aged 12-17 years.

Estimated number of excess events per million (95% CI) based on incidence rate ratios of each outcome in the 1-42 days following vaccination or SARS-CoV-2 positive test compared to baseline period are presented where there were at least five events during the exposure period and when number of excess events is greater than zero. Data available from 8th December 2020 and 7th August 2022. MIS-C = multisystem inflammatory syndrome; ITP = idiopathic or immune thrombocytopenic purpura; ADEM = acute disseminated encephalomyelitis.

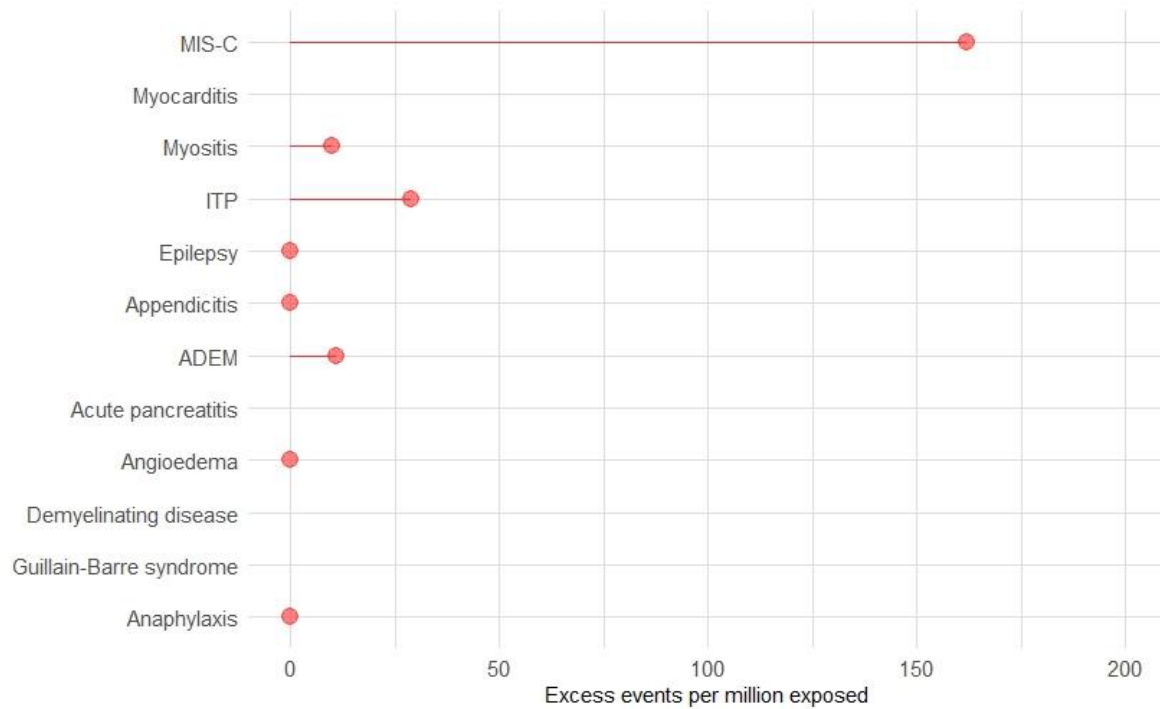

**Supplementary Figure 3.** Risk of serious outcomes following SARS-CoV-2 infection prior to vaccination in male children aged 5-11 years.

Estimated number of excess events per million (95% CI) based on incidence rate ratios of each outcome in the 1-42 days following SARS-CoV-2 positive test compared to baseline period are presented where there were at least five events during the exposure period and when number of excess events is greater than zero. Data available from 8th December 2020 and 7th August 2022. MIS-C = multisystem inflammatory syndrome; ITP = idiopathic or immune thrombocytopenic purpura; ADEM = acute disseminated encephalomyelitis.

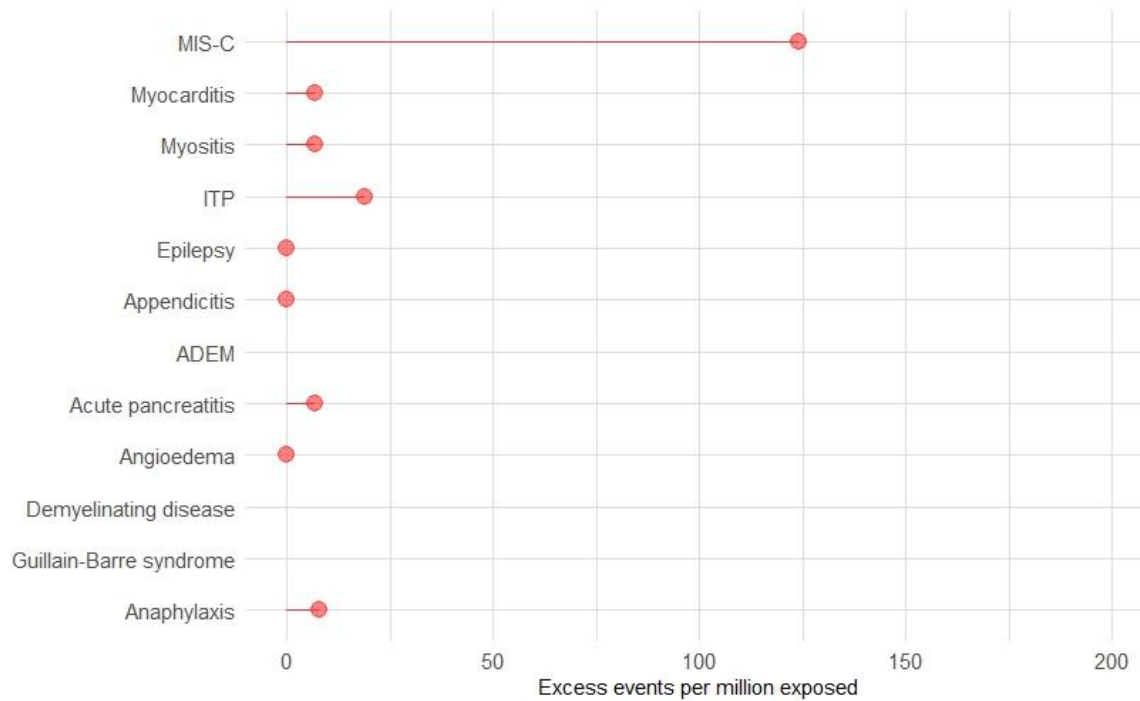

**Supplementary Figure 4.** Risk of serious outcomes following SARS-CoV-2 infection prior to vaccination in female children aged 5-11 years.

Estimated number of excess events per million (95% CI) based on incidence rate ratios of each outcome in the 1-42 days following SARS-CoV-2 positive test compared to baseline period are presented where there were at least five events during the exposure period and when number of excess events is greater than zero. Data available from 8th December 2020 and 7th August 2022. MIS-C = multisystem inflammatory syndrome; ITP = idiopathic or immune thrombocytopenic purpura; ADEM = acute disseminated encephalomyelitis.

## Supplementary Tables

### Supplementary Table 1. Characteristics of young people aged 5-11 years, 12-17 years and 18-24 years receiving either ChAdOx1, BNT162b2 or mRNA-1273

vaccines or testing positive for SARS-CoV-2 in England between 8<sup>th</sup> December 2020 and 7<sup>th</sup> August 2022. Cells with <5 are suppressed. Data are presented as column % (counts).

|                                                            | Dose 1             |                 |           | Dose 2             |                 |           | Dose 3         |            |           | Positive SARS-CoV-2 test |
|------------------------------------------------------------|--------------------|-----------------|-----------|--------------------|-----------------|-----------|----------------|------------|-----------|--------------------------|
|                                                            | ChAdOX1            | BNT162b2        | mRNA-1273 | ChAdOX1            | BNT162b2        | mRNA-1273 | ChAdOX1        | BNT162b2   | mRNA-1273 |                          |
| <b>5-11-year-olds</b>                                      | <b>N = 581,545</b> |                 |           | <b>N = 303,118</b> |                 |           | <b>N = 870</b> |            |           |                          |
| <b>Total N (row %)</b>                                     | 97 (<0.1)          | 581,356 (>99.9) | 92 (<0.1) | 13 (<0.1)          | 303,045 (>99.9) | 60 (<0.1) | 0 (0)          | 870 (100)  | 0 (0)     | 1,508,661                |
| <b>Sex, % (N)</b>                                          |                    |                 |           |                    |                 |           |                |            |           |                          |
| Female                                                     | 45.4 (44)          | 45.3 (263,470)  | 41.3 (38) | 53.8 (7)           | 45.5 (138,018)  | 36.7 (22) | -              | 42.5 (370) | -         | 47.5 (716,227)           |
| Male                                                       | 45.4 (44)          | 47.9 (278,587)  | 47.8 (44) | <5                 | 48.3 (146,372)  | 56.7 (34) | -              | 56.8 (494) | -         | 48.6 (733,779)           |
| Not recorded                                               | 9.3 (9)            | 6.8 (39,299)    | 10.9 (10) | <5                 | 6.2 (18,655)    | <5        | -              | 0.7 (6)    | -         | 3.9 (58,655)             |
| <b>Mean age (SD)</b>                                       | 9.0 (1.7)          | 8.7 (2.0)       | 8.4 (2.1) | 9.3 (1.6)          | 8.8 (2.0)       | 9.5 (1.6) | -              | 9.9 (1.8)  | -         | 8.4 (1.9)                |
| <b>Positive SARS-CoV-2 test during study period, % (N)</b> |                    |                 |           |                    |                 |           |                |            |           |                          |
| None                                                       | 55.7 (54)          | 57.3 (333,392)  | 56.5 (52) | 69.2 (9)           | 55.8 (169,083)  | 46.7 (28) | -              | 50.5 (439) | -         | -                        |
| Prior to first vaccine dose                                | 33.0 (32)          | 41.7 (242,311)  | -         | <5                 | 43.2 (131,001)  | -         | -              | 40.8 (355) | -         | 99.6 (1,502,996)         |
| After first vaccine dose                                   | 11.3 (11)          | 1.0 (5653)      | <5        | <5                 | 1.0 (2961)      | <5        | -              | 8.7 (76)   | -         | 0.4 (5665)               |
| <b>Vaccine status, % (N)</b>                               |                    |                 |           |                    |                 |           |                |            |           |                          |
| No vaccine                                                 | -                  | -               | -         | -                  | -               | -         | -              | -          | -         | 83.6 (1,260,614)         |
| Dose 1                                                     | 100 (97)           | 100 (581,356)   | 100 (92)  | 100 (13)           | 100 (303,045)   | 100 (60)  | -              | 100 (870)  | -         | 16.4 (248047)            |
| Dose 2                                                     | 13.4 (13)          | 52.1 (303,085)  | 21.7 (20) | 100 (13)           | 100 (303,045)   | 100 (60)  | -              | 100 (870)  | -         | 8.9 (133998)             |
| Dose 3                                                     | <5                 | 0.1 (866)       |           | <5                 | 0.3 (865)       | <5        | -              | 100 (870)  | -         | <0.1 (431)               |
| <b>Medical history*</b>                                    |                    |                 |           |                    |                 |           |                |            |           |                          |
| Guillain-Barre syndrome                                    | 0                  | (<5)            | 0         | 0                  | (<5)            | 0         | 0              | 0          | 0         | <0.1 (10)                |
| Appendicitis                                               | (<5)               | 0.1 (697)       | 0         | (<5)               | 0.1 (391)       | 0         | 0              | (<5)       | 0         | 0.1 (1929)               |
| Demyelinating disease                                      | 0                  | <0.1 (28)       | 0         | 0                  | <0.1 (20)       | 0         | 0              | (<5)       | 0         | <0.1 (66)                |
| Myositis                                                   | 0                  | <0.1 (40)       | 0         | 0                  | <0.1 (22)       | 0         | 0              | (<5)       | 0         | <0.1 (86)                |
| Myocarditis                                                | 0                  | <0.1 (5)        | 0         | 0                  | (<5)            | 0         | 0              | (<5)       | 0         | (<5)                     |
| Acute pancreatitis                                         | (<5)               | <0.1 (19)       | 0         | 0                  | <0.1 (13)       | 0         | 0              | 0          | 0         | <0.1 (46)                |
| Immune thrombocytopenia                                    | 0                  | <0.1 (237)      | 0         | 0                  | <0.1 (138)      | 0         | 0              | 1.3 (11)   | 0         | <0.1 (571)               |
| Multisystem inflammatory syndrome                          | 0                  | <0.1 (53)       | 0         | 0                  | <0.1 (27)       | 0         | 0              | (<5)       | 0         | <0.1 (120)               |
| Anaphylaxis                                                | 0                  | <0.1 (88)       | 0         | 0                  | <0.1 (47)       | 0         | 0              | 0          | 0         | <0.1 (269)               |
| Epilepsy                                                   | 5.2 (5)            | 0.4 (2057)      | 0         | (<5)               | 0.4 (1343)      | 0         | 0              | 3.2 (28)   | 0         | 0.2 (3038)               |
| Angioedema                                                 | 0                  | <0.1 (96)       | 0         | 0                  | <0.1 (46)       | 0         | 0              | 0          | 0         | <0.1 (241)               |



|                                                            |                      |                  |                |                      |                  |                |                      |                  |                |                  |
|------------------------------------------------------------|----------------------|------------------|----------------|----------------------|------------------|----------------|----------------------|------------------|----------------|------------------|
| Acute disseminated encephalomyelitis                       | 0                    | <0.1 (53)        | 0              | 0                    | <0.1 (36)        | 0              | 0                    | (<5)             | 0              | <0.1 (118)       |
| <b>12-17-year-olds</b>                                     | <b>N = 2,882,229</b> |                  |                | <b>N = 2,254,214</b> |                  |                | <b>N = 454,868</b>   |                  |                |                  |
| <b>Total N (row %)</b>                                     | 10,245 (0.4)         | 2,870,403 (99.6) | 1581 (<0.1)    | 9190 (0.4)           | 2,240,546 (99.4) | 4478 (0.2)     | 46 (<0.1)            | 399,845 (87.9)   | 54,977 (12.1)  | 1,602,710        |
| <b>Sex, % (N)</b>                                          |                      |                  |                |                      |                  |                |                      |                  |                |                  |
| Female                                                     | 53.5 (5483)          | 47.0 (1,350,157) | 44.4 (702)     | 54.1 (4971)          | 47.7 (1,067,675) | 48.4 (2169)    | 65.2 (30)            | 50.1 (200,221)   | 52.3 (28,733)  | 49.5 (793,332)   |
| Male                                                       | 44.7 (4584)          | 47.1 (1,350,675) | 43.8 (693)     | 44.5 (4093)          | 47.0 (1,051,938) | 43.2 (1936)    | -                    | 46.0 (184,026)   | 43.1 (23,716)  | 45.8 (733,890)   |
| Not recorded                                               | 1.7 (178)            | 5.9 (169,571)    | 11.8 (186)     | 1.4 (126)            | 5.4 (120,933)    | 8.3 (373)      | <5                   | 3.9 (15,598)     | 4.6 (2528)     | 4.7 (75,488)     |
| <b>Mean age (SD)</b>                                       | 16.6 (0.7)           | 14.5 (1.8)       | 15.6 (1.7)     | 16.6 (0.6)           | 14.6 (1.8)       | 16.5 (1.1)     | 16.4 (0.8)           | 16.0 (1.1)       | 17.0 (0.3)     | 14.3 (1.7)       |
| <b>Positive SARS-CoV-2 test during study period, % (N)</b> |                      |                  |                |                      |                  |                |                      |                  |                |                  |
| None                                                       | 63.0 (6456)          | 60.8 (1,745,591) | 63.8 (1009)    | 62.6 (5756)          | 61.3 (1,373,622) | 60.5 (2708)    | 69.6 (32)            | 65.4 (261,447)   | 61.9 (34,039)  | -                |
| Prior to first vaccine dose                                | 4.5 (456)            | 20.8 (597,636)   | 24.4 (385)     | 4.3 (395)            | 20.2 (452,711)   | 20.7 (928)     | <5                   | 12.1 (48,486)    | 11.4 (6278)    | 66.9 (1,072,014) |
| After first vaccine dose                                   | 32.5 (3333)          | 18.4 (527,176)   | 11.8 (187)     | 33.1 (3039)          | 18.5 (414,213)   | 18.8 (842)     | -                    | 22.5 (89,912)    | 26.7 (14,660)  | 33.1 (530,696)   |
| <b>Vaccine status, % (N)</b>                               |                      |                  |                |                      |                  |                |                      |                  |                |                  |
| No vaccine                                                 | -                    | -                | -              | -                    | -                | -              | -                    | -                | -              | 29.5 (473,537)   |
| Dose 1                                                     | 100 (10,245)         | 100 (2,870,403)  | 100 (1581)     | 100 (9190)           | 100 (2,240,546)  | 100 (4478)     | 100 (46)             | 100 (399,845)    | 100 (54,977)   | 70.5 (1,129,173) |
| Dose 2                                                     | 95.7 (9801)          | 78.2 (2,243,498) | 57.9 (915)     | 100 (9190)           | 100 (2,240,546)  | 100 (4478)     | 100 (46)             | 100 (399,845)    | 100 (54,977)   | 54.4 (872,128)   |
| Dose 3                                                     | 70.3 (7198)          | 15.6 (447,431)   | 15.1 (239)     | 75.5 (6936)          | 20.0 (447,329)   | 13.5 (603)     | 100 (46)             | 100 (399,845)    | 100 (54,977)   | 9.9 (159,350)    |
| <b>Medical history*</b>                                    |                      |                  |                |                      |                  |                |                      |                  |                |                  |
| Guillain-Barre syndrome                                    | (<5)                 | <0.1 (34)        | 0              | (<5)                 | <0.1 (31)        | 0              | 0                    | <0.1 (5)         | 0              | <0.1 (25)        |
| Appendicitis                                               | 0.3 (27)             | 0.2 (7000)       | (<5)           | 0.3 (23)             | 0.2 (5550)       | 0.2 (7)        | (<5)                 | 0.3 (1037)       | 0.2 (125)      | 0.3 (4141)       |
| Demyelinating disease                                      | (<5)                 | <0.1 (158)       | 0              | (<5)                 | <0.1 (125)       | 0              | 0                    | <0.1 (55)        | <0.1 (5)       | <0.1 (82)        |
| Myositis                                                   | (<5)                 | <0.1 (141)       | 0              | (<5)                 | <0.1 (114)       | 0              | 0                    | <0.1 (37)        | (<5)           | <0.1 (68)        |
| Myocarditis                                                | (<5)                 | <0.1 (34)        | 0              | (<5)                 | <0.1 (31)        | 0              | 0                    | <0.1 (16)        | (<5)           | <0.1 (15)        |
| Acute pancreatitis                                         | <0.1 (5)             | <0.1 (215)       | 0              | 0.1 (5)              | <0.1 (173)       | 0              | 0                    | <0.1 (68)        | (<5)           | <0.1 (121)       |
| Immune thrombocytopenia                                    | 0.4 (36)             | <0.1 (689)       | 0              | 0.3 (30)             | <0.1 (578)       | (<5)           | 0                    | 0.1 (290)        | <0.1 (21)      | <0.1 (443)       |
| Multisystem inflammatory syndrome                          | 0                    | <0.1 (76)        | 0              | 0                    | <0.1 (60)        | 0              | 0                    | <0.1 (15)        | (<5)           | <0.1 (36)        |
| Anaphylaxis                                                | 0.1 (8)              | <0.1 (469)       | (<5)           | 0.1 (8)              | <0.1 (374)       | (<5)           | 0                    | <0.1 (108)       | <0.1 (15)      | <0.1 (314)       |
| Epilepsy                                                   | 2.7 (275)            | 0.2 (5462)       | 0.6 (9)        | 2.7 (252)            | 0.2 (4576)       | 0.2 (8)        | (<5)                 | 0.6 (2408)       | 0.2 (135)      | 0.2 (2644)       |
| Angioedema                                                 | 0.1 (7)              | <0.1 (361)       | 0              | 0.1 (7)              | <0.1 (301)       | (<5)           | (<5)                 | <0.1 (85)        | <0.1 (10)      | <0.1 (239)       |
| Acute disseminated encephalomyelitis                       | (<5)                 | <0.1 (156)       | 0              | (<5)                 | <0.1 (133)       | 0              | 0                    | <0.1 (47)        | <0.1 (6)       | <0.1 (80)        |
| <b>18-24-year-olds</b>                                     | <b>N = 4,032,245</b> |                  |                | <b>N = 3,653,947</b> |                  |                | <b>N = 2,242,065</b> |                  |                |                  |
| <b>Total N (row %)</b>                                     | 545,345 (13.5)       | 3,131,742 (77.7) | 355,158 (8.8)  | 520,252 (14.2)       | 2,823,984 (77.2) | 309,711 (8.5)  | 2006 (<0.1)          | 1,502,039 (67.0) | 738,020 (32.9) | 1,551,955        |
| <b>Sex, % (N)</b>                                          |                      |                  |                |                      |                  |                |                      |                  |                |                  |
| Female                                                     | 54.8 (298,600)       | 41.7 (1,305,033) | 36.4 (129,164) | 54.8 (285,157)       | 43.2 (1,219,114) | 38.8 (120,213) | 50.2 (1007)          | 48.7 (731,211)   | 45.8 (338,072) | 48.8 (757,840)   |
| Male                                                       | 37.7 (205,505)       | 40.1 (1,256,385) | 41.6 (147,710) | 37.6 (195,831)       | 40.7 (1,149,488) | 43.4 (134,271) | 30.4 (609)           | 38.8 (582,712)   | 41.4 (305,371) | 37.5 (582,258)   |

|                                                            |                |                  |                |                |                  |                |              |                   |                 |                  |
|------------------------------------------------------------|----------------|------------------|----------------|----------------|------------------|----------------|--------------|-------------------|-----------------|------------------|
| Not recorded                                               | 7.6 (41,240)   | 18.2 (570,324)   | 22.0 (78,284)  | 7.5 (39,264)   | 16.1 (455,382)   | 17.8 (55,227)  | 19.4 (390)   | 12.5 (188,116)    | 12.8 (94,577)   | 13.7 (211,857)   |
| <b>Mean age (SD)</b>                                       | 21.3 (2.0)     | 21.0 (2.0)       | 21.0 (2.0)     | 21.3 (2.0)     | 21.0 (2.0)       | 21.0 (2.0)     | 21.5 (1.9)   | 21.1 (2.0)        | 21.0 (2.0)      | 21.0 (2.0)       |
| <b>Positive SARS-CoV-2 test during study period, % (N)</b> |                |                  |                |                |                  |                |              |                   |                 |                  |
| None                                                       | 65.2 (355,451) | 69.8 (2,187,453) | 71.2 (252,922) | 65.0 (338,095) | 69.3 (1,955,645) | 70.2 (217,315) | 66.4 (1332)  | 68.7 (1,032,501)  | 69.0 (508,868)  |                  |
| Prior to first vaccine dose                                | 6.2 (33,649)   | 8.4 (262,326)    | 10.3 (36,441)  | 6.2 (32,117)   | 7.9 (223,345)    | 9.8 (30,346)   | 5.2 (105)    | 5.9 (88,739)      | 6.6 (48,350)    | 41.8 (647,952)   |
| After first vaccine dose                                   | 28.7 (156,245) | 21.8 (681,963)   | 18.5 (65,795)  | 28.8 (150,040) | 22.8 (644,994)   | 20.0 (62,050)  | 28.4 (569)   | 25.4 (380,799)    | 24.5 (180,802)  | 58.2 (904,003)   |
| <b>Vaccine status, % (N)</b>                               |                |                  |                |                |                  |                |              |                   |                 |                  |
| No vaccine                                                 | -              | -                | -              | -              | -                | -              | -            | -                 | -               | 20.3 (315,536)   |
| Dose 1                                                     | 100 (545,345)  | 100 (3,131,742)  | 100 (355,158)  | 100 (520,252)  | 100 (2,823,984)  | 100 (309,711)  | 100 (2006)   | 100 (1,502,039)   | 100 (738,020)   | 79.7 (1,236,419) |
| Dose 2                                                     | 97.0 (529,053) | 90.2 (2,825,234) | 84.4 (299,660) | 100 (520,252)  | 100 (2,823,984)  | 100 (309,711)  | >99.9 (2005) | >99.9 (1,501,896) | >99.9 (737,902) | 73.6 (1,142,892) |
| Dose 3                                                     | 70.8 (385,849) | 54.0 (1,691,598) | 46.4 (164,618) | 73.8 (384,039) | 59.9 (1,692,725) | 53.3 (165,039) | 100 (2006)   | 100 (1,502,039)   | 100 (738,020)   | 45.1 (699,364)   |
| <b>Medical history*</b>                                    |                |                  |                |                |                  |                |              |                   |                 |                  |
| Guillain-Barre syndrome                                    | <0.1 (43)      | <0.1 (51)        | <0.1 (6)       | <0.1 (36)      | <0.1 (49)        | <0.1 (7)       | 0            | <0.1 (44)         | <0.1 (15)       | <0.1 (53)        |
| Appendicitis                                               | 0.3 (1436)     | 0.2 (6749)       | 0.2 (727)      | 0.3 (1365)     | 0.2 (6250)       | 0.2 (680)      | 0.4 (8)      | 0.2 (3543)        | 0.2 (1752)      | 0.2 (3780)       |
| Demyelinating disease                                      | <0.1 (151)     | <0.1 (154)       | <0.1 (11)      | <0.1 (139)     | <0.1 (148)       | <0.1 (10)      | 0            | <0.1 (149)        | <0.1 (55)       | <0.1 (116)       |
| Myositis                                                   | <0.1 (52)      | <0.1 (70)        | <0.1 (5)       | <0.1 (48)      | <0.1 (65)        | <0.1 (8)       | 0            | <0.1 (65)         | <0.1 (13)       | <0.1 (59)        |
| Myocarditis                                                | <0.1 (102)     | <0.1 (215)       | <0.1 (22)      | <0.1 (96)      | <0.1 (202)       | <0.1 (19)      | (<5)         | <0.1 (139)        | <0.1 (53)       | <0.1 (129)       |
| Acute pancreatitis                                         | 0.1 (371)      | <0.1 (753)       | <0.1 (63)      | 0.1 (339)      | <0.1 (697)       | <0.1 (56)      | (<5)         | <0.1 (471)        | <0.1 (195)      | <0.1 (498)       |
| Immune thrombocytopenia                                    | 0.1 (498)      | <0.1 (712)       | <0.1 (56)      | 0.1 (446)      | <0.1 (670)       | <0.1 (49)      | 0.3 (6)      | <0.1 (579)        | <0.1 (156)      | <0.1 (530)       |
| Multisystem inflammatory syndrome                          | <0.1 (14)      | <0.1 (34)        | 0              | <0.1 (12)      | <0.1 (34)        | 0              | 0            | <0.1 (27)         | <0.1 (6)        | <0.1 (23)        |
| Anaphylaxis                                                | <0.1 (253)     | <0.1 (486)       | <0.1 (60)      | <0.1 (233)     | <0.1 (446)       | <0.1 (53)      | 0.3 (7)      | <0.1 (334)        | <0.1 (128)      | <0.1 (365)       |
| Epilepsy                                                   | 0.9 (5129)     | 0.1 (3266)       | <0.1 (164)     | 0.9 (4838)     | 0.1 (3020)       | <0.1 (137)     | 1.5 (31)     | 0.3 (4402)        | 0.2 (1377)      | 0.2 (3072)       |
| Angioedema                                                 | <0.1 (221)     | <0.1 (470)       | <0.1 (42)      | <0.1 (211)     | <0.1 (428)       | <0.1 (37)      | 0.4 (8)      | <0.1 (284)        | <0.1 (132)      | <0.1 (371)       |
| Acute disseminated encephalomyelitis                       | <0.1 (84)      | <0.1 (83)        | <0.1 (6)       | <0.1 (74)      | <0.1 (76)        | <0.1 (5)       | 0            | <0.1 (93)         | <0.1 (20)       | <0.1 (61)        |

\*Defined as hospital admission with ICD-10 code for condition in two years prior to study start date.

**Supplementary Table 2.** Baseline demographic characteristics of cohort in young people who did not receive any dose of COVID-19 vaccine and did not have a positive SARS-CoV-2 test recorded in England between 8<sup>th</sup> December 2020 and 7<sup>th</sup> August 2022, stratified by age group: 5-11, 12-17 and 18-24 years. Cells with <5 are suppressed. Data are presented as column % (counts).

|                                                                      | 5-11 years     | 12-17 years    | 18-24 years    |
|----------------------------------------------------------------------|----------------|----------------|----------------|
| <b>Total N</b>                                                       | 248,047        | 1,129,173      | 1,236,419      |
| <b>Age, mean (SD)</b>                                                | 9.1 (1.8)      | 14.4 (1.7)     | 20.9 (1.9)     |
| <b>Sex, % (N)</b>                                                    |                |                |                |
| Female                                                               | 47.1 (116,710) | 50.4 (568,925) | 51.0 (631,011) |
| Male                                                                 | 48.7 (120,895) | 45.6 (514,362) | 36.9 (455,687) |
| Not recorded                                                         | 4.2 (10,442)   | 4.1 (45,886)   | 12.1 (149,721) |
| <b>Ethnicity, % (N)</b>                                              |                |                |                |
| White                                                                | 76.5 (189,670) | 75.0 (846,444) | 59.8 (739,281) |
| Indian                                                               | 4.1 (10,120)   | 2.5 (27,704)   | 1.6 (19,573)   |
| Pakistani                                                            | 0.9 (2230)     | 1.5 (17,080)   | 1.6 (19,257)   |
| Bangladeshi                                                          | 0.4 (1101)     | 0.6 (6459)     | 0.6 (7670)     |
| Other Asian                                                          | 1.6 (3920)     | 1.3 (14,700)   | 0.9 (11,716)   |
| Black Caribbean                                                      | 0.1 (248)      | 0.2 (2689)     | 0.4 (5059)     |
| Black African                                                        | 0.6 (1565)     | 0.9 (10,410)   | 0.9 (11,157)   |
| Chinese                                                              | 0.6 (1577)     | 0.4 (4107)     | 0.2 (2701)     |
| Other                                                                | 4.2 (10,483)   | 3.4 (38,921)   | 2.8 (34,942)   |
| Not recorded                                                         | 10.9 (27,133)  | 14.2 (160,659) | 31.1 (385,063) |
| <b>Medical history in two years prior to study start date, % (N)</b> |                |                |                |
| Guillain-Barre syndrome                                              | <5             | <0.1 (16)      | <0.1 (43)      |
| Appendicitis                                                         | 0.1 (348)      | 0.3 (3008)     | 0.3 (3127)     |
| Demyelinating disease                                                | <0.1 (14)      | <0.1 (55)      | <0.1 (98)      |
| Myositis                                                             | <0.1 (13)      | <0.1 (45)      | <0.1 (52)      |
| Myocarditis                                                          | <5             | <0.1 (11)      | <0.1 (104)     |
| Acute pancreatitis                                                   | <0.1 (6)       | <0.1 (85)      | <0.1 (410)     |
| Idiopathic or immune thrombocytopenia                                | <0.1 (109)     | <0.1 (297)     | <0.1 (422)     |
| Multisystem inflammatory syndrome                                    | <0.1 (15)      | <0.1 (27)      | <0.1 (17)      |
| Anaphylaxis                                                          | <0.1 (37)      | <0.1 (213)     | <0.1 (283)     |
| Epilepsy                                                             | 0.3 (779)      | 0.2 (1922)     | 0.2 (2533)     |
| Angioedema                                                           | <0.1 (34)      | <0.1 9160)     | <0.1 (284)     |
| Acute disseminated encephalomyelitis                                 | <0.1 (31)      | <0.1 (56)      | <0.1 (46)      |

**Supplementary Table 3.** Number of patients who were admitted to hospital or died from each outcome in the baseline period or the 1-42 days following vaccination or SARS-CoV-2 positive test. Cells with <5 are suppressed. Data are presented as counts (column %).

|                                              | Positive SARS-CoV-2 test |                    |                   | COVID-19 vaccines |                  |        |        |                   |        |        |                 |        |
|----------------------------------------------|--------------------------|--------------------|-------------------|-------------------|------------------|--------|--------|-------------------|--------|--------|-----------------|--------|
|                                              | Baseline                 | Before vaccination | After vaccination | Baseline          | BNT162b2 vaccine |        |        | mRNA-1273 vaccine |        |        | ChAdOX1 vaccine |        |
|                                              |                          |                    |                   |                   | Dose 1           | Dose 2 | Dose 3 | Dose 1            | Dose 2 | Dose 3 | Dose 1          | Dose 2 |
| <b>Multisystem inflammatory syndrome</b>     |                          |                    |                   |                   |                  |        |        |                   |        |        |                 |        |
| <b>5-11 years</b>                            |                          |                    |                   |                   |                  |        |        |                   |        |        |                 |        |
| Total number of patients hospitalised        | 163                      | 226                | 0                 | 138               | <5               | 0      | 0      | 0                 | 0      | 0      | 0               | 0      |
| Recorded in death certificate                | 0                        | 0                  | 0                 | 0                 | 0                | 0      | 0      | 0                 | 0      | 0      | 0               | 0      |
| Death within 28 days of hospital admission   | 0                        | 0                  | 0                 | 0                 | 0                | 0      | 0      | 0                 | 0      | 0      | 0               | 0      |
| <b>12-17 years</b>                           |                          |                    |                   |                   |                  |        |        |                   |        |        |                 |        |
| Number of patients hospitalised              | 78                       | 98                 | <5                | 208               | 21               | <5     | <5     | 0                 | 0      | 0      | 0               | 0      |
| Recorded in death certificate                | 0                        | 0                  | 0                 | 0                 | 0                | 0      | 0      | 0                 | 0      | 0      | 0               | 0      |
| Death within 28 days of hospital admission   | 0                        | 0                  | 0                 | 0                 | 0                | 0      | 0      | 0                 | 0      | 0      | 0               | 0      |
| <b>18-24 years</b>                           |                          |                    |                   |                   |                  |        |        |                   |        |        |                 |        |
| Number of patients hospitalised              | 23                       | 5                  | <5                | 39                | <5               | <5     | 0      | 0                 | 0      | 0      | <5              | <5     |
| Recorded in death certificate                | 0                        | 0                  | 0                 | 0                 | 0                | 0      | 0      | 0                 | 0      | 0      | 0               | 0      |
| Death within 28 days of hospital admission   | 0                        | 0                  | 0                 | 0                 | 0                | 0      | 0      | 0                 | 0      | 0      | 0               | 0      |
| <b>Myocarditis</b>                           |                          |                    |                   |                   |                  |        |        |                   |        |        |                 |        |
| <b>5-11 years</b>                            |                          |                    |                   |                   |                  |        |        |                   |        |        |                 |        |
| Number of patients hospitalised              | 5                        | 6                  | 0                 | <5                | 0                | 0      | 0      | 0                 | 0      | 0      | 0               | 0      |
| Recorded in death certificate                | 0                        | <5                 | 0                 | 0                 | 0                | 0      | 0      | 0                 | 0      | 0      | 0               | 0      |
| Death within 28 days of hospital admission   | 0                        | 0                  | 0                 | 0                 | 0                | 0      | 0      | 0                 | 0      | 0      | 0               | 0      |
| <b>12-17 years</b>                           |                          |                    |                   |                   |                  |        |        |                   |        |        |                 |        |
| Number of patients hospitalised              | 62                       | 7                  | <5                | 80                | 19               | 17     | <5     | 0                 | 0      | <5     | <5              | 0      |
| Recorded in death certificate                | 0                        | 0                  | 0                 | 0                 | 0                | 0      | 0      | 0                 | 0      | 0      | 0               | 0      |
| Death within 28 days of hospital admission   | 0                        | 0                  | 0                 | 0                 | 0                | 0      | 0      | 0                 | 0      | 0      | 0               | 0      |
| <b>18-24 years</b>                           |                          |                    |                   |                   |                  |        |        |                   |        |        |                 |        |
| Number of patients hospitalised              | 189                      | 19                 | <5                | 318               | 26               | 49     | 27     | 9                 | 29     | 13     | 5               | 9      |
| Recorded in death certificate                | <5                       | 0                  | 0                 | <5                | 0                | 0      | <5     | 0                 | 0      | 0      | 0               | 0      |
| Death within 28 days of hospital admission   | 0                        | 0                  | 0                 | 0                 | 0                | 0      | 0      | 0                 | 0      | 0      | 0               | 0      |
| <b>Idiopathic or immune thrombocytopenia</b> |                          |                    |                   |                   |                  |        |        |                   |        |        |                 |        |
| <b>5-11 years</b>                            |                          |                    |                   |                   |                  |        |        |                   |        |        |                 |        |
| Number of patients hospitalised              | 360                      | 61                 | 0                 | 151               | 10               | <5     | 0      | 0                 | 0      | 0      | 0               | 0      |
| Recorded in death certificate                | 0                        | 0                  | 0                 | 0                 | 0                | 0      | 0      | 0                 | 0      | 0      | 0               | 0      |
| Death within 28 days of hospital admission   | 0                        | 0                  | 0                 | 0                 | 0                | 0      | 0      | 0                 | 0      | 0      | 0               | 0      |
| <b>12-17 years</b>                           |                          |                    |                   |                   |                  |        |        |                   |        |        |                 |        |
| Number of patients hospitalised              | 399                      | 37                 | 6                 | 571               | 41               | 31     | 10     | 0                 | 0      | <5     | <5              | <5     |

|                                            |      |     |    |      |     |     |     |    |    |    |     |     |
|--------------------------------------------|------|-----|----|------|-----|-----|-----|----|----|----|-----|-----|
| Recorded in death certificate              | 0    | 0   | 0  | 0    | 0   | 0   | 0   | 0  | 0  | 0  | 0   | 0   |
| Death within 28 days of hospital admission | <5   | 0   | 0  | <5   | 0   | 0   | 0   | 0  | 0  | 0  | 0   | 0   |
| <b>18-24 years</b>                         |      |     |    |      |     |     |     |    |    |    |     |     |
| Number of patients hospitalised            | 502  | 58  | 15 | 963  | 58  | 55  | 32  | <5 | 6  | 12 | 40  | 29  |
| Recorded in death certificate              | 0    | 0   | 0  | 0    | 0   | 0   | 0   | 0  | 0  | 0  | 0   | 0   |
| Death within 28 days of hospital admission | 0    | 0   | 0  | 0    | 0   | 0   | 0   | 0  | 0  | 0  | 0   | 0   |
| <b>Epilepsy</b>                            |      |     |    |      |     |     |     |    |    |    |     |     |
| <b>5-11 years</b>                          |      |     |    |      |     |     |     |    |    |    |     |     |
| Number of patients hospitalised            | 1275 | 100 | <5 | 780  | 61  | 27  | 0   | 0  | 0  | 0  | 0   | 0   |
| Recorded in death certificate              | 0    | 0   | 0  | 0    | 0   | 0   | 0   | 0  | 0  | 0  | 0   | 0   |
| Death within 28 days of hospital admission | 0    | 0   | 0  | 0    | 0   | 0   | 0   | 0  | 0  | 0  | 0   | 0   |
| <b>12-17 years</b>                         |      |     |    |      |     |     |     |    |    |    |     |     |
| Number of patients hospitalised            | 1375 | 77  | 22 | 2337 | 215 | 190 | 48  | 0  | <5 | 6  | 15  | 9   |
| Recorded in death certificate              | 0    | 0   | 0  | 0    | 0   | 0   | 0   | 0  | 0  | 0  | 0   | 0   |
| Death within 28 days of hospital admission | 0    | 0   | 0  | 0    | 0   | 0   | 0   | 0  | 0  | 0  | 0   | 0   |
| <b>18-24 years</b>                         |      |     |    |      |     |     |     |    |    |    |     |     |
| Number of patients hospitalised            | 1863 | 83  | 42 | 3946 | 168 | 156 | 172 | 7  | 6  | 40 | 215 | 210 |
| Recorded in death certificate              | 0    | 0   | 0  | 0    | 0   | 0   | 0   | 0  | 0  | 0  | 0   | 0   |
| Death within 28 days of hospital admission | 0    | 0   | 0  | 0    | 0   | 0   | 0   | 0  | 0  | 0  | 0   | 0   |
| <b>Acute pancreatitis</b>                  |      |     |    |      |     |     |     |    |    |    |     |     |
| <b>5-11 years</b>                          |      |     |    |      |     |     |     |    |    |    |     |     |
| Number of patients hospitalised            | 38   | 9   | 0  | 17   | <5  | 0   | 0   | 0  | 0  | 0  | 0   | 0   |
| Recorded in death certificate              | 0    | 0   | 0  | 0    | 0   | 0   | 0   | 0  | 0  | 0  | 0   | 0   |
| Death within 28 days of hospital admission | 0    | 0   | 0  | 0    | 0   | 0   | 0   | 0  | 0  | 0  | 0   | 0   |
| <b>12-17 years</b>                         |      |     |    |      |     |     |     |    |    |    |     |     |
| Number of patients hospitalised            | 142  | 7   | <5 | 207  | 28  | 10  | 5   | 0  | 0  | 0  | <5  | 0   |
| Recorded in death certificate              | 0    | 0   | 0  | 0    | 0   | 0   | 0   | 0  | 0  | 0  | 0   | 0   |
| Death within 28 days of hospital admission | 0    | 0   | 0  | 0    | 0   | 0   | 0   | 0  | 0  | 0  | 0   | 0   |
| <b>18-24 years</b>                         |      |     |    |      |     |     |     |    |    |    |     |     |
| Number of patients hospitalised            | 495  | 30  | 6  | 934  | 70  | 63  | 39  | 8  | 5  | 13 | 10  | 26  |
| Recorded in death certificate              | 0    | 0   | 0  | 0    | 0   | 0   | 0   | 0  | 0  | 0  | 0   | 0   |
| Death within 28 days of hospital admission | 0    | 0   | 0  | 0    | 0   | 0   | 0   | 0  | 0  | 0  | 0   | 0   |
| <b>Myositis</b>                            |      |     |    |      |     |     |     |    |    |    |     |     |
| <b>5-11 years</b>                          |      |     |    |      |     |     |     |    |    |    |     |     |
| Number of patients hospitalised            | 51   | 15  | 0  | 21   | <5  | 0   | 0   | 0  | 0  | 0  | 0   | 0   |
| Recorded in death certificate              | 0    | 0   | 0  | 0    | 0   | 0   | 0   | 0  | 0  | 0  | 0   | 0   |
| Death within 28 days of hospital admission | 0    | 0   | 0  | 0    | 0   | 0   | 0   | 0  | 0  | 0  | 0   | 0   |
| <b>12-17 years</b>                         |      |     |    |      |     |     |     |    |    |    |     |     |
| Number of patients hospitalised            | 48   | <5  | 0  | 70   | 7   | <5  | <5  | 0  | 0  | 0  | 0   | <5  |

|                                             |     |    |    |     |    |    |    |    |    |    |    |    |
|---------------------------------------------|-----|----|----|-----|----|----|----|----|----|----|----|----|
| Recorded in death certificate               | 0   | 0  | 0  | 0   | 0  | 0  | 0  | 0  | 0  | 0  | 0  | 0  |
| Death within 28 days of hospital admission  | 0   | 0  | 0  | 0   | 0  | 0  | 0  | 0  | 0  | 0  | 0  | 0  |
| <b>18-24 years</b>                          |     |    |    |     |    |    |    |    |    |    |    |    |
| Number of patients hospitalised             | 27  | <5 | <5 | 53  | <5 | <5 | <5 | 0  | <5 | 0  | <5 | <5 |
| Recorded in death certificate               | 0   | 0  | 0  | 0   | 0  | 0  | 0  | 0  | 0  | 0  | 0  | 0  |
| Death within 28 days of hospital admission  | 0   | 0  | 0  | 0   | 0  | 0  | 0  | 0  | 0  | 0  | 0  | 0  |
| <b>Acute disseminated encephalomyelitis</b> |     |    |    |     |    |    |    |    |    |    |    |    |
| <b>5-11 years</b>                           |     |    |    |     |    |    |    |    |    |    |    |    |
| Number of patients hospitalised             | 61  | 12 | 0  | 27  | <5 | 0  | 0  | 0  | 0  | 0  | 0  | 0  |
| Recorded in death certificate               | 0   | 0  | 0  | 0   | 0  | 0  | 0  | 0  | 0  | 0  | 0  | 0  |
| Death within 28 days of hospital admission  | 0   | 0  | 0  | 0   | 0  | 0  | 0  | 0  | 0  | 0  | 0  | 0  |
| <b>12-17 years</b>                          |     |    |    |     |    |    |    |    |    |    |    |    |
| Number of patients hospitalised             | 75  | 6  | <5 | 94  | 5  | 8  | 0  | 0  | 0  | 0  | 0  | 0  |
| Recorded in death certificate               | 0   | 0  | 0  | 0   | 0  | 0  | 0  | 0  | 0  | 0  | 0  | 0  |
| Death within 28 days of hospital admission  | 0   | 0  | 0  | 0   | 0  | 0  | 0  | 0  | 0  | 0  | 0  | 0  |
| <b>18-24 years</b>                          |     |    |    |     |    |    |    |    |    |    |    |    |
| Number of patients hospitalised             | 69  | <5 | <5 | 124 | 12 | 8  | 5  | <5 | <5 | <5 | <5 | 6  |
| Recorded in death certificate               | 0   | 0  | 0  | 0   | 0  | 0  | 0  | 0  | 0  | 0  | 0  | 0  |
| Death within 28 days of hospital admission  | 0   | 0  | 0  | 0   | 0  | 0  | 0  | 0  | 0  | 0  | 0  | 0  |
| <b>Demyelinating disease</b>                |     |    |    |     |    |    |    |    |    |    |    |    |
| <b>5-11 years</b>                           |     |    |    |     |    |    |    |    |    |    |    |    |
| Number of patients hospitalised             | 46  | 6  | 0  | 16  | <5 | <5 | 0  | 0  | 0  | 0  | 0  | 0  |
| Recorded in death certificate               | 0   | 0  | 0  | 0   | 0  | 0  | 0  | 0  | 0  | 0  | 0  | 0  |
| Death within 28 days of hospital admission  | 0   | 0  | 0  | 0   | 0  | 0  | 0  | 0  | 0  | 0  | 0  | 0  |
| <b>12-17 years</b>                          |     |    |    |     |    |    |    |    |    |    |    |    |
| Number of patients hospitalised             | 177 | <5 | <5 | 110 | 7  | 9  | <5 | 0  | 0  | 0  | 0  | 0  |
| Recorded in death certificate               | 0   | 0  | 0  | 0   | 0  | 0  | 0  | 0  | 0  | 0  | 0  | 0  |
| Death within 28 days of hospital admission  | 0   | 0  | 0  | 0   | 0  | 0  | 0  | 0  | 0  | 0  | 0  | 0  |
| <b>18-24 years</b>                          |     |    |    |     |    |    |    |    |    |    |    |    |
| Number of patients hospitalised             | 130 | <5 | <5 | 266 | 11 | 11 | 11 | 0  | <5 | <5 | 7  | 5  |
| Recorded in death certificate               | 0   | 0  | 0  | 0   | 0  | 0  | 0  | 0  | 0  | 0  | 0  | 0  |
| Death within 28 days of hospital admission  | 0   | 0  | 0  | 0   | 0  | 0  | 0  | 0  | 0  | 0  | 0  | 0  |
| <b>Anaphylaxis</b>                          |     |    |    |     |    |    |    |    |    |    |    |    |
| <b>5-11 years</b>                           |     |    |    |     |    |    |    |    |    |    |    |    |
| Number of patients hospitalised             | 208 | 24 | 0  | 70  | <5 | 0  | 0  | 0  | 0  | 0  | 0  | 0  |
| Recorded in death certificate               | 0   | 0  | 0  | 0   | 0  | 0  | 0  | 0  | 0  | 0  | 0  | 0  |
| Death within 28 days of hospital admission  | 0   | 0  | 0  | 0   | 0  | 0  | 0  | 0  | 0  | 0  | 0  | 0  |
| <b>12-17 years</b>                          |     |    |    |     |    |    |    |    |    |    |    |    |
| Number of patients hospitalised             | 265 | 19 | <5 | 397 | 44 | 21 | 7  | 0  | 0  | <5 | 0  | 0  |

|                                            |      |     |    |      |     |     |     |    |    |    |     |    |
|--------------------------------------------|------|-----|----|------|-----|-----|-----|----|----|----|-----|----|
| Recorded in death certificate              | 0    | 0   | 0  | 0    | 0   | 0   | 0   | 0  | 0  | 0  | 0   | 0  |
| Death within 28 days of hospital admission | 0    | 0   | 0  | 0    | 0   | 0   | 0   | 0  | 0  | 0  | 0   | 0  |
| <b>18-24 years</b>                         |      |     |    |      |     |     |     |    |    |    |     |    |
| Number of patients hospitalised            | 306  | 10  | <5 | 476  | 40  | 30  | 16  | <5 | <5 | 6  | 19  | 20 |
| Recorded in death certificate              | 0    | 0   | 0  | 0    | 0   | 0   | 0   | 0  | 0  | 0  | 0   | 0  |
| Death within 28 days of hospital admission | 0    | 0   | 0  | 0    | 0   | 0   | 0   | 0  | 0  | 0  | 0   | 0  |
| <b>Appendicitis</b>                        |      |     |    |      |     |     |     |    |    |    |     |    |
| <b>5-11 years</b>                          |      |     |    |      |     |     |     |    |    |    |     |    |
| Number of patients hospitalised            | 2346 | 213 | <5 | 823  | 63  | 8   | 0   | 0  | 0  | 0  | 0   | 0  |
| Recorded in death certificate              | 0    | 0   | 0  | 0    | 0   | 0   | 0   | 0  | 0  | 0  | 0   | 0  |
| Death within 28 days of hospital admission | 0    | 0   | 0  | 0    | 0   | 0   | 0   | 0  | 0  | 0  | 0   | 0  |
| <b>12-17 years</b>                         |      |     |    |      |     |     |     |    |    |    |     |    |
| Number of patients hospitalised            | 3665 | 209 | 26 | 5512 | 461 | 330 | 64  | 0  | 0  | 9  | <5  | 6  |
| Recorded in death certificate              | 0    | 0   | 0  | 0    | 0   | 0   | 0   | 0  | 0  | 0  | 0   | 0  |
| Death within 28 days of hospital admission | 0    | 0   | 0  | 0    | 0   | 0   | 0   | 0  | 0  | 0  | 0   | 0  |
| <b>18-24 years</b>                         |      |     |    |      |     |     |     |    |    |    |     |    |
| Number of patients hospitalised            | 3123 | 117 | 57 | 6001 | 470 | 382 | 207 | 60 | 48 | 93 | 111 | 94 |
| Recorded in death certificate              | 0    | 0   | 0  | 0    | 0   | 0   | 0   | 0  | 0  | 0  | 0   | 0  |
| Death within 28 days of hospital admission | 0    | 0   | 0  | 0    | 0   | 0   | 0   | 0  | 0  | 0  | 0   | 0  |
| <b>Guillain-Barre syndrome</b>             |      |     |    |      |     |     |     |    |    |    |     |    |
| <b>5-11 years</b>                          |      |     |    |      |     |     |     |    |    |    |     |    |
| Number of patients hospitalised            | 15   | 0   | 0  | <2   | 0   | 0   | 0   | 0  | 0  | 0  | 0   | 0  |
| Recorded in death certificate              | 0    | 0   | 0  | 0    | 0   | 0   | 0   | 0  | 0  | 0  | 0   | 0  |
| Death within 28 days of hospital admission | 0    | 0   | 0  | 0    | 0   | 0   | 0   | 0  | 0  | 0  | 0   | 0  |
| <b>12-17 years</b>                         |      |     |    |      |     |     |     |    |    |    |     |    |
| Number of patients hospitalised            | 13   | 5   | <5 | 22   | <5  | <5  | 0   | 0  | 0  | 0  | 0   | 0  |
| Recorded in death certificate              | 0    | 0   | 0  | 0    | 0   | 0   | 0   | 0  | 0  | 0  | 0   | 0  |
| Death within 28 days of hospital admission | 0    | 0   | 0  | 0    | 0   | 0   | 0   | 0  | 0  | 0  | 0   | 0  |
| <b>18-24 years</b>                         |      |     |    |      |     |     |     |    |    |    |     |    |
| Number of patients hospitalised            | 32   | <5  | 0  | 58   | <5  | 5   | <5  | <5 | 0  | <5 | <5  | 0  |
| Recorded in death certificate              | 0    | 0   | 0  | 0    | 0   | 0   | 0   | 0  | 0  | 0  | 0   | 0  |
| Death within 28 days of hospital admission | 0    | 0   | 0  | 0    | 0   | 0   | 0   | 0  | 0  | 0  | 0   | 0  |
| <b>Angioedema</b>                          |      |     |    |      |     |     |     |    |    |    |     |    |
| <b>5-11 years</b>                          |      |     |    |      |     |     |     |    |    |    |     |    |
| Number of patients hospitalised            | 173  | 12  | 0  | 54   | <5  | 0   | 0   | 0  | 0  | 0  | 0   | 0  |
| Recorded in death certificate              | 0    | 0   | 0  | 0    | 0   | 0   | 0   | 0  | 0  | 0  | 0   | 0  |
| Death within 28 days of hospital admission | 0    | 0   | 0  | 0    | 0   | 0   | 0   | 0  | 0  | 0  | 0   | 0  |
| <b>12-17 years</b>                         |      |     |    |      |     |     |     |    |    |    |     |    |
| Number of patients hospitalised            | 164  | 11  | <5 | 224  | 25  | 12  | <5  | 0  | 0  | <5 | <5  | <5 |

|                                            |     |   |   |     |    |    |   |    |    |    |    |    |
|--------------------------------------------|-----|---|---|-----|----|----|---|----|----|----|----|----|
| Recorded in death certificate              | 0   | 0 | 0 | 0   | 0  | 0  | 0 | 0  | 0  | 0  | 0  | 0  |
| Death within 28 days of hospital admission | 0   | 0 | 0 | 0   | 0  | 0  | 0 | 0  | 0  | 0  | 0  | 0  |
| <b>18-24 years</b>                         |     |   |   |     |    |    |   |    |    |    |    |    |
| Number of patients hospitalised            | 238 | 7 | 6 | 390 | 28 | 25 | 6 | <5 | <5 | <5 | 17 | 13 |
| Recorded in death certificate              | 0   | 0 | 0 | 0   | 0  | 0  | 0 | 0  | 0  | <5 | 0  | 0  |
| Death within 28 days of hospital admission | 0   | 0 | 0 | 0   | 0  | 0  | 0 | 0  | 0  | 0  | 0  | 0  |



**Supplementary Table 4.** Incidence rate ratios and estimated number of excess events per million for individual outcomes in the 1-42 days following vaccination or a SARS-CoV-2 positive test (before or after vaccination) compared to baseline period in females aged 5-11 and 12-17 years. Cells with a hyphen are suppressed; N – number of events; IRR – incidence rate ratio; CI – confidence interval.

|                                              | BNT162b2 vaccine |                   |                        | mRNA-1273 vaccine |              |                        | ChAdOX1 vaccine |              |                        | Positive SARS-CoV-2 test |                      |                        |
|----------------------------------------------|------------------|-------------------|------------------------|-------------------|--------------|------------------------|-----------------|--------------|------------------------|--------------------------|----------------------|------------------------|
|                                              | N                | IRR (95% CI)      | Excess events (95% CI) | N                 | IRR (95% CI) | Excess events (95% CI) | N               | IRR (95% CI) | Excess events (95% CI) | N                        | IRR (95% CI)         | Excess events (95% CI) |
| <b>5-11 years</b>                            |                  |                   |                        |                   |              |                        |                 |              |                        |                          |                      |                        |
| <b>Multisystem inflammatory syndrome</b>     |                  |                   |                        |                   |              |                        |                 |              |                        |                          |                      |                        |
| First dose/positive test (before vaccine)    | <5               | -                 | -                      | 0                 | -            | -                      | 0               | -            | -                      | 97                       | 11.13 (7.96, 15.57)  | 124 (119, 127)         |
| Second dose/positive test (after vaccine)    | 0                | -                 | -                      | 0                 | -            | -                      | 0               | -            | -                      | 0                        | -                    | -                      |
| Third dose                                   | 0                | -                 | -                      | 0                 | -            | -                      | 0               | -            | -                      |                          |                      |                        |
| <b>Myocarditis</b>                           |                  |                   |                        |                   |              |                        |                 |              |                        |                          |                      |                        |
| First dose/positive test (before vaccine)    | 0                | -                 | -                      | 0                 | -            | -                      | 0               | -            | -                      | 5                        | 18.93 (3.22, 111.28) | 7 (5, 7)               |
| Second dose/positive test (after vaccine)    | 0                | -                 | -                      | 0                 | -            | -                      | 0               | -            | -                      | 0                        | -                    | -                      |
| Third dose                                   | 0                | -                 | -                      | 0                 | -            | -                      | 0               | -            | -                      |                          |                      |                        |
| <b>Immune or idiopathic thrombocytopenia</b> |                  |                   |                        |                   |              |                        |                 |              |                        |                          |                      |                        |
| First dose/positive test (before vaccine)    | 6                | 1.26 (0.52, 3.07) | 0                      | 0                 | -            | -                      | 0               | -            | -                      | 25                       | 2.20 (1.42, 3.42)    | 19 (10, 25)            |
| Second dose/positive test (after vaccine)    | <5               | -                 | -                      | 0                 | -            | -                      | 0               | -            | -                      | 0                        | -                    | -                      |
| Third dose                                   | 0                | -                 | -                      | 0                 | -            | -                      | 0               | -            | -                      |                          |                      |                        |
| <b>Epilepsy</b>                              |                  |                   |                        |                   |              |                        |                 |              |                        |                          |                      |                        |
| First dose/positive test (before vaccine)    | 34               | 1.28 (0.87, 1.90) | 0                      | 0                 | -            | -                      | 0               | -            | -                      | 39                       | 0.96 (0.69, 1.35)    | 0                      |
| Second dose/positive test (after vaccine)    | 17               | 1.36 (0.78, 2.34) | 0                      | 0                 | -            | -                      | 0               | -            | -                      | 0                        | -                    | -                      |
| Third dose                                   | 0                | -                 | -                      | 0                 | -            | -                      | 0               | -            | -                      |                          |                      |                        |
| <b>Acute pancreatitis</b>                    |                  |                   |                        |                   |              |                        |                 |              |                        |                          |                      |                        |
| First dose/positive test (before vaccine)    | <5               | -                 | -                      | 0                 | -            | -                      | 0               | -            | -                      | 7                        | 3.86 (1.44, 10.37)   | 7 (3, 9)               |
| Second dose/positive test (after vaccine)    | 0                | -                 | -                      | 0                 | -            | -                      | 0               | -            | -                      | 0                        | -                    | -                      |
| Third dose                                   | 0                | -                 | -                      | 0                 | -            | -                      | 0               | -            | -                      |                          |                      |                        |

|                                             |    |                   |   |   |   |   |   |   |   |    |                   |           |
|---------------------------------------------|----|-------------------|---|---|---|---|---|---|---|----|-------------------|-----------|
| <b>Myositis</b>                             |    |                   |   |   |   |   |   |   |   |    |                   |           |
| First dose/positive test (before vaccine)   | 0  | -                 | - | 0 | - | - | 0 | - | - | 7  | 3.37 (1.32, 8.60) | 7 (2, 9)  |
| Second dose/positive test (after vaccine)   | 0  | -                 | - | 0 | - | - | 0 | - | - | 0  | -                 | -         |
| Third dose                                  | 0  | -                 | - | 0 | - | - | 0 | - | - |    |                   |           |
| <b>Acute disseminated encephalomyelitis</b> |    |                   |   |   |   |   |   |   |   |    |                   |           |
| First dose/positive test (before vaccine)   | <5 | -                 | - | 0 | - | - | 0 | - | - | <5 | -                 | -         |
| Second dose/positive test (after vaccine)   | 0  | -                 | - | 0 | - | - | 0 | - | - | 0  | -                 | -         |
| Third dose                                  | 0  | -                 | - | 0 | - | - | 0 | - | - |    |                   |           |
| <b>Demyelinating disease</b>                |    |                   |   |   |   |   |   |   |   |    |                   |           |
| First dose/positive test (before vaccine)   | <5 | -                 | - | 0 | - | - | 0 | - | - | <5 | -                 | -         |
| Second dose/positive test (after vaccine)   | 0  | -                 | - | 0 | - | - | 0 | - | - | 0  | -                 | -         |
| Third dose                                  | 0  | -                 | - | 0 | - | - | 0 | - | - |    |                   |           |
| <b>Anaphylaxis</b>                          |    |                   |   |   |   |   |   |   |   |    |                   |           |
| First dose/positive test (before vaccine)   | <5 | -                 | - | 0 | - | - | 0 | - | - | 10 | 2.20 (1.03, 4.67) | 8 (0, 11) |
| Second dose/positive test (after vaccine)   | 0  | -                 | - | 0 | - | - | 0 | - | - | 0  | -                 | -         |
| Third dose                                  | 0  | -                 | - | 0 | - | - | 0 | - | - |    |                   |           |
| <b>Appendicitis</b>                         |    |                   |   |   |   |   |   |   |   |    |                   |           |
| First dose/positive test (before vaccine)   | 19 | 0.94 (0.57, 1.53) | 0 | 0 | - | - | 0 | - | - | 83 | 1.17 (0.92, 1.48) | 0         |
| Second dose/positive test (after vaccine)   | <5 | -                 | - | 0 | - | - | 0 | - | - | <5 | -                 | -         |
| Third dose                                  | 0  | -                 | - | 0 | - | - | 0 | - | - |    |                   |           |
| <b>Guillain-Barre Syndrome</b>              |    |                   |   |   |   |   |   |   |   |    |                   |           |
| First dose/positive test (before vaccine)   | 0  | -                 | - | 0 | - | - | 0 | - | - | 0  | -                 | -         |
| Second dose/positive test (after vaccine)   | 0  | -                 | - | 0 | - | - | 0 | - | - | 0  | -                 | -         |
| Third dose                                  | 0  | -                 | - | 0 | - | - | 0 | - | - |    |                   |           |
| <b>Angioedema</b>                           |    |                   |   |   |   |   |   |   |   |    |                   |           |
| First dose/positive test (before vaccine)   | 0  | -                 | - | 0 | - | - | 0 | - | - | 6  | 1.06 (0.44, 2.57) | 0         |

|                                              |     |                    |          |    |   |   |    |                   |                |    |                     |             |
|----------------------------------------------|-----|--------------------|----------|----|---|---|----|-------------------|----------------|----|---------------------|-------------|
| Second dose/positive test (after vaccine)    | 0   | -                  | -        | 0  | - | - | 0  | -                 | -              | 0  | -                   | -           |
| Third dose                                   | 0   | -                  | -        | 0  | - | - | 0  | -                 | -              |    |                     |             |
| <b>12-17 years</b>                           |     |                    |          |    |   |   |    |                   |                |    |                     |             |
| <b>Multisystem inflammatory syndrome</b>     |     |                    |          |    |   |   |    |                   |                |    |                     |             |
| First dose/positive test (before vaccine)    | <5  | -                  | -        | 0  | - | - | 0  | -                 | -              | 27 | 13.11 (6.90, 24.91) | 48 (44, 50) |
| Second dose/positive test (after vaccine)    | <5  | -                  | -        | 0  | - | - | 0  | -                 | -              | 0  | -                   | -           |
| Third dose                                   | <5  | -                  | -        | 0  | - | - | 0  | -                 | -              |    |                     |             |
| <b>Myocarditis</b>                           |     |                    |          |    |   |   |    |                   |                |    |                     |             |
| First dose/positive test (before vaccine)    | 6   | 4.01 (1.33, 12.09) | 3 (1, 4) | 0  | - | - | 0  | -                 | -              | 0  | -                   | -           |
| Second dose/positive test (after vaccine)    | <5  | -                  | -        | 0  | - | - | 0  | -                 | -              | 0  | -                   | -           |
| Third dose                                   | 0   | -                  | -        | 0  | - | - | 0  | -                 | -              |    |                     |             |
| <b>Immune or idiopathic thrombocytopenia</b> |     |                    |          |    |   |   |    |                   |                |    |                     |             |
| First dose/positive test (before vaccine)    | 20  | 0.60 (0.37, 0.96)  | 0        | 0  | - | - | <5 | -                 | -              | 22 | 2.00 (1.26, 3.17)   | 21 (9, 29)  |
| Second dose/positive test (after vaccine)    | 17  | 0.70 (0.42, 1.18)  | 0        | 0  | - | - | 0  | -                 | -              | <5 | -                   | -           |
| Third dose                                   | <5  | -                  | -        | 0  | - | - | 0  | -                 | -              |    |                     |             |
| <b>Epilepsy</b>                              |     |                    |          |    |   |   |    |                   |                |    |                     |             |
| First dose/positive test (before vaccine)    | 116 | 1.10 (0.90, 1.35)  | 0        | 0  | - | - | 8  | 2.26 (1.03, 4.94) | 813 (44, 1164) | 30 | 1.06 (0.73, 1.54)   | 0           |
| Second dose/positive test (after vaccine)    | 101 | 1.17 (0.95, 1.45)  | 0        | <5 | - | - | 5  | 1.33 (0.51, 3.44) | 0              | 12 | 1.59 (0.89, 2.84)   | 0           |
| Third dose                                   | 30  | 0.97 (0.66, 1.43)  | 0        | <5 | - | - | 0  | -                 | -              |    |                     |             |
| <b>Acute pancreatitis</b>                    |     |                    |          |    |   |   |    |                   |                |    |                     |             |
| First dose/positive test (before vaccine)    | 18  | 1.70 (0.99, 2.90)  | 0        | 0  | - | - | <5 | -                 | -              | <5 | -                   | -           |
| Second dose/positive test (after vaccine)    | 9   | 1.10 (0.54, 2.25)  | 0        | 0  | - | - | 0  | -                 | -              | <5 | -                   | -           |
| Third dose                                   | <5  | -                  | -        | 0  | - | - | 0  | -                 | -              |    |                     |             |
| <b>Myositis</b>                              |     |                    |          |    |   |   |    |                   |                |    |                     |             |
| First dose/positive test (before vaccine)    | 6   | 1.75 (0.67, 4.55)  | 0        | 0  | - | - | 0  | -                 | -              | <5 | -                   | -           |
| Second dose/positive test (after vaccine)    | 0   | -                  | -        | 0  | - | - | 0  | -                 | -              | 0  | -                   | -           |
| Third dose                                   | <5  | -                  | -        | 0  | - | - | 0  | -                 | -              |    |                     |             |

| <b>Acute disseminated encephalomyelitis</b> |     |                   |          |    |                   |   |    |   |   |     |                   |            |
|---------------------------------------------|-----|-------------------|----------|----|-------------------|---|----|---|---|-----|-------------------|------------|
| First dose/positive test (before vaccine)   | <5  | -                 | -        | 0  | -                 | - | 0  | - | - | <5  | -                 | -          |
| Second dose/positive test (after vaccine)   | 5   | 2.56 (0.92, 7.10) | 0        | 0  | -                 | - | 0  | - | - | <5  | -                 | -          |
| Third dose                                  | 0   | -                 | -        | 0  | -                 | - | 0  | - | - |     |                   |            |
| <b>Demyelinating disease</b>                |     |                   |          |    |                   |   |    |   |   |     |                   |            |
| First dose/positive test (before vaccine)   | 5   | 0.89 (0.34, 2.34) | 0        | 0  | -                 | - | 0  | - | - | <5  | -                 | -          |
| Second dose/positive test (after vaccine)   | 8   | 2.41 (1.06, 5.48) | 4 (0, 6) | 0  | -                 | - | 0  | - | - | <5  | -                 | -          |
| Third dose                                  | 0   | -                 | -        | 0  | -                 | - | 0  | - | - |     |                   |            |
| <b>Anaphylaxis</b>                          |     |                   |          |    |                   |   |    |   |   |     |                   |            |
| First dose/positive test (before vaccine)   | 24  | 1.21 (0.76, 1.92) | 0        | 0  | -                 | - | 0  | - | - | 7   | 0.98 (0.45, 2.14) | 0          |
| Second dose/positive test (after vaccine)   | 9   | 0.68 (0.34, 1.36) | 0        | 0  | -                 | - | 0  | - | - | <5  | -                 | -          |
| Third dose                                  | <5  | -                 | -        | <5 | -                 | - | 0  | - | - |     |                   |            |
| <b>Appendicitis</b>                         |     |                   |          |    |                   |   |    |   |   |     |                   |            |
| First dose/positive test (before vaccine)   | 191 | 0.83 (0.70, 0.97) | 0        | 0  | -                 | - | <5 | - | - | 108 | 1.28 (1.05, 1.57) | 45 (9, 75) |
| Second dose/positive test (after vaccine)   | 155 | 0.90 (0.75, 1.07) | 0        | 0  | -                 | - | <5 | - | - | 11  | 0.65 (0.36, 1.19) | 0          |
| Third dose                                  | 29  | 0.87 (0.59, 1.27) | 0        | 5  | 1.35 (0.54, 3.42) | 0 | 0  | - | - |     |                   |            |
| <b>Guillain-Barre Syndrome</b>              |     |                   |          |    |                   |   |    |   |   |     |                   |            |
| First dose/positive test (before vaccine)   | 0   | -                 | -        | 0  | -                 | - | 0  | - | - | <5  | -                 | -          |
| Second dose/positive test (after vaccine)   | <5  | -                 | -        | 0  | -                 | - | 0  | - | - | 0   | -                 | -          |
| Third dose                                  | 0   | -                 | -        | 0  | -                 | - | 0  | - | - |     |                   |            |
| <b>Angioedema</b>                           |     |                   |          |    |                   |   |    |   |   |     |                   |            |
| First dose/positive test (before vaccine)   | 16  | 1.37 (0.78, 2.41) | 0        | 0  | -                 | - | 0  | - | - | 6   | 1.15 (0.49, 2.70) | 0          |
| Second dose/positive test (after vaccine)   | 8   | 0.82 (0.39, 1.73) | 0        | 0  | -                 | - | 0  | - | - | <5  | -                 | -          |
| Third dose                                  | <5  | -                 | -        | <5 | -                 | - | 0  | - | - |     |                   |            |

**Supplementary Table 5.** Incidence rate ratios and estimated number of excess events per million for individual outcomes in the 1-42 days following vaccination or a SARS-CoV-2 positive test (before or after vaccination) compared to baseline period in males aged 5-11 and 12-17 years. Cells with a hyphen are suppressed; N – number of events; IRR – incidence rate ratio; CI – confidence interval.

|                                              | BNT162b2 vaccine |                   |                        | mRNA-1273 vaccine |              |                        | ChAdOX1 vaccine |              |                        | Positive SARS-CoV-2 test |                     |                        |
|----------------------------------------------|------------------|-------------------|------------------------|-------------------|--------------|------------------------|-----------------|--------------|------------------------|--------------------------|---------------------|------------------------|
|                                              | N                | IRR (95% CI)      | Excess events (95% CI) | N                 | IRR (95% CI) | Excess events (95% CI) | N               | IRR (95% CI) | Excess events (95% CI) | N                        | IRR (95% CI)        | Excess events (95% CI) |
| <b>5-11 years</b>                            |                  |                   |                        |                   |              |                        |                 |              |                        |                          |                     |                        |
| <b>Multisystem inflammatory syndrome</b>     |                  |                   |                        |                   |              |                        |                 |              |                        |                          |                     |                        |
| First dose/positive test (before vaccine)    | 0                | -                 | -                      | 0                 | -            | -                      | 0               | -            | -                      | 129                      | 12.00 (8.92, 16.12) | 162 (157, 166)         |
| Second dose/positive test (after vaccine)    | 0                | -                 | -                      | 0                 | -            | -                      | 0               | -            | -                      | 0                        | -                   | -                      |
| Third dose                                   | 0                | -                 | -                      | 0                 | -            | -                      | 0               | -            | -                      |                          |                     |                        |
| <b>Myocarditis</b>                           |                  |                   |                        |                   |              |                        |                 |              |                        |                          |                     |                        |
| First dose/positive test (before vaccine)    | 0                | -                 | -                      | 0                 | -            | -                      | 0               | -            | -                      | <5                       | -                   | -                      |
| Second dose/positive test (after vaccine)    | 0                | -                 | -                      | 0                 | -            | -                      | 0               | -            | -                      | 0                        | -                   | -                      |
| Third dose                                   | 0                | -                 | -                      | 0                 | -            | -                      | 0               | -            | -                      |                          |                     |                        |
| <b>Immune or idiopathic thrombocytopenia</b> |                  |                   |                        |                   |              |                        |                 |              |                        |                          |                     |                        |
| First dose/positive test (before vaccine)    | <5               | -                 | -                      | 0                 | -            | -                      | 0               | -            | -                      | 36                       | 2.46 (1.68, 3.58)   | 29 (20, 36)            |
| Second dose/positive test (after vaccine)    | 0                | -                 | -                      | 0                 | -            | -                      | 0               | -            | -                      | 0                        | -                   | -                      |
| Third dose                                   | 0                | -                 | -                      | 0                 | -            | -                      | 0               | -            | -                      |                          |                     |                        |
| <b>Epilepsy</b>                              |                  |                   |                        |                   |              |                        |                 |              |                        |                          |                     |                        |
| First dose/positive test (before vaccine)    | 27               | 0.80 (0.52, 1.21) | 0                      | 0                 | -            | -                      | 0               | -            | -                      | 61                       | 1.26 (0.96, 1.66)   | 0                      |
| Second dose/positive test (after vaccine)    | 10               | 0.59 (0.31, 1.13) | 0                      | 0                 | -            | -                      | 0               | -            | -                      | <5                       | -                   | -                      |
| Third dose                                   | 0                | -                 | -                      | 0                 | -            | -                      | 0               | -            | -                      |                          |                     |                        |
| <b>Acute pancreatitis</b>                    |                  |                   |                        |                   |              |                        |                 |              |                        |                          |                     |                        |
| First dose/positive test (before vaccine)    | 0                | -                 | -                      | 0                 | -            | -                      | 0               | -            | -                      | <5                       | -                   | -                      |
| Second dose/positive test (after vaccine)    | 0                | -                 | -                      | 0                 | -            | -                      | 0               | -            | -                      | 0                        | -                   | -                      |
| Third dose                                   | 0                | -                 | -                      | 0                 | -            | -                      | 0               | -            | -                      |                          |                     |                        |

| <b>Myositis</b>                             |    |                   |   |   |   |   |   |   |   |     |                    |            |  |
|---------------------------------------------|----|-------------------|---|---|---|---|---|---|---|-----|--------------------|------------|--|
| First dose/positive test (before vaccine)   | <5 | -                 | - | 0 | - | - | 0 | - | - | 8   | 8.70 (3.20, 23.67) | 10 (8, 10) |  |
| Second dose/positive test (after vaccine)   | 0  | -                 | - | 0 | - | - | 0 | - | - | 0   | -                  | -          |  |
| Third dose                                  | 0  | -                 | - | 0 | - | - | 0 | - | - |     |                    |            |  |
| <b>Acute disseminated encephalomyelitis</b> |    |                   |   |   |   |   |   |   |   |     |                    |            |  |
| First dose/positive test (before vaccine)   | 0  | -                 | - | 0 | - | - | 0 | - | - | 10  | 5.15 (2.27, 11.68) | 11 (8, 13) |  |
| Second dose/positive test (after vaccine)   | 0  | -                 | - | 0 | - | - | 0 | - | - | 0   | -                  | -          |  |
| Third dose                                  | 0  | -                 | - | 0 | - | - | 0 | - | - |     |                    |            |  |
| <b>Demyelinating disease</b>                |    |                   |   |   |   |   |   |   |   |     |                    |            |  |
| First dose/positive test (before vaccine)   | 0  | -                 | - | 0 | - | - | 0 | - | - | <5  | -                  | -          |  |
| Second dose/positive test (after vaccine)   | <5 | -                 | - | 0 | - | - | 0 | - | - | 0   | -                  | -          |  |
| Third dose                                  | 0  | -                 | - | 0 | - | - | 0 | - | - |     |                    |            |  |
| <b>Anaphylaxis</b>                          |    |                   |   |   |   |   |   |   |   |     |                    |            |  |
| First dose/positive test (before vaccine)   | <5 | -                 | - | 0 | - | - | 0 | - | - | 14  | 1.17 (0.64, 2.13)  | 0          |  |
| Second dose/positive test (after vaccine)   | 0  | -                 | - | 0 | - | - | 0 | - | - | 0   | -                  | -          |  |
| Third dose                                  | 0  | -                 | - | 0 | - | - | 0 | - | - |     |                    |            |  |
| <b>Appendicitis</b>                         |    |                   |   |   |   |   |   |   |   |     |                    |            |  |
| First dose/positive test (before vaccine)   | 44 | 1.06 (0.76, 1.48) | 0 | 0 | - | - | 0 | - | - | 130 | 1.14 (0.94, 1.37)  | 0          |  |
| Second dose/positive test (after vaccine)   | <5 | -                 | - | 0 | - | - | 0 | - | - | 0   | -                  | -          |  |
| Third dose                                  | 0  | -                 | - | 0 | - | - | 0 | - | - |     |                    |            |  |
| <b>Guillain-Barre Syndrome</b>              |    |                   |   |   |   |   |   |   |   |     |                    |            |  |
| First dose/positive test (before vaccine)   | 0  | -                 | - | 0 | - | - | 0 | - | - | 0   | -                  | -          |  |
| Second dose/positive test (after vaccine)   | 0  | -                 | - | 0 | - | - | 0 | - | - | 0   | -                  | -          |  |
| Third dose                                  | 0  | -                 | - | 0 | - | - | 0 | - | - |     |                    |            |  |
| <b>Angioedema</b>                           |    |                   |   |   |   |   |   |   |   |     |                    |            |  |
| First dose/positive test (before vaccine)   | <5 | -                 | - | 0 | - | - | 0 | - | - | 6   | 0.99 (0.42, 2.36)  | 0          |  |

|                                              |    |                   |           |    |   |   |    |                   |   |    |                     |                |
|----------------------------------------------|----|-------------------|-----------|----|---|---|----|-------------------|---|----|---------------------|----------------|
| Second dose/positive test (after vaccine)    | 0  | -                 | -         | 0  | - | - | 0  | -                 | - | 0  | -                   | -              |
| Third dose                                   | 0  | -                 | -         | 0  | - | - | 0  | -                 | - |    |                     |                |
| <b>12-17 years</b>                           |    |                   |           |    |   |   |    |                   |   |    |                     |                |
| <b>Multisystem inflammatory syndrome</b>     |    |                   |           |    |   |   |    |                   |   |    |                     |                |
| First dose/positive test (before vaccine)    | 17 | 0.76 (0.38, 1.49) | 0         | 0  | - | - | 0  | -                 | - | 71 | 12.33 (8.31, 18.31) | 131 (126, 135) |
| Second dose/positive test (after vaccine)    | <5 | -                 | -         | 0  | - | - | 0  | -                 | - | <5 | -                   | -              |
| Third dose                                   | 0  | -                 | -         | 0  | - | - | 0  | -                 | - |    |                     |                |
| <b>Myocarditis</b>                           |    |                   |           |    |   |   |    |                   |   |    |                     |                |
| First dose/positive test (before vaccine)    | 13 | 1.44 (0.71, 2.92) | 0         | 0  | - | - | <5 | -                 | - | 7  | 4.39 (1.74, 11.10)  | 11 (6, 13)     |
| Second dose/positive test (after vaccine)    | 14 | 2.87 (1.50, 5.51) | 9 (4, 11) | 0  | - | - | 0  | -                 | - | <5 | -                   | -              |
| Third dose                                   | <5 | -                 | -         | <5 | - | - | 0  | -                 | - |    |                     |                |
| <b>Immune or idiopathic thrombocytopenia</b> |    |                   |           |    |   |   |    |                   |   |    |                     |                |
| First dose/positive test (before vaccine)    | 21 | 1.00 (0.63, 1.59) | 0         | 0  | - | - | 0  | -                 | - | 15 | 1.58 (0.91, 2.72)   | 0              |
| Second dose/positive test (after vaccine)    | 14 | 0.99 (0.56, 1.73) | 0         | 0  | - | - | <5 | -                 | - | <5 | -                   | -              |
| Third dose                                   | 8  | 1.46 (0.69, 3.09) | 0         | <5 | - | - | 0  | -                 | - |    |                     |                |
| <b>Epilepsy</b>                              |    |                   |           |    |   |   |    |                   |   |    |                     |                |
| First dose/positive test (before vaccine)    | 99 | 0.94 (0.75, 1.16) | 0         | 0  | - | - | 7  | 1.63 (0.72, 3.70) | 0 | 47 | 1.50 (1.11, 2.04)   | 32 (9, 48)     |
| Second dose/positive test (after vaccine)    | 89 | 1.16 (0.93, 1.46) | 0         | 0  | - | - | <5 | -                 | - | 10 | 1.57 (0.83, 2.96)   | 0              |
| Third dose                                   | 18 | 0.68 (0.42, 1.10) | 0         | <5 | - | - | 0  | -                 | - |    |                     |                |
| <b>Acute pancreatitis</b>                    |    |                   |           |    |   |   |    |                   |   |    |                     |                |
| First dose/positive test (before vaccine)    | 10 | 0.80 (0.39, 1.65) | 0         | 0  | - | - | <5 | -                 | - | <5 | -                   | -              |
| Second dose/positive test (after vaccine)    | <5 | -                 | -         | 0  | - | - | 0  | -                 | - | 0  | -                   | -              |
| Third dose                                   | <5 | -                 | -         | 0  | - | - | 0  | -                 | - |    |                     |                |
| <b>Myositis</b>                              |    |                   |           |    |   |   |    |                   |   |    |                     |                |
| First dose/positive test (before vaccine)    | <5 | -                 | -         | 0  | - | - | 0  | -                 | - | 0  | -                   | -              |
| Second dose/positive test (after vaccine)    | <5 | -                 | -         | 0  | - | - | <5 | -                 | - | 0  | -                   | -              |
| Third dose                                   | 0  | -                 | -         | 0  | - | - | 0  | -                 | - |    |                     |                |

| <b>Acute disseminated encephalomyelitis</b> |     |                   |   |    |   |   |    |   |   |     |                   |            |
|---------------------------------------------|-----|-------------------|---|----|---|---|----|---|---|-----|-------------------|------------|
| First dose/positive test (before vaccine)   | <5  | -                 | - | 0  | - | - | 0  | - | - | <5  | -                 | -          |
| Second dose/positive test (after vaccine)   | <5  | -                 | - | 0  | - | - | 0  | - | - | <5  | -                 | -          |
| Third dose                                  | 0   | -                 | - | 0  | - | - | 0  | - | - |     |                   |            |
| <b>Demyelinating disease</b>                |     |                   |   |    |   |   |    |   |   |     |                   |            |
| First dose/positive test (before vaccine)   | <5  | -                 | - | 0  | - | - | 0  | - | - | <5  | -                 | -          |
| Second dose/positive test (after vaccine)   | <5  | -                 | - | 0  | - | - | 0  | - | - | 0   | -                 | -          |
| Third dose                                  | <5  | -                 | - | 0  | - | - | 0  | - | - |     |                   |            |
| <b>Anaphylaxis</b>                          |     |                   |   |    |   |   |    |   |   |     |                   |            |
| First dose/positive test (before vaccine)   | 20  | 1.52 (0.91, 2.52) | 0 | 0  | - | - | 0  | - | - | 12  | 2.20 (1.18, 4.10) | 13 (4, 18) |
| Second dose/positive test (after vaccine)   | 12  | 1.07 (0.57, 1.99) | 0 | 0  | - | - | 0  | - | - | <5  | -                 | -          |
| Third dose                                  | <5  | -                 | - | 0  | - | - | 0  | - | - |     |                   |            |
| <b>Appendicitis</b>                         |     |                   |   |    |   |   |    |   |   |     |                   |            |
| First dose/positive test (before vaccine)   | 270 | 0.97 (0.85, 1.11) | 0 | 0  | - | - | <5 | - | - | 101 | 0.92 (0.75, 1.13) | 0          |
| Second dose/positive test (after vaccine)   | 175 | 0.89 (0.76, 1.05) | 0 | 0  | - | - | <5 | - | - | 15  | 0.95 (0.57, 1.59) | 0          |
| Third dose                                  | 35  | 1.22 (0.86, 1.73) | 0 | <5 | - | - | 0  | - | - |     |                   |            |
| <b>Guillain-Barre Syndrome</b>              |     |                   |   |    |   |   |    |   |   |     |                   |            |
| First dose/positive test (before vaccine)   | <5  | -                 | - | 0  | - | - | 0  | - | - | <5  | -                 | -          |
| Second dose/positive test (after vaccine)   | 0   | -                 | - | 0  | - | - | 0  | - | - | <5  | -                 | -          |
| Third dose                                  | 0   | -                 | - | 0  | - | - | 0  | - | - |     |                   |            |
| <b>Angioedema</b>                           |     |                   |   |    |   |   |    |   |   |     |                   |            |
| First dose/positive test (before vaccine)   | 9   | 1.46 (0.68, 3.17) | 0 | 0  | - | - | <5 | - | - | 5   | 2.08 (0.77, 5.60) | 0          |
| Second dose/positive test (after vaccine)   | <5  | -                 | - | 0  | - | - | <5 | - | - | 0   | -                 | -          |
| Third dose                                  | <5  | -                 | - | 0  | - | - | 0  | - | - |     |                   |            |



**Supplementary Table 6.** Risks of individual outcomes in the 1-42 days following vaccination or a SARS-CoV-2 positive test (before or after vaccination) compared to baseline period in young people aged 5-11, 12-17 and 18-24 years of white and non-white ethnicity. Cells with a hyphen are suppressed and cells with \* are models that did not converge; N – number of events; IRR – incidence rate ratio; CI – confidence interval. Relative IRR ~ (IRR in young people of non-white ethnicity)/(IRR in young people of white ethnicity). Non-white ethnicity comprises Indian, Pakistani, Bangladeshi, Other Asian, Black Caribbean, Black African, Chinese and Other ethnicity as recorded on hospital or GP record.

|                                              | BNT162b2 vaccine |                   |                       | mRNA-1273 vaccine |     |                       | ChAdOX1 vaccine |     |                       | Positive SARS-CoV-2 test |                      |                       |
|----------------------------------------------|------------------|-------------------|-----------------------|-------------------|-----|-----------------------|-----------------|-----|-----------------------|--------------------------|----------------------|-----------------------|
|                                              | N                | IRR               | Relative IRR (95% CI) | N                 | IRR | Relative IRR (95% CI) | N               | IRR | Relative IRR (95% CI) | N                        | IRR                  | Relative IRR (95% CI) |
| <b>5-11 years</b>                            |                  |                   |                       |                   |     |                       |                 |     |                       |                          |                      |                       |
| <b>Multisystem inflammatory syndrome</b>     |                  |                   |                       |                   |     |                       |                 |     |                       |                          |                      |                       |
| <b>White ethnicity</b>                       |                  |                   |                       |                   |     |                       |                 |     |                       |                          |                      |                       |
| First dose/positive test (before vaccine)    | <5               | -                 | -                     | 0                 | -   | -                     | 0               | -   | -                     | 147                      | 11.24 (8.46, 14.94)  | 1 (Ref)               |
| Second dose/positive test (after vaccine)    | 0                | -                 | -                     | 0                 | -   | -                     | 0               | -   | -                     | 0                        | -                    | -                     |
| Third dose                                   | 0                | -                 | -                     | 0                 | -   | -                     | 0               | -   | -                     |                          |                      |                       |
| <b>Non-white ethnicity</b>                   |                  |                   |                       |                   |     |                       |                 |     |                       |                          |                      |                       |
| First dose/positive test (before vaccine)    | 0                | -                 | -                     | 0                 | -   | -                     | 0               | -   | -                     | 55                       | 11.91 (7.78, 18.24)  | 0.98 (0.60, 1.60)     |
| Second dose/positive test (after vaccine)    | 0                | -                 | -                     | 0                 | -   | -                     | 0               | -   | -                     | 0                        | -                    | -                     |
| Third dose                                   | 0                | -                 | -                     | 0                 | -   | -                     | 0               | -   | -                     |                          |                      |                       |
| <b>Myocarditis</b>                           |                  |                   |                       |                   |     |                       |                 |     |                       |                          |                      |                       |
| <b>White ethnicity</b>                       |                  |                   |                       |                   |     |                       |                 |     |                       |                          |                      |                       |
| First dose/positive test (before vaccine)    | 0                | -                 | -                     | 0                 | -   | -                     | 0               | -   | -                     | 6                        | 35.89 (2.10, 613.53) | 1 (Ref)               |
| Second dose/positive test (after vaccine)    | 0                | -                 | -                     | 0                 | -   | -                     | 0               | -   | -                     | 0                        | -                    | -                     |
| Third dose                                   | 0                | -                 | -                     | 0                 | -   | -                     | 0               | -   | -                     |                          |                      |                       |
| <b>Non-white ethnicity</b>                   |                  |                   |                       |                   |     |                       |                 |     |                       |                          |                      |                       |
| First dose/positive test (before vaccine)    | 0                | -                 | -                     | 0                 | -   | -                     | 0               | -   | -                     | 0                        | -                    | -                     |
| Second dose/positive test (after vaccine)    | 0                | -                 | -                     | 0                 | -   | -                     | 0               | -   | -                     | 0                        | -                    | -                     |
| Third dose                                   | 0                | -                 | -                     | 0                 | -   | -                     | 0               | -   | -                     |                          |                      |                       |
| <b>Immune or idiopathic thrombocytopenia</b> |                  |                   |                       |                   |     |                       |                 |     |                       |                          |                      |                       |
| <b>White ethnicity</b>                       |                  |                   |                       |                   |     |                       |                 |     |                       |                          |                      |                       |
| First dose/positive test (before vaccine)    | 9                | 1.04 (0.48, 2.22) | 1 (Ref)               | 0                 | -   | -                     | 0               | -   | -                     | 36                       | 1.94 (1.35, 2.80)    | 1 (Ref)               |

|                                           |    |                   |         |   |   |   |   |   |   |    |                    |                   |
|-------------------------------------------|----|-------------------|---------|---|---|---|---|---|---|----|--------------------|-------------------|
| Second dose/positive test (after vaccine) | <5 | -                 | -       | 0 | - | - | 0 | - | - | 0  | -                  | -                 |
| Third dose                                | 0  | -                 | -       | 0 | - | - | 0 | - | - |    |                    |                   |
| <b>Non-white ethnicity</b>                |    |                   |         |   |   |   |   |   |   |    |                    |                   |
| First dose/positive test (before vaccine) | <5 | -                 | -       | 0 | - | - | 0 | - | - | 21 | 3.33 (2.01, 5.54)  | 1.79 (0.98, 3.25) |
| Second dose/positive test (after vaccine) | 0  | -                 | -       | 0 | - | - | 0 | - | - | 0  | -                  | -                 |
| Third dose                                | 0  | -                 | -       | 0 | - | - | 0 | - | - |    |                    |                   |
| <b>Epilepsy</b>                           |    |                   |         |   |   |   |   |   |   |    |                    |                   |
| <b>White ethnicity</b>                    |    |                   |         |   |   |   |   |   |   |    |                    |                   |
| First dose/positive test (before vaccine) | 49 | *                 | *       | 0 | - | - | 0 | - | - | 72 | 1.00 (0.78, 1.28)  | *                 |
| Second dose/positive test (after vaccine) | 26 | 1.15 (0.75, 1.77) | 1 (Ref) | 0 | - | - | 0 | - | - | 0  | -                  | -                 |
| Third dose                                | 0  | -                 | -       | 0 | - | - | 0 | - | - |    |                    |                   |
| <b>Non-white ethnicity</b>                |    |                   |         |   |   |   |   |   |   |    |                    |                   |
| First dose/positive test (before vaccine) | 11 | 1.04 (0.52, 2.07) | *       | 0 | - | - | 0 | - | - | 19 | 1.47 (0.90, 2.41)  | *                 |
| Second dose/positive test (after vaccine) | 0  | -                 | -       | 0 | - | - | 0 | - | - | <5 | -                  | -                 |
| Third dose                                | 0  | -                 | -       | 0 | - | - | 0 | - | - |    |                    |                   |
| <b>Acute pancreatitis</b>                 |    |                   |         |   |   |   |   |   |   |    |                    |                   |
| <b>White ethnicity</b>                    |    |                   |         |   |   |   |   |   |   |    |                    |                   |
| First dose/positive test (before vaccine) | 0  | -                 | -       | 0 | - | - | 0 | - | - | 5  | 2.21 (0.75, 6.51)  | 1 (Ref)           |
| Second dose/positive test (after vaccine) | 0  | -                 | -       | 0 | - | - | 0 | - | - | 0  | -                  | -                 |
| Third dose                                | 0  | -                 | -       | 0 | - | - | 0 | - | - |    |                    |                   |
| <b>Non-white ethnicity</b>                |    |                   |         |   |   |   |   |   |   |    |                    |                   |
| First dose/positive test (before vaccine) | <5 | -                 | -       | 0 | - | - | 0 | - | - | <5 | -                  | -                 |
| Second dose/positive test (after vaccine) | 0  | -                 | -       | 0 | - | - | 0 | - | - | 0  | -                  | -                 |
| Third dose                                | 0  | -                 | -       | 0 | - | - | 0 | - | - |    |                    |                   |
| <b>Myositis</b>                           |    |                   |         |   |   |   |   |   |   |    |                    |                   |
| <b>White ethnicity</b>                    |    |                   |         |   |   |   |   |   |   |    |                    |                   |
| First dose/positive test (before vaccine) | <5 | -                 | -       | 0 | - | - | 0 | - | - | 13 | 6.87 (3.19, 14.77) | 1 (Ref)           |
| Second dose/positive test (after vaccine) | 0  | -                 | -       | 0 | - | - | 0 | - | - | 0  | -                  | -                 |
| Third dose                                | 0  | -                 | -       | 0 | - | - | 0 | - | - |    |                    |                   |

|                                             |    |                   |                   |   |   |   |   |   |   |     |                   |                   |
|---------------------------------------------|----|-------------------|-------------------|---|---|---|---|---|---|-----|-------------------|-------------------|
| <b>Non-white ethnicity</b>                  |    |                   |                   |   |   |   |   |   |   |     |                   |                   |
| First dose/positive test (before vaccine)   | 0  | -                 | -                 | 0 | - | - | 0 | - | - | <5  | -                 | -                 |
| Second dose/positive test (after vaccine)   | 0  | -                 | -                 | 0 | - | - | 0 | - | - | 0   | -                 | -                 |
| Third dose                                  | 0  | -                 | -                 | 0 | - | - | 0 | - | - |     |                   |                   |
| <b>Acute disseminated encephalomyelitis</b> |    |                   |                   |   |   |   |   |   |   |     |                   |                   |
| <b>White ethnicity</b>                      |    |                   |                   |   |   |   |   |   |   |     |                   |                   |
| First dose/positive test (before vaccine)   | <5 | -                 | -                 | 0 | - | - | 0 | - | - | 8   | 2.27 (0.99, 5.18) | 1 (Ref)           |
| Second dose/positive test (after vaccine)   | 0  | -                 | -                 | 0 | - | - | 0 | - | - | 0   | -                 | -                 |
| Third dose                                  | 0  | -                 | -                 | 0 | - | - | 0 | - | - |     |                   |                   |
| <b>Non-white ethnicity</b>                  |    |                   |                   |   |   |   |   |   |   |     |                   |                   |
| First dose/positive test (before vaccine)   | 0  | -                 | -                 | 0 | - | - | 0 | - | - | <5  | -                 | -                 |
| Second dose/positive test (after vaccine)   | 0  | -                 | -                 | 0 | - | - | 0 | - | - | 0   | -                 | -                 |
| Third dose                                  | 0  | -                 | -                 | 0 | - | - | 0 | - | - |     |                   |                   |
| <b>Demyelinating disease</b>                |    |                   |                   |   |   |   |   |   |   |     |                   |                   |
| <b>White ethnicity</b>                      |    |                   |                   |   |   |   |   |   |   |     |                   |                   |
| First dose/positive test (before vaccine)   | <5 | -                 | -                 | 0 | - | - | 0 | - | - | 6   | 2.71 (1.02, 7.19) | 1 (Ref)           |
| Second dose/positive test (after vaccine)   | <5 | -                 | -                 | 0 | - | - | 0 | - | - | 0   | -                 | -                 |
| Third dose                                  | 0  | -                 | -                 | 0 | - | - | 0 | - | - |     |                   |                   |
| <b>Non-white ethnicity</b>                  |    |                   |                   |   |   |   |   |   |   |     |                   |                   |
| First dose/positive test (before vaccine)   | <5 | -                 | -                 | 0 | - | - | 0 | - | - | 0   | -                 | -                 |
| Second dose/positive test (after vaccine)   | 0  | -                 | -                 | 0 | - | - | 0 | - | - | 0   | -                 | -                 |
| Third dose                                  | 0  | -                 | -                 | 0 | - | - | 0 | - | - |     |                   |                   |
| <b>Appendicitis</b>                         |    |                   |                   |   |   |   |   |   |   |     |                   |                   |
| <b>White ethnicity</b>                      |    |                   |                   |   |   |   |   |   |   |     |                   |                   |
| First dose/positive test (before vaccine)   | 48 | 1.01 (0.74, 1.38) | 1 (Ref)           | 0 | - | - | 0 | - | - | 166 | 1.08 (0.92, 1.28) | 1 (Ref)           |
| Second dose/positive test (after vaccine)   | 8  | 0.93 (0.45, 1.93) | 1 (Ref)           | 0 | - | - | 0 | - | - | 0   | -                 | -                 |
| Third dose                                  | 0  | -                 | -                 | 0 | - | - | 0 | - | - |     |                   |                   |
| <b>Non-white ethnicity</b>                  |    |                   |                   |   |   |   |   |   |   |     |                   |                   |
| First dose/positive test (before vaccine)   | 13 | 1.20 (0.64, 2.24) | 1.38 (0.73, 2.64) | 0 | - | - | 0 | - | - | 29  | 1.49 (1.00, 2.23) | 1.14 (0.75, 1.73) |

|                                           |    |   |   |   |   |   |   |   |   |    |                   |                   |
|-------------------------------------------|----|---|---|---|---|---|---|---|---|----|-------------------|-------------------|
| Second dose/positive test (after vaccine) | 0  | - | - | 0 | - | - | 0 | - | - | 0  | -                 | -                 |
| Third dose                                | 0  | - | - | 0 | - | - | 0 | - | - |    |                   |                   |
| <b>Guillain-Barre syndrome</b>            |    |   |   |   |   |   |   |   |   |    |                   |                   |
| <b>White ethnicity</b>                    |    |   |   |   |   |   |   |   |   |    |                   |                   |
| First dose/positive test (before vaccine) | 0  | - | - | 0 | - | - | 0 | - | - | 0  | -                 | -                 |
| Second dose/positive test (after vaccine) | 0  | - | - | 0 | - | - | 0 | - | - | 0  | -                 | -                 |
| Third dose                                | 0  | - | - | 0 | - | - | 0 | - | - |    |                   |                   |
| <b>Non-white ethnicity</b>                |    |   |   |   |   |   |   |   |   |    |                   |                   |
| First dose/positive test (before vaccine) | 0  | - | - | 0 | - | - | 0 | - | - | 0  | -                 | -                 |
| Second dose/positive test (after vaccine) | 0  | - | - | 0 | - | - | 0 | - | - | 0  | -                 | -                 |
| Third dose                                | 0  | - | - | 0 | - | - | 0 | - | - |    |                   |                   |
| <b>Angioedema</b>                         |    |   |   |   |   |   |   |   |   |    |                   |                   |
| <b>White ethnicity</b>                    |    |   |   |   |   |   |   |   |   |    |                   |                   |
| First dose/positive test (before vaccine) | <5 | - | - | 0 | - | - | 0 | - | - | 10 | 1.13 (0.56, 2.25) | 1 (Ref)           |
| Second dose/positive test (after vaccine) | 0  | - | - | 0 | - | - | 0 | - | - | 0  | -                 | -                 |
| Third dose                                | 0  | - | - | 0 | - | - | 0 | - | - |    |                   |                   |
| <b>Non-white ethnicity</b>                |    |   |   |   |   |   |   |   |   |    |                   |                   |
| First dose/positive test (before vaccine) | <5 | - | - | 0 | - | - | 0 | - | - | 0  | -                 | -                 |
| Second dose/positive test (after vaccine) | 0  | - | - | 0 | - | - | 0 | - | - | 0  | -                 | -                 |
| Third dose                                | 0  | - | - | 0 | - | - | 0 | - | - |    |                   |                   |
| <b>Anaphylaxis</b>                        |    |   |   |   |   |   |   |   |   |    |                   |                   |
| <b>White ethnicity</b>                    |    |   |   |   |   |   |   |   |   |    |                   |                   |
| First dose/positive test (before vaccine) | 0  | - | - | 0 | - | - | 0 | - | - | 11 | 1.04 (0.54, 2.01) | 1 (Ref)           |
| Second dose/positive test (after vaccine) | 0  | - | - | 0 | - | - | 0 | - | - | 0  | -                 | -                 |
| Third dose                                | 0  | - | - | 0 | - | - | 0 | - | - |    |                   |                   |
| <b>Non-white ethnicity</b>                |    |   |   |   |   |   |   |   |   |    |                   |                   |
| First dose/positive test (before vaccine) | <5 | - | - | 0 | - | - | 0 | - | - | 12 | 2.02 (0.99, 4.14) | 2.22 (0.93, 5.32) |
| Second dose/positive test (after vaccine) | 0  | - | - | 0 | - | - | 0 | - | - | 0  | -                 | -                 |
| Third dose                                | 0  | - | - | 0 | - | - | 0 | - | - |    |                   |                   |

| <b>12-17 years</b>                           |    |                   |                   |    |   |   |    |   |   |    |                      |                   |
|----------------------------------------------|----|-------------------|-------------------|----|---|---|----|---|---|----|----------------------|-------------------|
| <b>Multisystem inflammatory syndrome</b>     |    |                   |                   |    |   |   |    |   |   |    |                      |                   |
| <b>White ethnicity</b>                       |    |                   |                   |    |   |   |    |   |   |    |                      |                   |
| First dose/positive test (before vaccine)    | 15 | 0.91 (0.45, 1.85) | 1 (Ref)           | 0  | - | - | 0  | - | - | 63 | 10.29 (6.83, 15.51)  | 1 (Ref)           |
| Second dose/positive test (after vaccine)    | <5 | -                 | -                 | 0  | - | - | 0  | - | - | <5 | -                    | -                 |
| Third dose                                   | <5 | -                 | -                 | 0  | - | - | 0  | - | - |    |                      |                   |
| <b>Non-white ethnicity</b>                   |    |                   |                   |    |   |   |    |   |   |    |                      |                   |
| First dose/positive test (before vaccine)    | 6  | 0.54 (0.17, 1.68) | 0.47 (0.14, 1.59) | 0  | - | - | 0  | - | - | 31 | 19.50 (10.04, 37.87) | 1.55 (0.74, 3.25) |
| Second dose/positive test (after vaccine)    | <5 | -                 | -                 | 0  | - | - | 0  | - | - | <5 | -                    | -                 |
| Third dose                                   | 0  | -                 | -                 | 0  | - | - | 0  | - | - |    |                      |                   |
| <b>Myocarditis</b>                           |    |                   |                   |    |   |   |    |   |   |    |                      |                   |
| <b>White ethnicity</b>                       |    |                   |                   |    |   |   |    |   |   |    |                      |                   |
| First dose/positive test (before vaccine)    | 14 | 1.68 (0.87, 3.25) | 1 (Ref)           | <5 | - | - | 0  | - | - | 5  | 3.56 (1.23, 10.27)   | 1 (Ref)           |
| Second dose/positive test (after vaccine)    | 13 | 2.61 (1.34, 5.08) | 1 (Ref)           | 0  | - | - | 0  | - | - | <5 | -                    | -                 |
| Third dose                                   | <5 | -                 | -                 | 0  | - | - | <5 | - | - |    |                      |                   |
| <b>Non-white ethnicity</b>                   |    |                   |                   |    |   |   |    |   |   |    |                      |                   |
| First dose/positive test (before vaccine)    | <5 | -                 | -                 | 0  | - | - | 0  | - | - | <5 | -                    | -                 |
| Second dose/positive test (after vaccine)    | <5 | -                 | -                 | 0  | - | - | 0  | - | - | 0  | -                    | -                 |
| Third dose                                   | 0  | -                 | -                 | 0  | - | - | 0  | - | - |    |                      |                   |
| <b>Immune or idiopathic thrombocytopenia</b> |    |                   |                   |    |   |   |    |   |   |    |                      |                   |
| <b>White ethnicity</b>                       |    |                   |                   |    |   |   |    |   |   |    |                      |                   |
| First dose/positive test (before vaccine)    | 34 | 0.89 (0.61, 1.29) | 1 (Ref)           | <5 | - | - | 0  | - | - | 26 | 1.86 (1.22, 2.82)    | 1 (Ref)           |
| Second dose/positive test (after vaccine)    | 27 | 1.02 (0.67, 1.54) | 1 (Ref)           | <5 | - | - | 0  | - | - | 5  | 1.64 (0.67, 4.06)    | 1 (Ref)           |
| Third dose                                   | 6  | 0.56 (0.25, 1.29) | 1 (Ref)           | 0  | - | - | 0  | - | - |    |                      |                   |
| <b>Non-white ethnicity</b>                   |    |                   |                   |    |   |   |    |   |   |    |                      |                   |
| First dose/positive test (before vaccine)    | <5 | -                 | -                 | 0  | - | - | 0  | - | - | 7  | 1.71 (0.76, 3.85)    | 0.87 (0.36, 2.12) |
| Second dose/positive test (after vaccine)    | <5 | -                 | -                 | 0  | - | - | 0  | - | - | 0  | -                    | -                 |
| Third dose                                   | <5 | -                 | -                 | 0  | - | - | 0  | - | - |    |                      |                   |
| <b>Epilepsy</b>                              |    |                   |                   |    |   |   |    |   |   |    |                      |                   |

| <b>White ethnicity</b>                      |     |                   |                   |    |                   |         |    |                   |         |    |                   |                   |
|---------------------------------------------|-----|-------------------|-------------------|----|-------------------|---------|----|-------------------|---------|----|-------------------|-------------------|
| First dose/positive test (before vaccine)   | 167 | 1.03 (0.87, 1.22) | 1 (Ref)           | 12 | 1.94 (1.03, 3.65) | 1 (Ref) | 0  | -                 | -       | 56 | 1.25 (0.95, 1.65) | 1 (Ref)           |
| Second dose/positive test (after vaccine)   | 156 | 1.19 (1.00, 1.41) | 1 (Ref)           | 8  | 1.33 (0.62, 2.81) | 1 (Ref) | <5 | -                 | -       | 17 | 1.43 (0.88, 2.33) | 1 (Ref)           |
| Third dose                                  | 40  | 0.82 (0.59, 1.14) | 1 (Ref)           | 0  | -                 | -       | 6  | 1.13 (0.45, 2.83) | 1 (Ref) |    |                   |                   |
| <b>Non-white ethnicity</b>                  |     |                   |                   |    |                   |         |    |                   |         |    |                   |                   |
| First dose/positive test (before vaccine)   | 33  | 1.06 (0.72, 1.54) | 1.05 (0.71, 1.56) | <5 | -                 | -       | 0  | -                 | -       | 13 | 1.35 (0.76, 2.40) | 1.09 (0.58, 2.05) |
| Second dose/positive test (after vaccine)   | 22  | 1.04 (0.66, 1.63) | 0.87 (0.55, 1.40) | <5 | -                 | -       | 0  | -                 | -       | <5 | -                 | -                 |
| Third dose                                  | <5  | -                 | -                 | 0  | -                 | -       | 0  | -                 | -       |    |                   |                   |
| <b>Acute pancreatitis</b>                   |     |                   |                   |    |                   |         |    |                   |         |    |                   |                   |
| <b>White ethnicity</b>                      |     |                   |                   |    |                   |         |    |                   |         |    |                   |                   |
| First dose/positive test (before vaccine)   | 20  | 1.25 (0.76, 2.07) | 1 (Ref)           | <5 | -                 | -       | 0  | -                 | -       | <5 | -                 | -                 |
| Second dose/positive test (after vaccine)   | 10  | 0.91 (0.46, 1.78) | 1 (Ref)           | 0  | -                 | -       | 0  | -                 | -       | <5 | -                 | -                 |
| Third dose                                  | <5  | -                 | -                 | 0  | -                 | -       | 0  | -                 | -       |    |                   |                   |
| <b>Non-white ethnicity</b>                  |     |                   |                   |    |                   |         |    |                   |         |    |                   |                   |
| First dose/positive test (before vaccine)   | 5   | 1.07 (0.37, 3.13) | 0.63 (0.20, 1.95) | 0  | -                 | -       | 0  | -                 | -       | <5 | -                 | -                 |
| Second dose/positive test (after vaccine)   | 0   | -                 | -                 | 0  | -                 | -       | 0  | -                 | -       | 0  | -                 | -                 |
| Third dose                                  | 0   | -                 | -                 | 0  | -                 | -       | 0  | -                 | -       |    |                   |                   |
| <b>Myositis</b>                             |     |                   |                   |    |                   |         |    |                   |         |    |                   |                   |
| <b>White ethnicity</b>                      |     |                   |                   |    |                   |         |    |                   |         |    |                   |                   |
| First dose/positive test (before vaccine)   | <5  | -                 | -                 | 0  | -                 | -       | 0  | -                 | -       | <5 | -                 | -                 |
| Second dose/positive test (after vaccine)   | <5  | -                 | -                 | <5 | -                 | -       | 0  | -                 | -       | 0  | -                 | -                 |
| Third dose                                  | <5  | -                 | -                 | 0  | -                 | -       | 0  | -                 | -       |    |                   |                   |
| <b>Non-white ethnicity</b>                  |     |                   |                   |    |                   |         |    |                   |         |    |                   |                   |
| First dose/positive test (before vaccine)   | <5  | -                 | -                 | 0  | -                 | -       | 0  | -                 | -       | 0  | -                 | -                 |
| Second dose/positive test (after vaccine)   | 0   | -                 | -                 | 0  | -                 | -       | 0  | -                 | -       | 0  | -                 | -                 |
| Third dose                                  | 0   | -                 | -                 | 0  | -                 | -       | 0  | -                 | -       |    |                   |                   |
| <b>Acute disseminated encephalomyelitis</b> |     |                   |                   |    |                   |         |    |                   |         |    |                   |                   |
| <b>White ethnicity</b>                      |     |                   |                   |    |                   |         |    |                   |         |    |                   |                   |
| First dose/positive test (before vaccine)   | <5  | -                 | -                 | 0  | -                 | -       | 0  | -                 | -       | <5 | -                 | -                 |

|                                           |     |                   |                   |    |                    |         |    |                   |         |     |                   |                   |
|-------------------------------------------|-----|-------------------|-------------------|----|--------------------|---------|----|-------------------|---------|-----|-------------------|-------------------|
| Second dose/positive test (after vaccine) | 5   | 1.22 (0.46, 3.24) | 1 (Ref)           | 0  | -                  | -       | 0  | -                 | -       | <5  | -                 | -                 |
| Third dose                                | 0   | -                 | -                 | 0  | -                  | -       | 0  | -                 | -       |     |                   |                   |
| <b>Non-white ethnicity</b>                |     |                   |                   |    |                    |         |    |                   |         |     |                   |                   |
| First dose/positive test (before vaccine) | <5  | -                 | -                 | 0  | -                  | -       | 0  | -                 | -       | 0   | -                 | -                 |
| Second dose/positive test (after vaccine) | <5  | -                 | -                 | 0  | -                  | -       | 0  | -                 | -       | <5  | -                 | -                 |
| Third dose                                | 0   | -                 | -                 | 0  | -                  | -       | 0  | -                 | -       |     |                   |                   |
| <b>Demyelinating disease</b>              |     |                   |                   |    |                    |         |    |                   |         |     |                   |                   |
| <b>White ethnicity</b>                    |     |                   |                   |    |                    |         |    |                   |         |     |                   |                   |
| First dose/positive test (before vaccine) | 7   | 1.27 (0.56, 2.90) | 1 (Ref)           | 0  | -                  | -       | 0  | -                 | -       | <5  | -                 | -                 |
| Second dose/positive test (after vaccine) | 8   | 1.69 (0.77, 3.72) | 1 (Ref)           | 0  | -                  | -       | 0  | -                 | -       | <5  | -                 | -                 |
| Third dose                                | <5  | -                 | -                 | 0  | -                  | -       | 0  | -                 | -       |     |                   |                   |
| <b>Non-white ethnicity</b>                |     |                   |                   |    |                    |         |    |                   |         |     |                   |                   |
| First dose/positive test (before vaccine) | 0   | -                 | -                 | 0  | -                  | -       | 0  | -                 | -       | 0   | -                 | -                 |
| Second dose/positive test (after vaccine) | <5  | -                 | -                 | 0  | -                  | -       | 0  | -                 | -       | 0   | -                 | -                 |
| Third dose                                | 0   | -                 | -                 | 0  | -                  | -       | 0  | -                 | -       |     |                   |                   |
| <b>Appendicitis</b>                       |     |                   |                   |    |                    |         |    |                   |         |     |                   |                   |
| <b>White ethnicity</b>                    |     |                   |                   |    |                    |         |    |                   |         |     |                   |                   |
| First dose/positive test (before vaccine) | 373 | 0.89 (0.79, 1.00) | 1 (Ref)           | <5 | -                  | -       | 0  | -                 | -       | 171 | 1.07 (0.91, 1.25) | 1 (Ref)           |
| Second dose/positive test (after vaccine) | 271 | 0.88 (0.77, 1.01) | 1 (Ref)           | 6  | 6.02 (2.20, 16.49) | 1 (Ref) | 0  | -                 | -       | 19  | 0.69 (0.44, 1.09) | 1 (Ref)           |
| Third dose                                | 60  | 1.14 (0.87, 1.49) | 1 (Ref)           | 0  | -                  | -       | 8  | 1.27 (0.61, 2.62) | 1 (Ref) |     |                   |                   |
| <b>Non-white ethnicity</b>                |     |                   |                   |    |                    |         |    |                   |         |     |                   |                   |
| First dose/positive test (before vaccine) | 53  | 0.95 (0.70, 1.29) | 1.02 (0.75, 1.37) | 0  | -                  | -       | 0  | -                 | -       | 30  | 1.30 (0.89, 1.91) | 1.15 (0.77, 1.73) |
| Second dose/positive test (after vaccine) | 36  | 0.95 (0.66, 1.36) | 1.07 (0.74, 1.54) | 0  | -                  | -       | 0  | -                 | -       | <5  | -                 | -                 |
| Third dose                                | <5  | -                 | -                 | 0  | -                  | -       | <5 | -                 | -       |     |                   |                   |
| <b>Guillain-Barre syndrome</b>            |     |                   |                   |    |                    |         |    |                   |         |     |                   |                   |
| <b>White ethnicity</b>                    |     |                   |                   |    |                    |         |    |                   |         |     |                   |                   |
| First dose/positive test (before vaccine) | <5  | -                 | -                 | 0  | -                  | -       | 0  | -                 | -       | <5  | -                 | -                 |
| Second dose/positive test (after vaccine) | <5  | -                 | -                 | 0  | -                  | -       | 0  | -                 | -       | <5  | -                 | -                 |
| Third dose                                | 0   | -                 | -                 | 0  | -                  | -       | 0  | -                 | -       |     |                   |                   |

|                                           |    |                   |                   |    |   |   |    |   |   |    |                   |         |
|-------------------------------------------|----|-------------------|-------------------|----|---|---|----|---|---|----|-------------------|---------|
| <b>Non-white ethnicity</b>                |    |                   |                   |    |   |   |    |   |   |    |                   |         |
| First dose/positive test (before vaccine) | 0  | -                 | -                 | 0  | - | - | 0  | - | - | <5 | -                 | -       |
| Second dose/positive test (after vaccine) | 0  | -                 | -                 | 0  | - | - | 0  | - | - | 0  | -                 | -       |
| Third dose                                | 0  | -                 | -                 | 0  | - | - | 0  | - | - |    |                   |         |
| <b>Angioedema</b>                         |    |                   |                   |    |   |   |    |   |   |    |                   |         |
| <b>White ethnicity</b>                    |    |                   |                   |    |   |   |    |   |   |    |                   |         |
| First dose/positive test (before vaccine) | 18 | 1.25 (0.74, 2.14) | 1 (Ref)           | 0  | - | - | 0  | - | - | 6  | 1.00 (0.43, 2.33) | 1 (Ref) |
| Second dose/positive test (after vaccine) | 7  | 0.67 (0.30, 1.47) | 1 (Ref)           | <5 | - | - | 0  | - | - | <5 | -                 | -       |
| Third dose                                | <5 | -                 | -                 | 0  | - | - | <5 | - | - |    |                   |         |
| <b>Non-white ethnicity</b>                |    |                   |                   |    |   |   |    |   |   |    |                   |         |
| First dose/positive test (before vaccine) | 7  | 2.12 (0.88, 5.15) | 1.44 (0.56, 3.67) | <5 | - | - | 0  | - | - | <5 | -                 | -       |
| Second dose/positive test (after vaccine) | 5  | 1.79 (0.65, 4.92) | 2.78 (0.82, 9.38) | 0  | - | - | 0  | - | - | 0  | -                 | -       |
| Third dose                                | <5 | -                 | -                 | 0  | - | - | 0  | - | - |    |                   |         |
| <b>Anaphylaxis</b>                        |    |                   |                   |    |   |   |    |   |   |    |                   |         |
| <b>White ethnicity</b>                    |    |                   |                   |    |   |   |    |   |   |    |                   |         |
| First dose/positive test (before vaccine) | 27 | 1.13 (0.74, 1.74) | 1 (Ref)           | 0  | - | - | 0  | - | - | 14 | 1.55 (0.88, 2.72) | 1 (Ref) |
| Second dose/positive test (after vaccine) | 11 | 0.60 (0.32, 1.13) | 1 (Ref)           | 0  | - | - | 0  | - | - | <5 | -                 | -       |
| Third dose                                | 5  | 1.21 (0.47, 3.10) | 1 (Ref)           | 0  | - | - | <5 | - | - |    |                   |         |
| <b>Non-white ethnicity</b>                |    |                   |                   |    |   |   |    |   |   |    |                   |         |
| First dose/positive test (before vaccine) | 15 | 1.83 (0.99, 3.38) | 1.49 (0.76, 2.93) | 0  | - | - | 0  | - | - | <5 | -                 | -       |
| Second dose/positive test (after vaccine) | 9  | 1.69 (0.80, 3.54) | 2.55 (1.00, 6.46) | 0  | - | - | 0  | - | - | <5 | -                 | -       |
| Third dose                                | <5 | -                 | -                 | 0  | - | - | 0  | - | - |    |                   |         |
| <b>18-24 years</b>                        |    |                   |                   |    |   |   |    |   |   |    |                   |         |
| <b>Multisystem inflammatory syndrome</b>  |    |                   |                   |    |   |   |    |   |   |    |                   |         |
| <b>White ethnicity</b>                    |    |                   |                   |    |   |   |    |   |   |    |                   |         |
| First dose/positive test (before vaccine) | <5 | -                 | -                 | <5 | - | - | 0  | - | - | <5 | -                 | -       |
| Second dose/positive test (after vaccine) | <5 | -                 | -                 | <5 | - | - | 0  | - | - | <5 | -                 | -       |
| Third dose                                | 0  | -                 | -                 | 0  | - | - | 0  | - | - |    |                   |         |
| <b>Non-white ethnicity</b>                |    |                   |                   |    |   |   |    |   |   |    |                   |         |



|                                              |     |                    |                   |     |                   |                   |    |                     |         |    |                    |                    |
|----------------------------------------------|-----|--------------------|-------------------|-----|-------------------|-------------------|----|---------------------|---------|----|--------------------|--------------------|
| First dose/positive test (before vaccine)    | <5  | -                  | -                 | 0   | -                 | -                 | 0  | -                   | -       | <5 | -                  | -                  |
| Second dose/positive test (after vaccine)    | 0   | -                  | -                 | 0   | -                 | -                 | 0  | -                   | -       | 0  | -                  | -                  |
| Third dose                                   | 0   | -                  | -                 | 0   | -                 | -                 | 0  | -                   | -       |    |                    |                    |
| <b>Myocarditis</b>                           |     |                    |                   |     |                   |                   |    |                     |         |    |                    |                    |
| <b>White ethnicity</b>                       |     |                    |                   |     |                   |                   |    |                     |         |    |                    |                    |
| First dose/positive test (before vaccine)    | 16  | 0.80 (0.46, 1.41)  | 1 (Ref)           | 5   | 2.17 (0.80, 5.92) | 1 (Ref)           | 7  | 2.01 (0.79, 5.13)   | 1 (Ref) | 8  | 1.85 (0.87, 3.92)  | 1 (Ref)            |
| Second dose/positive test (after vaccine)    | 39  | 2.31 (1.56, 3.43)  | 1 (Ref)           | 9   | 2.03 (0.94, 4.40) | 1 (Ref)           | 23 | 10.54 (5.49, 20.22) | 1 (Ref) | <5 | -                  | -                  |
| Third dose                                   | 24  | 3.02 (1.83, 5.00)  | 1 (Ref)           | 0   | -                 | -                 | 10 | 4.05 (1.87, 8.81)   | 1 (Ref) |    |                    |                    |
| <b>Non-white ethnicity</b>                   |     |                    |                   |     |                   |                   |    |                     |         |    |                    |                    |
| First dose/positive test (before vaccine)    | <5  | -                  | -                 | 0   | -                 | -                 | <5 | -                   | -       | 7  | 7.63 (2.77, 20.96) | 3.46 (1.05, 11.44) |
| Second dose/positive test (after vaccine)    | 5   | 3.99 (1.36, 11.66) | 1.37 (0.47, 4.01) | 0   | -                 | -                 | <5 | -                   | -       | 0  | -                  | -                  |
| Third dose                                   | <5  | -                  | -                 | 0   | -                 | -                 | <5 | -                   | -       |    |                    |                    |
| <b>Immune or idiopathic thrombocytopenia</b> |     |                    |                   |     |                   |                   |    |                     |         |    |                    |                    |
| <b>White ethnicity</b>                       |     |                    |                   |     |                   |                   |    |                     |         |    |                    |                    |
| First dose/positive test (before vaccine)    | 31  | 0.64 (0.44, 0.94)  | 1 (Ref)           | 27  | 1.24 (0.80, 1.93) | 1 (Ref)           | <5 | -                   | -       | 37 | 3.79 (2.62, 5.49)  | 1 (Ref)            |
| Second dose/positive test (after vaccine)    | 42  | 1.08 (0.78, 1.50)  | 1 (Ref)           | 25  | 1.12 (0.72, 1.75) | 1 (Ref)           | 5  | 1.31 (0.51, 3.33)   | 1 (Ref) | 11 | 2.07 (1.12, 3.83)  | 1 (Ref)            |
| Third dose                                   | 25  | 0.78 (0.50, 1.22)  | 1 (Ref)           | 0   | -                 | -                 | 8  | 0.85 (0.41, 1.78)   | 1 (Ref) |    |                    |                    |
| <b>Non-white ethnicity</b>                   |     |                    |                   |     |                   |                   |    |                     |         |    |                    |                    |
| First dose/positive test (before vaccine)    | 13  | 1.04 (0.57, 1.88)  | 1.53 (0.77, 3.02) | 6   | 1.84 (0.73, 4.62) | 1.26 (0.49, 3.25) | <5 | -                   | -       | 14 | 4.62 (2.49, 8.57)  | 1.13 (0.56, 2.29)  |
| Second dose/positive test (after vaccine)    | 7   | 0.63 (0.29, 1.37)  | 0.59 (0.26, 1.36) | <5  | -                 | -                 | 0  | -                   | -       | <5 | -                  | -                  |
| Third dose                                   | 6   | 0.87 (0.34, 2.21)  | 1.14 (0.41, 3.12) | 0   | -                 | -                 | <5 | -                   | -       |    |                    |                    |
| <b>Epilepsy</b>                              |     |                    |                   |     |                   |                   |    |                     |         |    |                    |                    |
| <b>White ethnicity</b>                       |     |                    |                   |     |                   |                   |    |                     |         |    |                    |                    |
| First dose/positive test (before vaccine)    | 120 | 0.81 (0.67, 0.98)  | 1 (Ref)           | 166 | 1.15 (0.59, 2.25) | 1 (Ref)           | 5  | 0.55 (0.22, 1.36)   | 1 (Ref) | 54 | 1.39 (1.05, 1.85)  | 1 (Ref)            |
| Second dose/positive test (after vaccine)    | 119 | 0.87 (0.72, 1.05)  | 1 (Ref)           | 165 | 1.38 (0.77, 2.47) | 1 (Ref)           | <5 | -                   | -       | 35 | 1.49 (1.06, 2.09)  | 1 (Ref)            |
| Third dose                                   | 142 | 1.05 (0.87, 1.27)  | 1 (Ref)           | <5  | -                 | -                 | 35 | 0.83 (0.58, 1.20)   | 1 (Ref) |    |                    |                    |
| <b>Non-white ethnicity</b>                   |     |                    |                   |     |                   |                   |    |                     |         |    |                    |                    |
| First dose/positive test (before vaccine)    | 30  | 1.32 (0.90, 1.95)  | 1.60 (1.05, 2.45) | 18  | 1.20 (0.38, 3.83) | 0.81 (0.49, 1.34) | <5 | -                   | -       | 16 | 2.42 (1.41, 4.15)  | 1.75 (0.96, 3.20)  |

|                                             |    |                   |                   |    |                   |                   |    |                   |         |    |                   |                   |
|---------------------------------------------|----|-------------------|-------------------|----|-------------------|-------------------|----|-------------------|---------|----|-------------------|-------------------|
| Second dose/positive test (after vaccine)   | 16 | 0.87 (0.52, 1.46) | 0.95 (0.55, 1.64) | 22 | 0.72 (0.16, 3.32) | 1.04 (0.65, 1.66) | <5 | -                 | -       | <5 | -                 | -                 |
| Third dose                                  | 11 | 0.66 (0.34, 1.26) | 0.64 (0.33, 1.25) | 0  | -                 | -                 | <5 | -                 | -       |    |                   |                   |
| <b>Acute pancreatitis</b>                   |    |                   |                   |    |                   |                   |    |                   |         |    |                   |                   |
| <b>White ethnicity</b>                      |    |                   |                   |    |                   |                   |    |                   |         |    |                   |                   |
| First dose/positive test (before vaccine)   | 51 | 0.99 (0.72, 1.35) | 1 (Ref)           | 9  | 0.49 (0.24, 0.97) | 1 (Ref)           | 8  | 1.91 (0.89, 4.14) | 1 (Ref) | 22 | 1.83 (1.16, 2.87) | 1 (Ref)           |
| Second dose/positive test (after vaccine)   | 47 | 1.05 (0.76, 1.45) | 1 (Ref)           | 23 | 1.19 (0.75, 1.88) | 1 (Ref)           | <5 | -                 | -       | 6  | 0.92 (0.41, 2.08) | 1 (Ref)           |
| Third dose                                  | 33 | 1.26 (0.85, 1.85) | 1 (Ref)           | <5 | -                 | -                 | 10 | 0.94 (0.48, 1.83) | 1 (Ref) |    |                   |                   |
| <b>Non-white ethnicity</b>                  |    |                   |                   |    |                   |                   |    |                   |         |    |                   |                   |
| First dose/positive test (before vaccine)   | 9  | 1.13 (0.55, 2.36) | 0.90 (0.43, 1.89) | 0  | -                 | -                 | 0  | -                 | -       | 5  | 1.95 (0.75, 5.12) | 0.86 (0.31, 2.43) |
| Second dose/positive test (after vaccine)   | 7  | 1.14 (0.51, 2.57) | 0.85 (0.37, 1.95) | <5 | -                 | -                 | <5 | -                 | -       | 0  | -                 | -                 |
| Third dose                                  | <5 | -                 | -                 | 0  | -                 | -                 | <5 | -                 | -       |    |                   |                   |
| <b>Myositis</b>                             |    |                   |                   |    |                   |                   |    |                   |         |    |                   |                   |
| <b>White ethnicity</b>                      |    |                   |                   |    |                   |                   |    |                   |         |    |                   |                   |
| First dose/positive test (before vaccine)   | <5 | -                 | -                 | 0  | -                 | -                 | 0  | -                 | -       | <5 | -                 | -                 |
| Second dose/positive test (after vaccine)   | <5 | -                 | -                 | 0  | -                 | -                 | <5 | -                 | -       | <5 | -                 | -                 |
| Third dose                                  | <5 | -                 | -                 | 0  | -                 | -                 | 0  | -                 | -       |    |                   |                   |
| <b>Non-white ethnicity</b>                  |    |                   |                   |    |                   |                   |    |                   |         |    |                   |                   |
| First dose/positive test (before vaccine)   | <5 | -                 | -                 | <5 | -                 | -                 | 0  | -                 | -       | 0  | -                 | -                 |
| Second dose/positive test (after vaccine)   | 0  | -                 | -                 | 0  | -                 | -                 | 0  | -                 | -       | 0  | -                 | -                 |
| Third dose                                  | 0  | -                 | -                 | 0  | -                 | -                 | 0  | -                 | -       |    |                   |                   |
| <b>Acute disseminated encephalomyelitis</b> |    |                   |                   |    |                   |                   |    |                   |         |    |                   |                   |
| <b>White ethnicity</b>                      |    |                   |                   |    |                   |                   |    |                   |         |    |                   |                   |
| First dose/positive test (before vaccine)   | 9  | 2.05 (0.95, 4.42) | 1 (Ref)           | <5 | -                 | -                 | 0  | -                 | -       | <5 | -                 | -                 |
| Second dose/positive test (after vaccine)   | 6  | 1.51 (0.61, 3.75) | 1 (Ref)           | <5 | -                 | -                 | <5 | -                 | -       | <5 | -                 | -                 |
| Third dose                                  | <5 | -                 | -                 | 0  | -                 | -                 | <5 | -                 | -       |    |                   |                   |
| <b>Non-white ethnicity</b>                  |    |                   |                   |    |                   |                   |    |                   |         |    |                   |                   |
| First dose/positive test (before vaccine)   | 0  | -                 | -                 | 0  | -                 | -                 | <5 | -                 | -       | 0  | -                 | -                 |
| Second dose/positive test (after vaccine)   | 0  | -                 | -                 | <5 | -                 | -                 | 0  | -                 | -       | 0  | -                 | -                 |
| Third dose                                  | 0  | -                 | -                 | 0  | -                 | -                 | 0  | -                 | -       |    |                   |                   |

| <b>Demyelinating disease</b>              |     |                   |                   |    |                   |                   |    |                   |                   |    |                   |                   |
|-------------------------------------------|-----|-------------------|-------------------|----|-------------------|-------------------|----|-------------------|-------------------|----|-------------------|-------------------|
| <b>White ethnicity</b>                    |     |                   |                   |    |                   |                   |    |                   |                   |    |                   |                   |
| First dose/positive test (before vaccine) | 8   | 0.59 (0.28, 1.25) | 1 (Ref)           | 6  | 1.17 (0.46, 2.95) | 1 (Ref)           | 0  | -                 | -                 | <5 | -                 | -                 |
| Second dose/positive test (after vaccine) | 7   | 0.63 (0.28, 1.37) | 1 (Ref)           | <5 | -                 | -                 | <5 | -                 | -                 | <5 | -                 | -                 |
| Third dose                                | 7   | 0.86 (0.38, 1.97) | 1 (Ref)           | 0  | -                 | -                 | <5 | -                 | -                 |    |                   |                   |
| <b>Non-white ethnicity</b>                |     |                   |                   |    |                   |                   |    |                   |                   |    |                   |                   |
| First dose/positive test (before vaccine) | <5  | -                 | -                 | 0  | -                 | -                 | 0  | -                 | -                 | <5 | -                 | -                 |
| Second dose/positive test (after vaccine) | <5  | -                 | -                 | 0  | -                 | -                 | 0  | -                 | -                 | 0  | -                 | -                 |
| Third dose                                | <5  | -                 | -                 | 0  | -                 | -                 | 0  | -                 | -                 |    |                   |                   |
| <b>Appendicitis</b>                       |     |                   |                   |    |                   |                   |    |                   |                   |    |                   |                   |
| <b>White ethnicity</b>                    |     |                   |                   |    |                   |                   |    |                   |                   |    |                   |                   |
| First dose/positive test (before vaccine) | 355 | 0.98 (0.86, 1.11) | 1 (Ref)           | 89 | 1.07 (0.85, 1.35) | 1 (Ref)           | 47 | 1.19 (0.87, 1.64) | 1 (Ref)           | 89 | 1.27 (1.02, 1.58) | 1 (Ref)           |
| Second dose/positive test (after vaccine) | 300 | 0.97 (0.85, 1.10) | 1 (Ref)           | 80 | 1.07 (0.84, 1.36) | 1 (Ref)           | 39 | 1.22 (0.87, 1.70) | 1 (Ref)           | 42 | 1.15 (0.84, 1.56) | 1 (Ref)           |
| Third dose                                | 157 | 0.99 (0.83, 1.18) | 1 (Ref)           | 0  | -                 | -                 | 79 | 1.06 (0.84, 1.35) | 1 (Ref)           |    |                   |                   |
| <b>Non-white ethnicity</b>                |     |                   |                   |    |                   |                   |    |                   |                   |    |                   |                   |
| First dose/positive test (before vaccine) | 59  | 1.08 (0.80, 1.44) | 1.06 (0.79, 1.42) | 8  | 1.01 (0.48, 2.11) | 0.74 (0.35, 1.57) | 5  | 0.79 (0.32, 1.97) | 0.67 (0.26, 1.76) | 17 | 1.22 (0.74, 2.01) | 0.88 (0.51, 1.52) |
| Second dose/positive test (after vaccine) | 35  | 0.70 (0.49, 1.00) | 0.79 (0.55, 1.13) | 5  | 0.60 (0.24, 1.50) | 0.52 (0.20, 1.31) | 5  | 0.93 (0.37, 2.34) | 0.85 (0.32, 2.26) | 9  | 2.40 (1.22, 4.76) | 2.22 (1.06, 4.66) |
| Third dose                                | 18  | 0.96 (0.58, 1.58) | 1.02 (0.62, 1.70) | 0  | -                 | -                 | 6  | 1.05 (0.45, 2.45) | 1.08 (0.46, 2.57) |    |                   |                   |
| <b>Guillain-Barre syndrome</b>            |     |                   |                   |    |                   |                   |    |                   |                   |    |                   |                   |
| <b>White ethnicity</b>                    |     |                   |                   |    |                   |                   |    |                   |                   |    |                   |                   |
| First dose/positive test (before vaccine) | <5  | -                 | -                 | 0  | -                 | -                 | <5 | -                 | -                 | 0  | -                 | -                 |
| Second dose/positive test (after vaccine) | <5  | -                 | -                 | 0  | -                 | -                 | 0  | -                 | -                 | 0  | -                 | -                 |
| Third dose                                | <5  | -                 | -                 | 0  | -                 | -                 | <5 | -                 | -                 |    |                   |                   |
| <b>Non-white ethnicity</b>                |     |                   |                   |    |                   |                   |    |                   |                   |    |                   |                   |
| First dose/positive test (before vaccine) | 0   | -                 | -                 | <5 | -                 | -                 | 0  | -                 | -                 | <5 | -                 | -                 |
| Second dose/positive test (after vaccine) | <5  | -                 | -                 | 0  | -                 | -                 | 0  | -                 | -                 | 0  | -                 | -                 |
| Third dose                                | <5  | -                 | -                 | 0  | -                 | -                 | <5 | -                 | -                 |    |                   |                   |
| <b>Angioedema</b>                         |     |                   |                   |    |                   |                   |    |                   |                   |    |                   |                   |
| <b>White ethnicity</b>                    |     |                   |                   |    |                   |                   |    |                   |                   |    |                   |                   |

|                                           |    |                   |                   |    |                   |         |    |                   |         |    |                   |         |
|-------------------------------------------|----|-------------------|-------------------|----|-------------------|---------|----|-------------------|---------|----|-------------------|---------|
| First dose/positive test (before vaccine) | 17 | 0.67 (0.39, 1.15) | 1 (Ref)           | 16 | 1.32 (0.74, 2.37) | 1 (Ref) | <5 | -                 | -       | <5 | -                 | -       |
| Second dose/positive test (after vaccine) | 20 | 1.11 (0.67, 1.83) | 1 (Ref)           | 10 | 0.83 (0.42, 1.67) | 1 (Ref) | <5 | -                 | -       | 5  | 2.11 (0.85, 5.26) | 1 (Ref) |
| Third dose                                | 5  | 0.52 (0.21, 1.29) | 1 (Ref)           | 0  | -                 | -       | <5 | -                 | -       |    |                   |         |
| <b>Non-white ethnicity</b>                |    |                   |                   |    |                   |         |    |                   |         |    |                   |         |
| First dose/positive test (before vaccine) | 5  | 1.24 (0.45, 3.41) | 1.47 (0.51, 4.23) | 0  | -                 | -       | 0  | -                 | -       | <5 | -                 | -       |
| Second dose/positive test (after vaccine) | <5 | -                 | -                 | 0  | -                 | -       | 0  | -                 | -       | 0  | -                 | -       |
| Third dose                                | 0  | -                 | -                 | 0  | -                 | -       | 0  | -                 | -       |    |                   |         |
| <b>Anaphylaxis</b>                        |    |                   |                   |    |                   |         |    |                   |         |    |                   |         |
| <b>White ethnicity</b>                    |    |                   |                   |    |                   |         |    |                   |         |    |                   |         |
| First dose/positive test (before vaccine) | 28 | 1.11 (0.73, 1.71) | 1 (Ref)           | 11 |                   | 1 (Ref) | <5 | -                 | -       | 6  | 0.97 (0.42, 2.25) | 1 (Ref) |
| Second dose/positive test (after vaccine) | 21 | 0.99 (0.62, 1.59) | 1 (Ref)           | 16 |                   | 1 (Ref) | <5 | -                 | -       | <5 | -                 | -       |
| Third dose                                | 13 | 1.05 (0.56, 1.96) | 1 (Ref)           | 0  | -                 | -       | 5  | 1.06 (0.42, 2.72) | 1 (Ref) |    |                   |         |
| <b>Non-white ethnicity</b>                |    |                   |                   |    |                   |         |    |                   |         |    |                   |         |
| First dose/positive test (before vaccine) | 7  | 0.93 (0.41, 2.13) | 0.98 (0.41, 2.36) | <5 | -                 | -       | 0  | -                 | -       | <5 | -                 | -       |
| Second dose/positive test (after vaccine) | <5 | -                 | -                 | <5 | -                 | -       | <5 | -                 | -       | <5 | -                 | -       |
| Third dose                                | <5 | -                 | -                 | 0  | -                 | -       | 0  | -                 | -       |    |                   |         |

**Supplementary Table 7.** Incidence rate ratios and estimated number of excess events per million in pre-specified weekly periods in the 1-42 days following vaccination or a SARS-CoV-2 positive test (before or after vaccination) compared to baseline period in children aged 5-11 years. Cells with a hyphen are suppressed; N – number of events; IRR – incidence rate ratio; CI – confidence interval.

|                                                       | BNT162b2 vaccine |                   | mRNA-1273 vaccine |              | ChAdOX1 vaccine |              | Positive SARS-CoV-2 test |                      |
|-------------------------------------------------------|------------------|-------------------|-------------------|--------------|-----------------|--------------|--------------------------|----------------------|
|                                                       | N                | IRR (95% CI)      | N                 | IRR (95% CI) | N               | IRR (95% CI) | N                        | IRR (95% CI)         |
| <b>Multisystem inflammatory syndrome</b>              |                  |                   |                   |              |                 |              |                          |                      |
| baseline                                              | 138              | 1.00 (1.00, 1.00) | 0                 | -            | 0               | -            | 163                      | 1.00 (1.00, 1.00)    |
| -28-1 days: first dose/positive test (before vaccine) | 0                | -                 | 0                 | -            | 0               | -            | 21                       | 1.62 (1.02, 2.59)    |
| 0 day: first dose/positive test (before vaccine)      | 0                | -                 | 0                 | -            | 0               | -            | 21                       | 43.95 (27.59, 70.01) |
| 1-7 days: first dose/positive test (before vaccine)   | 0                | -                 | 0                 | -            | 0               | -            | 15                       | 4.46 (2.60, 7.63)    |
| 8-14 days: first dose/positive test (before vaccine)  | 0                | -                 | 0                 | -            | 0               | -            | <5                       | -                    |
| 15-21 days: first dose/positive test (before vaccine) | 0                | -                 | 0                 | -            | 0               | -            | 10                       | 2.99 (1.57, 5.70)    |
| 22-28 days: first dose/positive test (before vaccine) | 0                | -                 | 0                 | -            | 0               | -            | 35                       | 10.59 (7.26, 15.47)  |
| 29-42 days: first dose/positive test (before vaccine) | <5               | -                 | 0                 | -            | 0               | -            | 162                      | 25.27 (19.89, 32.12) |
| -28-1 days: second dose/positive test (after vaccine) | <5               | -                 | 0                 | -            | 0               | -            | 0                        | -                    |
| 0 day: second dose/positive test (after vaccine)      | 0                | -                 | 0                 | -            | 0               | -            | 0                        | -                    |
| 1-7 days: second dose/positive test (after vaccine)   | 0                | -                 | 0                 | -            | 0               | -            | 0                        | -                    |
| 8-14 days: second dose/positive test (after vaccine)  | 0                | -                 | 0                 | -            | 0               | -            | 0                        | -                    |
| 15-21 days: second dose/positive test (after vaccine) | 0                | -                 | 0                 | -            | 0               | -            | 0                        | -                    |
| 22-28 days: second dose/positive test (after vaccine) | 0                | -                 | 0                 | -            | 0               | -            | 0                        | -                    |
| 29-42 days: second dose/positive test (after vaccine) | 0                | -                 | 0                 | -            | 0               | -            | 0                        | -                    |
| <b>Myocarditis</b>                                    |                  |                   |                   |              |                 |              |                          |                      |
| baseline                                              | <5               | -                 | 0                 | -            | 0               | -            | 5                        | 1.00 (1.00, 1.00)    |
| -28-1 days: first dose/positive test (before vaccine) | 0                | -                 | 0                 | -            | 0               | -            | 0                        | -                    |
| 0 day: first dose/positive test (before vaccine)      | 0                | -                 | 0                 | -            | 0               | -            | <5                       | -                    |
| 1-7 days: first dose/positive test (before vaccine)   | 0                | -                 | 0                 | -            | 0               | -            | <5                       | -                    |
| 8-14 days: first dose/positive test (before vaccine)  | 0                | -                 | 0                 | -            | 0               | -            | 0                        | -                    |
| 15-21 days: first dose/positive test (before vaccine) | 0                | -                 | 0                 | -            | 0               | -            | <5                       | -                    |
| 22-28 days: first dose/positive test (before vaccine) | 0                | -                 | 0                 | -            | 0               | -            | <5                       | -                    |
| 29-42 days: first dose/positive test (before vaccine) | 0                | -                 | 0                 | -            | 0               | -            | <5                       | -                    |
| -28-1 days: second dose/positive test (after vaccine) | 0                | -                 | 0                 | -            | 0               | -            | 0                        | -                    |
| 0 day: second dose/positive test (after vaccine)      | 0                | -                 | 0                 | -            | 0               | -            | 0                        | -                    |
| 1-7 days: second dose/positive test (after vaccine)   | 0                | -                 | 0                 | -            | 0               | -            | 0                        | -                    |
| 8-14 days: second dose/positive test (after vaccine)  | 0                | -                 | 0                 | -            | 0               | -            | 0                        | -                    |
| 15-21 days: second dose/positive test (after vaccine) | 0                | -                 | 0                 | -            | 0               | -            | 0                        | -                    |
| 22-28 days: second dose/positive test (after vaccine) | 0                | -                 | 0                 | -            | 0               | -            | 0                        | -                    |
| 29-42 days: second dose/positive test (after vaccine) | 0                | -                 | 0                 | -            | 0               | -            | 0                        | -                    |
| <b>Immune or idiopathic thrombocytopenia</b>          |                  |                   |                   |              |                 |              |                          |                      |
| baseline                                              | 151              | -                 | 0                 | -            | 0               | -            | 360                      | -                    |
| -28-1 days: first dose/positive test (before vaccine) | 5                | -                 | 0                 | -            | 0               | -            | 20                       | -                    |
| 0 day: first dose/positive test (before vaccine)      | 0                | -                 | 0                 | -            | 0               | -            | 15                       | -                    |

|                                                       |     |                   |   |   |   |   |      |                      |
|-------------------------------------------------------|-----|-------------------|---|---|---|---|------|----------------------|
| 1-7 days: first dose/positive test (before vaccine)   | <5  | -                 | 0 | - | 0 | - | 10   | -                    |
| 8-14 days: first dose/positive test (before vaccine)  | 0   | -                 | 0 | - | 0 | - | 7    | -                    |
| 15-21 days: first dose/positive test (before vaccine) | <5  | -                 | 0 | - | 0 | - | 13   | -                    |
| 22-28 days: first dose/positive test (before vaccine) | <5  | -                 | 0 | - | 0 | - | 8    | -                    |
| 29-42 days: first dose/positive test (before vaccine) | <5  | -                 | 0 | - | 0 | - | 23   | -                    |
| -28-1 days: second dose/positive test (after vaccine) | <5  | -                 | 0 | - | 0 | - | <5   | -                    |
| 0 day: second dose/positive test (after vaccine)      | 0   | -                 | 0 | - | 0 | - | 0    | -                    |
| 1-7 days: second dose/positive test (after vaccine)   | 0   | -                 | 0 | - | 0 | - | 0    | -                    |
| 8-14 days: second dose/positive test (after vaccine)  | 0   | -                 | 0 | - | 0 | - | 0    | -                    |
| 15-21 days: second dose/positive test (after vaccine) | 0   | -                 | 0 | - | 0 | - | 0    | -                    |
| 22-28 days: second dose/positive test (after vaccine) | 0   | -                 | 0 | - | 0 | - | 0    | -                    |
| 29-42 days: second dose/positive test (after vaccine) | <5  | -                 | 0 | - | 0 | - | 0    | -                    |
| <b>Epilepsy</b>                                       |     |                   |   |   |   |   |      |                      |
| baseline                                              | 780 | 1.00 (1.00, 1.00) | 0 | - | 0 | - | 1275 | 1.00 (1.00, 1.00)    |
| -28-1 days: first dose/positive test (before vaccine) | 41  | 1.02 (0.73, 1.42) | 0 | - | 0 | - | 66   | 1.12 (0.87, 1.44)    |
| 0 day: first dose/positive test (before vaccine)      | 0   | -                 | 0 | - | 0 | - | 49   | 23.22 (17.33, 31.10) |
| 1-7 days: first dose/positive test (before vaccine)   | 6   | 0.57 (0.25, 1.29) | 0 | - | 0 | - | 17   | 1.16 (0.72, 1.88)    |
| 8-14 days: first dose/positive test (before vaccine)  | 17  | 1.63 (0.99, 2.68) | 0 | - | 0 | - | 18   | 1.23 (0.77, 1.97)    |
| 15-21 days: first dose/positive test (before vaccine) | 12  | 1.17 (0.65, 2.10) | 0 | - | 0 | - | 15   | 1.02 (0.61, 1.70)    |
| 22-28 days: first dose/positive test (before vaccine) | 6   | 0.61 (0.27, 1.37) | 0 | - | 0 | - | 10   | 0.67 (0.36, 1.26)    |
| 29-42 days: first dose/positive test (before vaccine) | 20  | 1.02 (0.64, 1.62) | 0 | - | 0 | - | 40   | 1.34 (0.97, 1.85)    |
| -28-1 days: second dose/positive test (after vaccine) | 6   | 0.32 (0.14, 0.72) | 0 | - | 0 | - | <5   | -                    |
| 0 day: second dose/positive test (after vaccine)      | 0   | -                 | 0 | - | 0 | - | <5   | -                    |
| 1-7 days: second dose/positive test (after vaccine)   | 9   | 1.66 (0.85, 3.25) | 0 | - | 0 | - | <5   | -                    |
| 8-14 days: second dose/positive test (after vaccine)  | 6   | 1.16 (0.51, 2.61) | 0 | - | 0 | - | 0    | -                    |
| 15-21 days: second dose/positive test (after vaccine) | <5  | -                 | 0 | - | 0 | - | 0    | -                    |
| 22-28 days: second dose/positive test (after vaccine) | <5  | -                 | 0 | - | 0 | - | 0    | -                    |
| 29-42 days: second dose/positive test (after vaccine) | 7   | 0.81 (0.38, 1.73) | 0 | - | 0 | - | <5   | -                    |
| <b>Acute pancreatitis</b>                             |     |                   |   |   |   |   |      |                      |
| baseline                                              | 17  | -                 | 0 | - | 0 | - | 38   | -                    |
| -28-1 days: first dose/positive test (before vaccine) | 0   | -                 | 0 | - | 0 | - | <5   | -                    |
| 0 day: first dose/positive test (before vaccine)      | 0   | -                 | 0 | - | 0 | - | <5   | -                    |
| 1-7 days: first dose/positive test (before vaccine)   | 0   | -                 | 0 | - | 0 | - | 5    | -                    |
| 8-14 days: first dose/positive test (before vaccine)  | 0   | -                 | 0 | - | 0 | - | 0    | -                    |
| 15-21 days: first dose/positive test (before vaccine) | 0   | -                 | 0 | - | 0 | - | <5   | -                    |
| 22-28 days: first dose/positive test (before vaccine) | 0   | -                 | 0 | - | 0 | - | <5   | -                    |
| 29-42 days: first dose/positive test (before vaccine) | <5  | -                 | 0 | - | 0 | - | <5   | -                    |
| -28-1 days: second dose/positive test (after vaccine) | 0   | -                 | 0 | - | 0 | - | 0    | -                    |
| 0 day: second dose/positive test (after vaccine)      | 0   | -                 | 0 | - | 0 | - | 0    | -                    |
| 1-7 days: second dose/positive test (after vaccine)   | 0   | -                 | 0 | - | 0 | - | 0    | -                    |
| 8-14 days: second dose/positive test (after vaccine)  | 0   | -                 | 0 | - | 0 | - | 0    | -                    |
| 15-21 days: second dose/positive test (after vaccine) | 0   | -                 | 0 | - | 0 | - | 0    | -                    |
| 22-28 days: second dose/positive test (after vaccine) | 0   | -                 | 0 | - | 0 | - | 0    | -                    |

|                                                       |    |                   |   |   |   |   |    |                        |
|-------------------------------------------------------|----|-------------------|---|---|---|---|----|------------------------|
| 29-42 days: second dose/positive test (after vaccine) | 0  | -                 | 0 | - | 0 | - | <5 | -                      |
| <b>Myositis</b>                                       |    |                   |   |   |   |   |    |                        |
| baseline                                              | 21 | 1.00 (1.00, 1.00) | 0 | - | 0 | - | 51 | 1.00 (1.00, 1.00)      |
| -28-1 days: first dose/positive test (before vaccine) | <5 | -                 | 0 | - | 0 | - | <5 | -                      |
| 0 day: first dose/positive test (before vaccine)      | 0  | -                 | 0 | - | 0 | - | 6  | 103.73 (39.97, 269.22) |
| 1-7 days: first dose/positive test (before vaccine)   | 0  | -                 | 0 | - | 0 | - | 8  | 21.06 (8.88, 49.98)    |
| 8-14 days: first dose/positive test (before vaccine)  | 0  | -                 | 0 | - | 0 | - | <5 | -                      |
| 15-21 days: first dose/positive test (before vaccine) | <5 | -                 | 0 | - | 0 | - | <5 | -                      |
| 22-28 days: first dose/positive test (before vaccine) | 0  | -                 | 0 | - | 0 | - | 0  | -                      |
| 29-42 days: first dose/positive test (before vaccine) | 0  | -                 | 0 | - | 0 | - | 0  | -                      |
| -28-1 days: second dose/positive test (after vaccine) | 0  | -                 | 0 | - | 0 | - | 0  | -                      |
| 0 day: second dose/positive test (after vaccine)      | 0  | -                 | 0 | - | 0 | - | 0  | -                      |
| 1-7 days: second dose/positive test (after vaccine)   | 0  | -                 | 0 | - | 0 | - | 0  | -                      |
| 8-14 days: second dose/positive test (after vaccine)  | 0  | -                 | 0 | - | 0 | - | 0  | -                      |
| 15-21 days: second dose/positive test (after vaccine) | 0  | -                 | 0 | - | 0 | - | 0  | -                      |
| 22-28 days: second dose/positive test (after vaccine) | 0  | -                 | 0 | - | 0 | - | 0  | -                      |
| 29-42 days: second dose/positive test (after vaccine) | 0  | -                 | 0 | - | 0 | - | 0  | -                      |
| <b>Acute disseminated encephalomyelitis</b>           |    |                   |   |   |   |   |    |                        |
| baseline                                              | 27 | 1.00 (1.00, 1.00) | 0 | - | 0 | - | 61 | 1.00 (1.00, 1.00)      |
| -28-1 days: first dose/positive test (before vaccine) | 0  | -                 | 0 | - | 0 | - | <5 | -                      |
| 0 day: first dose/positive test (before vaccine)      | 0  | -                 | 0 | - | 0 | - | 6  | 54.23 (22.21, 132.40)  |
| 1-7 days: first dose/positive test (before vaccine)   | 0  | -                 | 0 | - | 0 | - | <5 | -                      |
| 8-14 days: first dose/positive test (before vaccine)  | <5 | -                 | 0 | - | 0 | - | <5 | -                      |
| 15-21 days: first dose/positive test (before vaccine) | 0  | -                 | 0 | - | 0 | - | <5 | -                      |
| 22-28 days: first dose/positive test (before vaccine) | 0  | -                 | 0 | - | 0 | - | <5 | -                      |
| 29-42 days: first dose/positive test (before vaccine) | 0  | -                 | 0 | - | 0 | - | <5 | -                      |
| -28-1 days: second dose/positive test (after vaccine) | 0  | -                 | 0 | - | 0 | - | 0  | -                      |
| 0 day: second dose/positive test (after vaccine)      | 0  | -                 | 0 | - | 0 | - | 0  | -                      |
| 1-7 days: second dose/positive test (after vaccine)   | 0  | -                 | 0 | - | 0 | - | 0  | -                      |
| 8-14 days: second dose/positive test (after vaccine)  | 0  | -                 | 0 | - | 0 | - | 0  | -                      |
| 15-21 days: second dose/positive test (after vaccine) | 0  | -                 | 0 | - | 0 | - | 0  | -                      |
| 22-28 days: second dose/positive test (after vaccine) | 0  | -                 | 0 | - | 0 | - | 0  | -                      |
| 29-42 days: second dose/positive test (after vaccine) | 0  | -                 | 0 | - | 0 | - | 0  | -                      |
| <b>Demyelinating disease</b>                          |    |                   |   |   |   |   |    |                        |
| baseline                                              | 16 | 1.00 (1.00, 1.00) | 0 | - | 0 | - | 46 | 1.00 (1.00, 1.00)      |
| -28-1 days: first dose/positive test (before vaccine) | <5 | -                 | 0 | - | 0 | - | <5 | -                      |
| 0 day: first dose/positive test (before vaccine)      | 0  | -                 | 0 | - | 0 | - | 0  | -                      |
| 1-7 days: first dose/positive test (before vaccine)   | 0  | -                 | 0 | - | 0 | - | 0  | -                      |
| 8-14 days: first dose/positive test (before vaccine)  | <5 | -                 | 0 | - | 0 | - | 0  | -                      |
| 15-21 days: first dose/positive test (before vaccine) | 0  | -                 | 0 | - | 0 | - | <5 | -                      |
| 22-28 days: first dose/positive test (before vaccine) | 0  | -                 | 0 | - | 0 | - | <5 | -                      |
| 29-42 days: first dose/positive test (before vaccine) | <5 | -                 | 0 | - | 0 | - | <5 | -                      |
| -28-1 days: second dose/positive test (after vaccine) | <5 | -                 | 0 | - | 0 | - | 0  | -                      |

|                                                       |     |                   |   |   |   |   |      |                      |
|-------------------------------------------------------|-----|-------------------|---|---|---|---|------|----------------------|
| 0 day: second dose/positive test (after vaccine)      | 0   | -                 | 0 | - | 0 | - | 0    | -                    |
| 1-7 days: second dose/positive test (after vaccine)   | 0   | -                 | 0 | - | 0 | - | 0    | -                    |
| 8-14 days: second dose/positive test (after vaccine)  | <5  | -                 | 0 | - | 0 | - | 0    | -                    |
| 15-21 days: second dose/positive test (after vaccine) | 0   | -                 | 0 | - | 0 | - | 0    | -                    |
| 22-28 days: second dose/positive test (after vaccine) | 0   | -                 | 0 | - | 0 | - | 0    | -                    |
| 29-42 days: second dose/positive test (after vaccine) | 0   | -                 | 0 | - | 0 | - | 0    | -                    |
| <b>Appendicitis</b>                                   |     |                   |   |   |   |   |      |                      |
| baseline                                              | 823 | 1.00 (1.00, 1.00) | 0 | - | 0 | - | 2346 | 1.00 (1.00, 1.00)    |
| -28-1 days: first dose/positive test (before vaccine) | 30  | 0.70 (0.48, 1.02) | 0 | - | 0 | - | 91   | 0.74 (0.60, 0.92)    |
| 0 day: first dose/positive test (before vaccine)      | 0   | -                 | 0 | - | 0 | - | 119  | 26.72 (22.07, 32.34) |
| 1-7 days: first dose/positive test (before vaccine)   | 11  | 1.03 (0.56, 1.88) | 0 | - | 0 | - | 40   | 1.29 (0.94, 1.78)    |
| 8-14 days: first dose/positive test (before vaccine)  | 15  | 1.37 (0.81, 2.31) | 0 | - | 0 | - | 36   | 1.18 (0.84, 1.64)    |
| 15-21 days: first dose/positive test (before vaccine) | 10  | 0.93 (0.49, 1.75) | 0 | - | 0 | - | 30   | 0.99 (0.69, 1.42)    |
| 22-28 days: first dose/positive test (before vaccine) | 9   | 0.88 (0.45, 1.71) | 0 | - | 0 | - | 30   | 0.98 (0.68, 1.41)    |
| 29-42 days: first dose/positive test (before vaccine) | 18  | 0.95 (0.59, 1.54) | 0 | - | 0 | - | 77   | 1.22 (0.96, 1.54)    |
| -28-1 days: second dose/positive test (after vaccine) | 11  | 0.70 (0.38, 1.29) | 0 | - | 0 | - | <5   | -                    |
| 0 day: second dose/positive test (after vaccine)      | 0   | -                 | 0 | - | 0 | - | 0    | -                    |
| 1-7 days: second dose/positive test (after vaccine)   | <5  | -                 | 0 | - | 0 | - | 0    | -                    |
| 8-14 days: second dose/positive test (after vaccine)  | 0   | -                 | 0 | - | 0 | - | <5   | -                    |
| 15-21 days: second dose/positive test (after vaccine) | <5  | -                 | 0 | - | 0 | - | 0    | -                    |
| 22-28 days: second dose/positive test (after vaccine) | 0   | -                 | 0 | - | 0 | - | 0    | -                    |
| 29-42 days: second dose/positive test (after vaccine) | <5  | -                 | 0 | - | 0 | - | 0    | -                    |
| <b>Guillain-Barre Syndrome</b>                        |     |                   |   |   |   |   |      |                      |
| baseline                                              | <5  | -                 | 0 | - | 0 | - | 15   | -                    |
| -28-1 days: first dose/positive test (before vaccine) | 0   | -                 | 0 | - | 0 | - | 0    | -                    |
| 0 day: first dose/positive test (before vaccine)      | 0   | -                 | 0 | - | 0 | - | <5   | -                    |
| 1-7 days: first dose/positive test (before vaccine)   | 0   | -                 | 0 | - | 0 | - | 0    | -                    |
| 8-14 days: first dose/positive test (before vaccine)  | 0   | -                 | 0 | - | 0 | - | 0    | -                    |
| 15-21 days: first dose/positive test (before vaccine) | 0   | -                 | 0 | - | 0 | - | 0    | -                    |
| 22-28 days: first dose/positive test (before vaccine) | 0   | -                 | 0 | - | 0 | - | 0    | -                    |
| 29-42 days: first dose/positive test (before vaccine) | 0   | -                 | 0 | - | 0 | - | 0    | -                    |
| -28-1 days: second dose/positive test (after vaccine) | 0   | -                 | 0 | - | 0 | - | 0    | -                    |
| 0 day: second dose/positive test (after vaccine)      | 0   | -                 | 0 | - | 0 | - | 0    | -                    |
| 1-7 days: second dose/positive test (after vaccine)   | 0   | -                 | 0 | - | 0 | - | 0    | -                    |
| 8-14 days: second dose/positive test (after vaccine)  | 0   | -                 | 0 | - | 0 | - | 0    | -                    |
| 15-21 days: second dose/positive test (after vaccine) | 0   | -                 | 0 | - | 0 | - | 0    | -                    |
| 22-28 days: second dose/positive test (after vaccine) | 0   | -                 | 0 | - | 0 | - | 0    | -                    |
| 29-42 days: second dose/positive test (after vaccine) | 0   | -                 | 0 | - | 0 | - | 0    | -                    |
| <b>Angioedema</b>                                     |     |                   |   |   |   |   |      |                      |
| baseline                                              | 54  | -                 | 0 | - | 0 | - | 173  | -                    |
| -28-1 days: first dose/positive test (before vaccine) | <5  | -                 | 0 | - | 0 | - | 13   | -                    |
| 0 day: first dose/positive test (before vaccine)      | 0   | -                 | 0 | - | 0 | - | <5   | -                    |
| 1-7 days: first dose/positive test (before vaccine)   | 0   | -                 | 0 | - | 0 | - | <5   | -                    |



|                                                       |    |                   |   |   |   |   |     |                   |
|-------------------------------------------------------|----|-------------------|---|---|---|---|-----|-------------------|
| 8-14 days: first dose/positive test (before vaccine)  | <5 | -                 | 0 | - | 0 | - | <5  | -                 |
| 15-21 days: first dose/positive test (before vaccine) | 0  | -                 | 0 | - | 0 | - | <5  | -                 |
| 22-28 days: first dose/positive test (before vaccine) | <5 | -                 | 0 | - | 0 | - | 0   | -                 |
| 29-42 days: first dose/positive test (before vaccine) | <5 | -                 | 0 | - | 0 | - | <5  | -                 |
| -28-1 days: second dose/positive test (after vaccine) | 0  | -                 | 0 | - | 0 | - | 0   | -                 |
| 0 day: second dose/positive test (after vaccine)      | 0  | -                 | 0 | - | 0 | - | 0   | -                 |
| 1-7 days: second dose/positive test (after vaccine)   | 0  | -                 | 0 | - | 0 | - | 0   | -                 |
| 8-14 days: second dose/positive test (after vaccine)  | 0  | -                 | 0 | - | 0 | - | 0   | -                 |
| 15-21 days: second dose/positive test (after vaccine) | 0  | -                 | 0 | - | 0 | - | 0   | -                 |
| 22-28 days: second dose/positive test (after vaccine) | 0  | -                 | 0 | - | 0 | - | 0   | -                 |
| 29-42 days: second dose/positive test (after vaccine) | 0  | -                 | 0 | - | 0 | - | 0   | -                 |
| <b>Anaphylaxis</b>                                    |    |                   |   |   |   |   |     |                   |
| baseline                                              | 70 | 1.00 (1.00, 1.00) | 0 | - | 0 | - | 208 | 1.00 (1.00, 1.00) |
| -28-1 days: first dose/positive test (before vaccine) | <5 | -                 | 0 | - | 0 | - | 8   | 0.74 (0.36, 1.55) |
| 0 day: first dose/positive test (before vaccine)      | 0  | -                 | 0 | - | 0 | - | <5  | -                 |
| 1-7 days: first dose/positive test (before vaccine)   | <5 | -                 | 0 | - | 0 | - | <5  | -                 |
| 8-14 days: first dose/positive test (before vaccine)  | 0  | -                 | 0 | - | 0 | - | <5  | -                 |
| 15-21 days: first dose/positive test (before vaccine) | 0  | -                 | 0 | - | 0 | - | 5   | 1.80 (0.72, 4.48) |
| 22-28 days: first dose/positive test (before vaccine) | 0  | -                 | 0 | - | 0 | - | <5  | -                 |
| 29-42 days: first dose/positive test (before vaccine) | <5 | -                 | 0 | - | 0 | - | 10  | 1.80 (0.93, 3.51) |
| -28-1 days: second dose/positive test (after vaccine) | <5 | -                 | 0 | - | 0 | - | 0   | -                 |
| 0 day: second dose/positive test (after vaccine)      | 0  | -                 | 0 | - | 0 | - | 0   | -                 |
| 1-7 days: second dose/positive test (after vaccine)   | 0  | -                 | 0 | - | 0 | - | 0   | -                 |
| 8-14 days: second dose/positive test (after vaccine)  | 0  | -                 | 0 | - | 0 | - | 0   | -                 |
| 15-21 days: second dose/positive test (after vaccine) | 0  | -                 | 0 | - | 0 | - | 0   | -                 |
| 22-28 days: second dose/positive test (after vaccine) | 0  | -                 | 0 | - | 0 | - | 0   | -                 |
| 29-42 days: second dose/positive test (after vaccine) | 0  | -                 | 0 | - | 0 | - | 0   | -                 |

**Supplementary Table 8.** Incidence rate ratios and estimated number of excess events per million in pre-specified weekly periods in the 1-42 days following vaccination or a SARS-CoV-2 positive test (before or after vaccination) compared to baseline period in adolescents aged 12-17 years. N – number of events; IRR – incidence rate ratio; CI – confidence interval

|                                                       | BNT162b2 vaccine |                    | mRNA-1273 vaccine |                   | ChAdOX1 vaccine |              | Positive SARS-CoV-2 test |                        |
|-------------------------------------------------------|------------------|--------------------|-------------------|-------------------|-----------------|--------------|--------------------------|------------------------|
|                                                       | N                | IRR (95% CI)       | N                 | IRR (95% CI)      | N               | IRR (95% CI) | N                        | IRR (95% CI)           |
| <b>Multisystem inflammatory syndrome</b>              |                  |                    |                   |                   |                 |              |                          |                        |
| baseline                                              | 208              | 1.00 (1.00, 1.00)  | 0                 | -                 | <5              | -            | 78                       | 1.00 (1.00, 1.00)      |
| -28-1 days: first dose/positive test (before vaccine) | 5                | 0.36 (0.14, 0.91)  | 0                 | -                 | 0               | -            | 15                       | 2.92 (1.64, 5.19)      |
| 0 day: first dose/positive test (before vaccine)      | 0                | -                  | 0                 | -                 | 0               | -            | 22                       | 114.10 (69.29, 187.91) |
| 1-7 days: first dose/positive test (before vaccine)   | <5               | -                  | 0                 | -                 | 0               | -            | 9                        | 6.75 (3.33, 13.69)     |
| 8-14 days: first dose/positive test (before vaccine)  | <5               | -                  | 0                 | -                 | 0               | -            | <5                       | -                      |
| 15-21 days: first dose/positive test (before vaccine) | <5               | -                  | 0                 | -                 | 0               | -            | 5                        | 3.79 (1.51, 9.51)      |
| 22-28 days: first dose/positive test (before vaccine) | <5               | -                  | 0                 | -                 | 0               | -            | 13                       | 10.03 (5.45, 18.46)    |
| 29-42 days: first dose/positive test (before vaccine) | 10               | 1.03 (0.49, 2.18)  | 0                 | -                 | 0               | -            | 67                       | 25.49 (17.70, 36.72)   |
| -28-1 days: second dose/positive test (after vaccine) | <5               | -                  | 0                 | -                 | 0               | -            | <5                       | -                      |
| 0 day: second dose/positive test (after vaccine)      | 0                | -                  | 0                 | -                 | 0               | -            | 0                        | -                      |
| 1-7 days: second dose/positive test (after vaccine)   | <5               | -                  | 0                 | -                 | 0               | -            | <5                       | -                      |
| 8-14 days: second dose/positive test (after vaccine)  | 0                | -                  | 0                 | -                 | 0               | -            | 0                        | -                      |
| 15-21 days: second dose/positive test (after vaccine) | <5               | -                  | 0                 | -                 | 0               | -            | 0                        | -                      |
| 22-28 days: second dose/positive test (after vaccine) | 0                | -                  | 0                 | -                 | 0               | -            | 6                        | 38.15 (11.80, 123.29)  |
| 29-42 days: second dose/positive test (after vaccine) | 0                | -                  | 0                 | -                 | 0               | -            | 7                        | 23.08 (7.60, 70.12)    |
| -28-1 days: third dose                                | <5               | -                  | 0                 | -                 | 0               | -            |                          |                        |
| 0 day: third dose                                     | 0                | -                  | 0                 | -                 | 0               | -            |                          |                        |
| 1-7 days: third dose                                  | 0                | -                  | 0                 | -                 | 0               | -            |                          |                        |
| 8-14 days: third dose                                 | 0                | -                  | 0                 | -                 | 0               | -            |                          |                        |
| 15-21 days: third dose                                | 0                | -                  | 0                 | -                 | 0               | -            |                          |                        |
| 22-28 days: third dose                                | 0                | -                  | 0                 | -                 | 0               | -            |                          |                        |
| 29-42 days: third dose                                | <5               | -                  | 0                 | -                 | 0               | -            |                          |                        |
| <b>Myocarditis</b>                                    |                  |                    |                   |                   |                 |              |                          |                        |
| baseline                                              | 82               | 1.00 (1.00, 1.00)  | 5                 | 1.00 (1.00, 1.00) | <5              | -            | 62                       | 1.00 (1.00, 1.00)      |
| -28-1 days: first dose/positive test (before vaccine) | <5               | -                  | 0                 | -                 | 0               | -            | <5                       | -                      |
| 0 day: first dose/positive test (before vaccine)      | 0                | -                  | 0                 | -                 | 0               | -            | <5                       | -                      |
| 1-7 days: first dose/positive test (before vaccine)   | 6                | 4.11 (1.68, 10.08) | 0                 | -                 | <5              | -            | 0                        | -                      |
| 8-14 days: first dose/positive test (before vaccine)  | 6                | 4.33 (1.77, 10.58) | 0                 | -                 | 0               | -            | 0                        | -                      |
| 15-21 days: first dose/positive test (before vaccine) | <5               | -                  | 0                 | -                 | 0               | -            | <5                       | -                      |
| 22-28 days: first dose/positive test (before vaccine) | <5               | -                  | 0                 | -                 | 0               | -            | <5                       | -                      |
| 29-42 days: first dose/positive test (before vaccine) | <5               | -                  | 0                 | -                 | 0               | -            | 5                        | 6.25 (2.30, 17.00)     |
| -28-1 days: second dose/positive test (after vaccine) | <5               | -                  | 0                 | -                 | 0               | -            | <5                       | -                      |
| 0 day: second dose/positive test (after vaccine)      | 0                | -                  | 0                 | -                 | 0               | -            | 0                        | -                      |
| 1-7 days: second dose/positive test (after vaccine)   | 8                | 8.65 (3.97, 18.87) | 0                 | -                 | 0               | -            | <5                       | -                      |
| 8-14 days: second dose/positive test (after vaccine)  | <5               | -                  | 0                 | -                 | 0               | -            | <5                       | -                      |

|                                                       |      |                   |    |                   |    |                   |      |                      |
|-------------------------------------------------------|------|-------------------|----|-------------------|----|-------------------|------|----------------------|
| 15-21 days: second dose/positive test (after vaccine) | <5   | -                 | 0  | -                 | 0  | -                 | 0    | -                    |
| 22-28 days: second dose/positive test (after vaccine) | <5   | -                 | 0  | -                 | 0  | -                 | <5   | -                    |
| 29-42 days: second dose/positive test (after vaccine) | <5   | -                 | 0  | -                 | 0  | -                 | <5   | -                    |
| -28-1 days: third dose                                | <5   | -                 | 0  | -                 | 0  | -                 |      |                      |
| 0 day: third dose                                     | 0    | -                 | 0  | -                 | 0  | -                 |      |                      |
| 1-7 days: third dose                                  | 0    | -                 | <5 | -                 | 0  | -                 |      |                      |
| 8-14 days: third dose                                 | <5   | -                 | <5 | -                 | 0  | -                 |      |                      |
| 15-21 days: third dose                                | 0    | -                 | 0  | -                 | 0  | -                 |      |                      |
| 22-28 days: third dose                                | 0    | -                 | 0  | -                 | 0  | -                 |      |                      |
| 29-42 days: third dose                                | 0    | -                 | 0  | -                 | 0  | -                 |      |                      |
| <b>Immune or idiopathic thrombocytopenia</b>          |      |                   |    |                   |    |                   |      |                      |
| baseline                                              | 568  | 1.00 (1.00, 1.00) | 16 | 1.00 (1.00, 1.00) | 17 | 1.00 (1.00, 1.00) | 399  | 1.00 (1.00, 1.00)    |
| -28-1 days: first dose/positive test (before vaccine) | 19   | 0.50 (0.31, 0.79) | 0  | -                 | 0  | -                 | 24   | 1.77 (1.15, 2.70)    |
| 0 day: first dose/positive test (before vaccine)      | <5   | -                 | 0  | -                 | 0  | -                 | 15   | 29.89 (17.66, 50.58) |
| 1-7 days: first dose/positive test (before vaccine)   | <5   | -                 | 0  | -                 | 0  | -                 | 10   | 2.86 (1.52, 5.41)    |
| 8-14 days: first dose/positive test (before vaccine)  | 7    | 0.77 (0.36, 1.63) | 0  | -                 | 0  | -                 | <5   | -                    |
| 15-21 days: first dose/positive test (before vaccine) | 13   | 1.44 (0.83, 2.53) | 0  | -                 | 0  | -                 | <5   | -                    |
| 22-28 days: first dose/positive test (before vaccine) | 5    | 0.56 (0.23, 1.36) | 0  | -                 | <5 | -                 | <5   | -                    |
| 29-42 days: first dose/positive test (before vaccine) | 12   | 0.69 (0.38, 1.23) | 0  | -                 | 0  | -                 | 19   | 2.80 (1.75, 4.49)    |
| -28-1 days: second dose/positive test (after vaccine) | 15   | 0.67 (0.40, 1.13) | 0  | -                 | 0  | -                 | 8    | 1.16 (0.57, 2.39)    |
| 0 day: second dose/positive test (after vaccine)      | <5   | -                 | 0  | -                 | 0  | -                 | <5   | -                    |
| 1-7 days: second dose/positive test (after vaccine)   | 7    | 1.11 (0.52, 2.36) | 0  | -                 | 0  | -                 | <5   | -                    |
| 8-14 days: second dose/positive test (after vaccine)  | <5   | -                 | 0  | -                 | <5 | -                 | <5   | -                    |
| 15-21 days: second dose/positive test (after vaccine) | <5   | -                 | 0  | -                 | 0  | -                 | 5    | 2.85 (1.16, 7.00)    |
| 22-28 days: second dose/positive test (after vaccine) | <5   | -                 | 0  | -                 | 0  | -                 | <5   | -                    |
| 29-42 days: second dose/positive test (after vaccine) | 14   | 1.17 (0.68, 2.02) | 0  | -                 | 0  | -                 | 6    | 1.71 (0.75, 3.90)    |
| -28-1 days: third dose                                | 6    | 0.59 (0.26, 1.34) | 0  | -                 | 0  | -                 |      |                      |
| 0 day: third dose                                     | 0    | -                 | 0  | -                 | 0  | -                 |      |                      |
| 1-7 days: third dose                                  | <5   | -                 | 0  | -                 | 0  | -                 |      |                      |
| 8-14 days: third dose                                 | <5   | -                 | 0  | -                 | 0  | -                 |      |                      |
| 15-21 days: third dose                                | <5   | -                 | 0  | -                 | 0  | -                 |      |                      |
| 22-28 days: third dose                                | <5   | -                 | 0  | -                 | 0  | -                 |      |                      |
| 29-42 days: third dose                                | <5   | -                 | <5 | -                 | 0  | -                 |      |                      |
| <b>Epilepsy</b>                                       |      |                   |    |                   |    |                   |      |                      |
| baseline                                              | 2338 | 1.00 (1.00, 1.00) | 90 | 1.00 (1.00, 1.00) | 74 | 1.00 (1.00, 1.00) | 1375 | 1.00 (1.00, 1.00)    |
| -28-1 days: first dose/positive test (before vaccine) | 128  | 0.94 (0.78, 1.13) | 0  | -                 | <5 | -                 | 32   | 0.80 (0.56, 1.14)    |
| 0 day: first dose/positive test (before vaccine)      | <5   | -                 | 0  | -                 | 0  | -                 | 36   | 25.18 (17.99, 35.23) |
| 1-7 days: first dose/positive test (before vaccine)   | 36   | 1.05 (0.75, 1.46) | 0  | -                 | <5 | -                 | 22   | 2.21 (1.44, 3.38)    |
| 8-14 days: first dose/positive test (before vaccine)  | 36   | 1.04 (0.75, 1.45) | 0  | -                 | <5 | -                 | 8    | 0.81 (0.40, 1.63)    |
| 15-21 days: first dose/positive test (before vaccine) | 44   | 1.23 (0.91, 1.67) | 0  | -                 | 5  | 3.70 (1.48, 9.22) | 13   | 1.31 (0.76, 2.27)    |
| 22-28 days: first dose/positive test (before vaccine) | 34   | 0.96 (0.68, 1.35) | 0  | -                 | <5 | -                 | 12   | 1.20 (0.68, 2.12)    |
| 29-42 days: first dose/positive test (before vaccine) | 65   | 0.93 (0.72, 1.20) | 0  | -                 | <5 | -                 | 22   | 1.11 (0.72, 1.69)    |
| -28-1 days: second dose/positive test (after vaccine) | 69   | 0.75 (0.59, 0.96) | <5 | -                 | <5 | -                 | 27   | 0.97 (0.66, 1.43)    |

|                                                       |     |                   |    |                   |    |                   |     |                    |
|-------------------------------------------------------|-----|-------------------|----|-------------------|----|-------------------|-----|--------------------|
| 0 day: second dose/positive test (after vaccine)      | <5  | -                 | 0  | -                 | <5 | -                 | 7   | 6.96 (3.29, 14.71) |
| 1-7 days: second dose/positive test (after vaccine)   | 32  | 1.15 (0.81, 1.64) | 0  | -                 | <5 | -                 | 13  | 1.86 (1.07, 3.23)  |
| 8-14 days: second dose/positive test (after vaccine)  | 27  | 0.97 (0.66, 1.42) | 0  | -                 | 0  | -                 | 9   | 1.28 (0.66, 2.49)  |
| 15-21 days: second dose/positive test (after vaccine) | 35  | 1.27 (0.91, 1.78) | 0  | -                 | <5 | -                 | 7   | 1.00 (0.47, 2.12)  |
| 22-28 days: second dose/positive test (after vaccine) | 32  | 1.18 (0.83, 1.67) | 0  | -                 | 0  | -                 | 7   | 1.01 (0.48, 2.14)  |
| 29-42 days: second dose/positive test (after vaccine) | 64  | 1.20 (0.93, 1.54) | <5 | -                 | 5  | 1.96 (0.78, 4.88) | 18  | 1.32 (0.82, 2.11)  |
| -28-1 days: third dose                                | 38  | 0.89 (0.64, 1.24) | <5 | -                 | 0  | -                 |     |                    |
| 0 day: third dose                                     | 0   | -                 | 0  | -                 | 0  | -                 |     |                    |
| 1-7 days: third dose                                  | 10  | 0.98 (0.53, 1.84) | 0  | -                 | 0  | -                 |     |                    |
| 8-14 days: third dose                                 | 5   | 0.51 (0.21, 1.24) | <5 | -                 | 0  | -                 |     |                    |
| 15-21 days: third dose                                | 8   | 0.85 (0.42, 1.71) | <5 | -                 | 0  | -                 |     |                    |
| 22-28 days: third dose                                | 12  | 1.28 (0.72, 2.28) | <5 | -                 | 0  | -                 |     |                    |
| 29-42 days: third dose                                | 13  | 0.70 (0.40, 1.21) | <5 | -                 | 0  | -                 |     |                    |
| <b>Acute pancreatitis</b>                             |     |                   |    |                   |    |                   |     |                    |
| baseline                                              | 207 | 1.00 (1.00, 1.00) | 5  | 1.00 (1.00, 1.00) | <5 | -                 | 140 | 1.00 (1.00, 1.00)  |
| -28-1 days: first dose/positive test (before vaccine) | 5   | 0.35 (0.14, 0.87) | 0  | -                 | 0  | -                 | 6   | 1.43 (0.62, 3.33)  |
| 0 day: first dose/positive test (before vaccine)      | 0   | -                 | 0  | -                 | 0  | -                 | <5  | -                  |
| 1-7 days: first dose/positive test (before vaccine)   | 8   | 2.21 (1.07, 4.55) | 0  | -                 | 0  | -                 | 0   | -                  |
| 8-14 days: first dose/positive test (before vaccine)  | <5  | -                 | 0  | -                 | 0  | -                 | <5  | -                  |
| 15-21 days: first dose/positive test (before vaccine) | <5  | -                 | 0  | -                 | 0  | -                 | <5  | -                  |
| 22-28 days: first dose/positive test (before vaccine) | 7   | 2.05 (0.95, 4.45) | 0  | -                 | <5 | -                 | 0   | -                  |
| 29-42 days: first dose/positive test (before vaccine) | 6   | 0.81 (0.35, 1.87) | 0  | -                 | 0  | -                 | <5  | -                  |
| -28-1 days: second dose/positive test (after vaccine) | 6   | 0.63 (0.27, 1.44) | 0  | -                 | 0  | -                 | <5  | -                  |
| 0 day: second dose/positive test (after vaccine)      | 0   | -                 | 0  | -                 | 0  | -                 | <5  | -                  |
| 1-7 days: second dose/positive test (after vaccine)   | <5  | -                 | 0  | -                 | 0  | -                 | <5  | -                  |
| 8-14 days: second dose/positive test (after vaccine)  | 0   | -                 | 0  | -                 | 0  | -                 | 0   | -                  |
| 15-21 days: second dose/positive test (after vaccine) | <5  | -                 | 0  | -                 | 0  | -                 | 0   | -                  |
| 22-28 days: second dose/positive test (after vaccine) | <5  | -                 | 0  | -                 | 0  | -                 | <5  | -                  |
| 29-42 days: second dose/positive test (after vaccine) | <5  | -                 | 0  | -                 | 0  | -                 | 0   | -                  |
| -28-1 days: third dose                                | <5  | -                 | 0  | -                 | 0  | -                 |     |                    |
| 0 day: third dose                                     | 0   | -                 | 0  | -                 | 0  | -                 |     |                    |
| 1-7 days: third dose                                  | 0   | -                 | 0  | -                 | 0  | -                 |     |                    |
| 8-14 days: third dose                                 | <5  | -                 | 0  | -                 | 0  | -                 |     |                    |
| 15-21 days: third dose                                | <5  | -                 | 0  | -                 | 0  | -                 |     |                    |
| 22-28 days: third dose                                | <5  | -                 | 0  | -                 | 0  | -                 |     |                    |
| 29-42 days: third dose                                | <5  | -                 | 0  | -                 | 0  | -                 |     |                    |
| <b>Myositis</b>                                       |     |                   |    |                   |    |                   |     |                    |
| baseline                                              | 71  | 1.00 (1.00, 1.00) | 0  | -                 | 0  | -                 | 48  | 1.00 (1.00, 1.00)  |
| -28-1 days: first dose/positive test (before vaccine) | <5  | -                 | 0  | -                 | 0  | -                 | <5  | -                  |
| 0 day: first dose/positive test (before vaccine)      | 0   | -                 | 0  | -                 | 0  | -                 | <5  | -                  |
| 1-7 days: first dose/positive test (before vaccine)   | <5  | -                 | 0  | -                 | 0  | -                 | <5  | -                  |
| 8-14 days: first dose/positive test (before vaccine)  | <5  | -                 | 0  | -                 | 0  | -                 | 0   | -                  |
| 15-21 days: first dose/positive test (before vaccine) | <5  | -                 | 0  | -                 | 0  | -                 | 0   | -                  |

|                                                       |     |                   |    |                   |    |   |    |                       |
|-------------------------------------------------------|-----|-------------------|----|-------------------|----|---|----|-----------------------|
| 22-28 days: first dose/positive test (before vaccine) | <5  | -                 | 0  | -                 | 0  | - | 0  | -                     |
| 29-42 days: first dose/positive test (before vaccine) | <5  | -                 | 0  | -                 | 0  | - | 0  | -                     |
| -28-1 days: second dose/positive test (after vaccine) | <5  | -                 | 0  | -                 | 0  | - | <5 | -                     |
| 0 day: second dose/positive test (after vaccine)      | 0   | -                 | 0  | -                 | 0  | - | 0  | -                     |
| 1-7 days: second dose/positive test (after vaccine)   | <5  | -                 | 0  | -                 | 0  | - | 0  | -                     |
| 8-14 days: second dose/positive test (after vaccine)  | 0   | -                 | 0  | -                 | 0  | - | 0  | -                     |
| 15-21 days: second dose/positive test (after vaccine) | 0   | -                 | 0  | -                 | 0  | - | 0  | -                     |
| 22-28 days: second dose/positive test (after vaccine) | 0   | -                 | 0  | -                 | 0  | - | 0  | -                     |
| 29-42 days: second dose/positive test (after vaccine) | <5  | -                 | 0  | -                 | <5 | - | 0  | -                     |
| -28-1 days: third dose                                | <5  | -                 | 0  | -                 | 0  | - |    |                       |
| 0 day: third dose                                     | 0   | -                 | 0  | -                 | 0  | - |    |                       |
| 1-7 days: third dose                                  | <5  | -                 | 0  | -                 | 0  | - |    |                       |
| 8-14 days: third dose                                 | 0   | -                 | 0  | -                 | 0  | - |    |                       |
| 15-21 days: third dose                                | 0   | -                 | 0  | -                 | 0  | - |    |                       |
| 22-28 days: third dose                                | 0   | -                 | 0  | -                 | 0  | - |    |                       |
| 29-42 days: third dose                                | 0   | -                 | 0  | -                 | 0  | - |    |                       |
| <b>Acute disseminated encephalomyelitis</b>           |     |                   |    |                   |    |   |    |                       |
| baseline                                              | 94  | 1.00 (1.00, 1.00) | <5 | -                 | 0  | - | 74 | 1.00 (1.00, 1.00)     |
| -28-1 days: first dose/positive test (before vaccine) | 5   | 0.89 (0.35, 2.26) | 0  | -                 | 0  | - | 9  | 3.11 (1.51, 6.40)     |
| 0 day: first dose/positive test (before vaccine)      | 0   | -                 | 0  | -                 | 0  | - | 5  | 46.95 (18.45, 119.50) |
| 1-7 days: first dose/positive test (before vaccine)   | 0   | -                 | 0  | -                 | 0  | - | <5 | -                     |
| 8-14 days: first dose/positive test (before vaccine)  | <5  | -                 | 0  | -                 | 0  | - | <5 | -                     |
| 15-21 days: first dose/positive test (before vaccine) | <5  | -                 | 0  | -                 | 0  | - | 0  | -                     |
| 22-28 days: first dose/positive test (before vaccine) | <5  | -                 | 0  | -                 | 0  | - | <5 | -                     |
| 29-42 days: first dose/positive test (before vaccine) | <5  | -                 | 0  | -                 | 0  | - | <5 | -                     |
| -28-1 days: second dose/positive test (after vaccine) | 5   | 1.44 (0.56, 3.74) | 0  | -                 | 0  | - | 0  | -                     |
| 0 day: second dose/positive test (after vaccine)      | 0   | -                 | 0  | -                 | 0  | - | <5 | -                     |
| 1-7 days: second dose/positive test (after vaccine)   | <5  | -                 | 0  | -                 | 0  | - | <5 | -                     |
| 8-14 days: second dose/positive test (after vaccine)  | 0   | -                 | 0  | -                 | 0  | - | <5 | -                     |
| 15-21 days: second dose/positive test (after vaccine) | <5  | -                 | 0  | -                 | 0  | - | 0  | -                     |
| 22-28 days: second dose/positive test (after vaccine) | <5  | -                 | 0  | -                 | 0  | - | 0  | -                     |
| 29-42 days: second dose/positive test (after vaccine) | <5  | -                 | 0  | -                 | 0  | - | 0  | -                     |
| -28-1 days: third dose                                | 0   | -                 | 0  | -                 | 0  | - |    |                       |
| 0 day: third dose                                     | 0   | -                 | 0  | -                 | 0  | - |    |                       |
| 1-7 days: third dose                                  | 0   | -                 | 0  | -                 | 0  | - |    |                       |
| 8-14 days: third dose                                 | 0   | -                 | 0  | -                 | 0  | - |    |                       |
| 15-21 days: third dose                                | 0   | -                 | 0  | -                 | 0  | - |    |                       |
| 22-28 days: third dose                                | 0   | -                 | 0  | -                 | 0  | - |    |                       |
| 29-42 days: third dose                                | 0   | -                 | 0  | -                 | 0  | - |    |                       |
| <b>Demyelinating disease</b>                          |     |                   |    |                   |    |   |    |                       |
| baseline                                              | 109 | 1.00 (1.00, 1.00) | 6  | 1.00 (1.00, 1.00) | <5 | - | 77 | 1.00 (1.00, 1.00)     |
| -28-1 days: first dose/positive test (before vaccine) | 7   | 1.17 (0.53, 2.61) | 0  | -                 | 0  | - | <5 | -                     |
| 0 day: first dose/positive test (before vaccine)      | 0   | -                 | 0  | -                 | 0  | - | <5 | -                     |

|                                                       |      |                   |     |                   |    |                   |      |                      |
|-------------------------------------------------------|------|-------------------|-----|-------------------|----|-------------------|------|----------------------|
| 1-7 days: first dose/positive test (before vaccine)   | <5   | -                 | 0   | -                 | 0  | -                 | <5   | -                    |
| 8-14 days: first dose/positive test (before vaccine)  | <5   | -                 | 0   | -                 | 0  | -                 | 0    | -                    |
| 15-21 days: first dose/positive test (before vaccine) | <5   | -                 | 0   | -                 | 0  | -                 | <5   | -                    |
| 22-28 days: first dose/positive test (before vaccine) | <5   | -                 | 0   | -                 | 0  | -                 | 0    | -                    |
| 29-42 days: first dose/positive test (before vaccine) | <5   | -                 | 0   | -                 | 0  | -                 | <5   | -                    |
| -28-1 days: second dose/positive test (after vaccine) | <5   | -                 | 0   | -                 | 0  | -                 | <5   | -                    |
| 0 day: second dose/positive test (after vaccine)      | 0    | -                 | 0   | -                 | 0  | -                 | 0    | -                    |
| 1-7 days: second dose/positive test (after vaccine)   | <5   | -                 | 0   | -                 | 0  | -                 | 0    | -                    |
| 8-14 days: second dose/positive test (after vaccine)  | <5   | -                 | 0   | -                 | 0  | -                 | <5   | -                    |
| 15-21 days: second dose/positive test (after vaccine) | 0    | -                 | 0   | -                 | 0  | -                 | 0    | -                    |
| 22-28 days: second dose/positive test (after vaccine) | <5   | -                 | 0   | -                 | 0  | -                 | 0    | -                    |
| 29-42 days: second dose/positive test (after vaccine) | <5   | -                 | 0   | -                 | 0  | -                 | 0    | -                    |
| -28-1 days: third dose                                | 0    | -                 | 0   | -                 | 0  | -                 |      |                      |
| 0 day: third dose                                     | 0    | -                 | 0   | -                 | 0  | -                 |      |                      |
| 1-7 days: third dose                                  | 0    | -                 | 0   | -                 | 0  | -                 |      |                      |
| 8-14 days: third dose                                 | 0    | -                 | 0   | -                 | 0  | -                 |      |                      |
| 15-21 days: third dose                                | <5   | -                 | 0   | -                 | 0  | -                 |      |                      |
| 22-28 days: third dose                                | 0    | -                 | 0   | -                 | 0  | -                 |      |                      |
| 29-42 days: third dose                                | 0    | -                 | 0   | -                 | 0  | -                 |      |                      |
| <b>Appendicitis</b>                                   |      |                   |     |                   |    |                   |      |                      |
| baseline                                              | 5527 | 1.00 (1.00, 1.00) | 121 | 1.00 (1.00, 1.00) | 16 | 1.00 (1.00, 1.00) | 3665 | 1.00 (1.00, 1.00)    |
| -28-1 days: first dose/positive test (before vaccine) | 214  | 0.65 (0.56, 0.74) | 0   | -                 | <5 | -                 | 88   | 0.67 (0.54, 0.83)    |
| 0 day: first dose/positive test (before vaccine)      | <5   | -                 | 0   | -                 | 0  | -                 | 78   | 16.47 (13.12, 20.67) |
| 1-7 days: first dose/positive test (before vaccine)   | 87   | 1.03 (0.83, 1.28) | 0   | -                 | 0  | -                 | 28   | 0.86 (0.59, 1.24)    |
| 8-14 days: first dose/positive test (before vaccine)  | 75   | 0.89 (0.71, 1.12) | 0   | -                 | 0  | -                 | 33   | 1.02 (0.72, 1.44)    |
| 15-21 days: first dose/positive test (before vaccine) | 70   | 0.82 (0.65, 1.04) | 0   | -                 | <5 | -                 | 39   | 1.20 (0.88, 1.66)    |
| 22-28 days: first dose/positive test (before vaccine) | 83   | 0.96 (0.77, 1.20) | 0   | -                 | <5 | -                 | 35   | 1.08 (0.77, 1.51)    |
| 29-42 days: first dose/positive test (before vaccine) | 146  | 0.85 (0.71, 1.00) | 0   | -                 | <5 | -                 | 74   | 1.13 (0.90, 1.43)    |
| -28-1 days: second dose/positive test (after vaccine) | 156  | 0.64 (0.54, 0.76) | 0   | -                 | <5 | -                 | 49   | 0.79 (0.59, 1.05)    |
| 0 day: second dose/positive test (after vaccine)      | <5   | -                 | 0   | -                 | 0  | -                 | 27   | 11.51 (7.84, 16.90)  |
| 1-7 days: second dose/positive test (after vaccine)   | 76   | 1.20 (0.95, 1.51) | 0   | -                 | 0  | -                 | 11   | 0.68 (0.38, 1.23)    |
| 8-14 days: second dose/positive test (after vaccine)  | 51   | 0.82 (0.62, 1.09) | 0   | -                 | <5 | -                 | 15   | 0.94 (0.56, 1.57)    |
| 15-21 days: second dose/positive test (after vaccine) | 52   | 0.84 (0.64, 1.11) | 0   | -                 | <5 | -                 | 19   | 1.19 (0.75, 1.88)    |
| 22-28 days: second dose/positive test (after vaccine) | 44   | 0.71 (0.53, 0.96) | 0   | -                 | <5 | -                 | 16   | 1.01 (0.61, 1.65)    |
| 29-42 days: second dose/positive test (after vaccine) | 107  | 0.89 (0.73, 1.08) | 0   | -                 | <5 | -                 | 36   | 1.13 (0.81, 1.58)    |
| -28-1 days: third dose                                | 36   | 0.77 (0.55, 1.08) | <5  | -                 | 0  | -                 |      |                      |
| 0 day: third dose                                     | 0    | -                 | 0   | -                 | 0  | -                 |      |                      |
| 1-7 days: third dose                                  | 11   | 0.99 (0.54, 1.79) | 0   | -                 | 0  | -                 |      |                      |
| 8-14 days: third dose                                 | 8    | 0.74 (0.37, 1.48) | <5  | -                 | 0  | -                 |      |                      |
| 15-21 days: third dose                                | 10   | 0.96 (0.51, 1.78) | <5  | -                 | 0  | -                 |      |                      |
| 22-28 days: third dose                                | 10   | 0.97 (0.52, 1.81) | <5  | -                 | 0  | -                 |      |                      |
| 29-42 days: third dose                                | 25   | 1.27 (0.85, 1.89) | <5  | -                 | 0  | -                 |      |                      |
| <b>Guillain-Barre Syndrome</b>                        |      |                   |     |                   |    |                   |      |                      |

|                                                       |     |                   |    |                   |    |   |     |                   |
|-------------------------------------------------------|-----|-------------------|----|-------------------|----|---|-----|-------------------|
| baseline                                              | 22  | -                 | <5 | -                 | 0  | - | 13  |                   |
| -28-1 days: first dose/positive test (before vaccine) | 0   | -                 | 0  | -                 | 0  | - | 0   |                   |
| 0 day: first dose/positive test (before vaccine)      | 0   | -                 | 0  | -                 | 0  | - | 0   |                   |
| 1-7 days: first dose/positive test (before vaccine)   | 0   | -                 | 0  | -                 | 0  | - | <5  |                   |
| 8-14 days: first dose/positive test (before vaccine)  | 0   | -                 | 0  | -                 | 0  | - | <5  |                   |
| 15-21 days: first dose/positive test (before vaccine) | <5  | -                 | 0  | -                 | 0  | - | <5  |                   |
| 22-28 days: first dose/positive test (before vaccine) | 0   | -                 | 0  | -                 | 0  | - | 0   |                   |
| 29-42 days: first dose/positive test (before vaccine) | <5  | -                 | 0  | -                 | 0  | - | <5  |                   |
| -28-1 days: second dose/positive test (after vaccine) | 0   | -                 | 0  | -                 | 0  | - | 0   |                   |
| 0 day: second dose/positive test (after vaccine)      | 0   | -                 | 0  | -                 | 0  | - | <5  |                   |
| 1-7 days: second dose/positive test (after vaccine)   | 0   | -                 | 0  | -                 | 0  | - | 0   |                   |
| 8-14 days: second dose/positive test (after vaccine)  | 0   | -                 | 0  | -                 | 0  | - | <5  |                   |
| 15-21 days: second dose/positive test (after vaccine) | 0   | -                 | 0  | -                 | 0  | - | 0   |                   |
| 22-28 days: second dose/positive test (after vaccine) | <5  | -                 | 0  | -                 | 0  | - | 0   |                   |
| 29-42 days: second dose/positive test (after vaccine) | 0   | -                 | 0  | -                 | 0  | - | 0   |                   |
| -28-1 days: third dose                                | 0   | -                 | 0  | -                 | 0  | - |     |                   |
| 0 day: third dose                                     | 0   | -                 | 0  | -                 | 0  | - |     |                   |
| 1-7 days: third dose                                  | 0   | -                 | 0  | -                 | 0  | - |     |                   |
| 8-14 days: third dose                                 | 0   | -                 | 0  | -                 | 0  | - |     |                   |
| 15-21 days: third dose                                | 0   | -                 | 0  | -                 | 0  | - |     |                   |
| 22-28 days: third dose                                | 0   | -                 | 0  | -                 | 0  | - |     |                   |
| 29-42 days: third dose                                | 0   | -                 | 0  | -                 | 0  | - |     |                   |
| <b>Angioedema</b>                                     |     |                   |    |                   |    |   |     |                   |
| baseline                                              | 226 | 1.00 (1.00, 1.00) | 5  | 1.00 (1.00, 1.00) | <5 | - | 164 | 1.00 (1.00, 1.00) |
| -28-1 days: first dose/positive test (before vaccine) | 9   | 0.77 (0.38, 1.53) | 0  | -                 | <5 | - | <5  | -                 |
| 0 day: first dose/positive test (before vaccine)      | <5  | -                 | 0  | -                 | 0  | - | 0   | -                 |
| 1-7 days: first dose/positive test (before vaccine)   | <5  | -                 | 0  | -                 | 0  | - | <5  | -                 |
| 8-14 days: first dose/positive test (before vaccine)  | <5  | -                 | 0  | -                 | 0  | - | <5  | -                 |
| 15-21 days: first dose/positive test (before vaccine) | <5  | -                 | 0  | -                 | 0  | - | 0   | -                 |
| 22-28 days: first dose/positive test (before vaccine) | 5   | 1.66 (0.67, 4.13) | 0  | -                 | 0  | - | 0   | -                 |
| 29-42 days: first dose/positive test (before vaccine) | 11  | 1.96 (1.04, 3.70) | 0  | -                 | <5 | - | 5   | 1.92 (0.77, 4.77) |
| -28-1 days: second dose/positive test (after vaccine) | 8   | 1.06 (0.51, 2.21) | 0  | -                 | 0  | - | <5  | -                 |
| 0 day: second dose/positive test (after vaccine)      | 0   | -                 | 0  | -                 | 0  | - | <5  | -                 |
| 1-7 days: second dose/positive test (after vaccine)   | <5  | -                 | 0  | -                 | <5 | - | <5  | -                 |
| 8-14 days: second dose/positive test (after vaccine)  | <5  | -                 | 0  | -                 | 0  | - | 0   | -                 |
| 15-21 days: second dose/positive test (after vaccine) | <5  | -                 | 0  | -                 | 0  | - | 0   | -                 |
| 22-28 days: second dose/positive test (after vaccine) | <5  | -                 | 0  | -                 | 0  | - | 0   | -                 |
| 29-42 days: second dose/positive test (after vaccine) | 5   | 1.14 (0.46, 2.82) | 0  | -                 | 0  | - | 0   | -                 |
| -28-1 days: third dose                                | <5  | -                 | 0  | -                 | 0  | - |     |                   |
| 0 day: third dose                                     | <5  | -                 | <5 | -                 | 0  | - |     |                   |
| 1-7 days: third dose                                  | <5  | -                 | <5 | -                 | 0  | - |     |                   |
| 8-14 days: third dose                                 | 0   | -                 | 0  | -                 | 0  | - |     |                   |
| 15-21 days: third dose                                | 0   | -                 | 0  | -                 | 0  | - |     |                   |

|                                                       |     |                   |    |                   |    |   |     |                       |
|-------------------------------------------------------|-----|-------------------|----|-------------------|----|---|-----|-----------------------|
| 22-28 days: third dose                                | 0   | -                 | 0  | -                 | 0  | - |     |                       |
| 29-42 days: third dose                                | 0   | -                 | 0  | -                 | 0  | - |     |                       |
| <b>Anaphylaxis</b>                                    |     |                   |    |                   |    |   |     |                       |
| baseline                                              | 398 | 1.00 (1.00, 1.00) | 10 | 1.00 (1.00, 1.00) | <5 | - | 265 | 1.00 (1.00, 1.00)     |
| -28-1 days: first dose/positive test (before vaccine) | 18  | 0.85 (0.52, 1.39) | 0  | -                 | 0  | - | 10  | 1.14 (0.60, 2.16)     |
| 0 day: first dose/positive test (before vaccine)      | <5  | -                 | 0  | -                 | 0  | - | <5  | -                     |
| 1-7 days: first dose/positive test (before vaccine)   | 5   | 0.82 (0.33, 2.01) | 0  | -                 | 0  | - | 0   | -                     |
| 8-14 days: first dose/positive test (before vaccine)  | 7   | 1.23 (0.57, 2.63) | 0  | -                 | 0  | - | 5   | 2.35 (0.96, 5.75)     |
| 15-21 days: first dose/positive test (before vaccine) | 12  | 2.21 (1.22, 4.01) | 0  | -                 | 0  | - | <5  | -                     |
| 22-28 days: first dose/positive test (before vaccine) | 7   | 1.28 (0.60, 2.74) | 0  | -                 | 0  | - | <5  | -                     |
| 29-42 days: first dose/positive test (before vaccine) | 13  | 1.21 (0.68, 2.14) | 0  | -                 | 0  | - | 8   | 1.87 (0.92, 3.83)     |
| -28-1 days: second dose/positive test (after vaccine) | 10  | 0.63 (0.33, 1.21) | 0  | -                 | 0  | - | <5  | -                     |
| 0 day: second dose/positive test (after vaccine)      | <5  | -                 | 0  | -                 | 0  | - | 7   | 48.30 (21.85, 106.77) |
| 1-7 days: second dose/positive test (after vaccine)   | <5  | -                 | 0  | -                 | 0  | - | 0   | -                     |
| 8-14 days: second dose/positive test (after vaccine)  | <5  | -                 | 0  | -                 | 0  | - | <5  | -                     |
| 15-21 days: second dose/positive test (after vaccine) | 5   | 1.22 (0.50, 2.99) | 0  | -                 | 0  | - | <5  | -                     |
| 22-28 days: second dose/positive test (after vaccine) | <5  | -                 | 0  | -                 | 0  | - | 0   | -                     |
| 29-42 days: second dose/positive test (after vaccine) | 6   | 0.71 (0.31, 1.60) | 0  | -                 | 0  | - | <5  | -                     |
| -28-1 days: third dose                                | 5   | 1.33 (0.53, 3.33) | <5 | -                 | 0  | - |     |                       |
| 0 day: third dose                                     | 0   | -                 | 0  | -                 | 0  | - |     |                       |
| 1-7 days: third dose                                  | <5  | -                 | 0  | -                 | 0  | - |     |                       |
| 8-14 days: third dose                                 | <5  | -                 | 0  | -                 | 0  | - |     |                       |
| 15-21 days: third dose                                | <5  | -                 | 0  | -                 | 0  | - |     |                       |
| 22-28 days: third dose                                | 0   | -                 | <5 | -                 | 0  | - |     |                       |
| 29-42 days: third dose                                | <5  | -                 | 0  | -                 | 0  | - |     |                       |



**Supplementary Table 9.** Incidence rate ratios and estimated number of excess events per million for individual outcomes in the 1-42 days following vaccination or a SARS-CoV-2 positive test (before or after vaccination) compared to baseline period in young adults aged 18-24 years, and stratified by sex. Cells with a hyphen are suppressed; N – number of events; IRR – incidence rate ratio; CI – confidence interval.

|                                              | BNT162b2 vaccine |                   |                        | mRNA-1273 vaccine |                     |                        | ChAdOX1 vaccine |                   |                        | Positive SARS-CoV-2 test |                    |                        |
|----------------------------------------------|------------------|-------------------|------------------------|-------------------|---------------------|------------------------|-----------------|-------------------|------------------------|--------------------------|--------------------|------------------------|
|                                              | N                | IRR (95% CI)      | Excess events (95% CI) | N                 | IRR (95% CI)        | Excess events (95% CI) | N               | IRR (95% CI)      | Excess events (95% CI) | N                        | IRR (95% CI)       | Excess events (95% CI) |
| <b>Total population</b>                      |                  |                   |                        |                   |                     |                        |                 |                   |                        |                          |                    |                        |
| <b>Multisystem inflammatory syndrome</b>     |                  |                   |                        |                   |                     |                        |                 |                   |                        |                          |                    |                        |
| First dose/positive test (before vaccine)    | <5               | -                 | -                      | 0                 | -                   | -                      | <5              | -                 | -                      | 5                        | 5.72 (1.86, 17.59) | 6 (4, 7)               |
| Second dose/positive test (after vaccine)    | <5               | -                 | -                      | 0                 | -                   | -                      | <5              | -                 | -                      | <5                       | -                  | -                      |
| Third dose                                   | 0                | -                 | -                      | 0                 | -                   | -                      | 0               | -                 | -                      |                          |                    |                        |
| <b>Myocarditis</b>                           |                  |                   |                        |                   |                     |                        |                 |                   |                        |                          |                    |                        |
| First dose/positive test (before vaccine)    | 26               | 1.04 (0.66, 1.63) | 0                      | 9                 | 2.53 (1.12, 5.71)   | 15 (3, 21)             | 5               | 1.54 (0.59, 4.03) | 0                      | 19                       | 3.25 (1.95, 5.41)  | 20 (14, 24)            |
| Second dose/positive test (after vaccine)    | 49               | 2.25 (1.59, 3.19) | 10 (6, 12)             | 29                | 12.32 (6.81, 22.28) | 86 (80, 89)            | 9               | 1.80 (0.85, 3.81) | 0                      | <5                       | -                  | -                      |
| Third dose                                   | 27               | 2.84 (1.78, 4.51) | 12 (8, 14)             | 13                | 4.15 (2.11, 8.14)   | 13 (9,15)              | 0               | -                 | -                      |                          |                    |                        |
| <b>Immune or idiopathic thrombocytopenia</b> |                  |                   |                        |                   |                     |                        |                 |                   |                        |                          |                    |                        |
| First dose/positive test (before vaccine)    | 58               | 0.88 (0.67, 1.17) | 0                      | <5                | -                   | -                      | 40              | 1.47 (1.02, 2.12) | 24 (2, 39)             | 58                       | 3.88 (2.88, 5.21)  | 66 (58, 72)            |
| Second dose/positive test (after vaccine)    | 55               | 0.99 (0.74, 1.32) | 0                      | 6                 | 0.96 (0.42, 2.24)   | 0                      | 29              | 1.09 (0.72, 1.63) | 0                      | 15                       | 2.15 (1.27, 3.64)  | 9 (4, 12)              |
| Third dose                                   | 32               | 0.76 (0.51, 1.12) | 0                      | 12                | 1.02 (0.56, 1.87)   | 0                      | 0               | -                 | -                      |                          |                    |                        |
| <b>Epilepsy</b>                              |                  |                   |                        |                   |                     |                        |                 |                   |                        |                          |                    |                        |
| First dose/positive test (before vaccine)    | 168              | 0.88 (0.75, 1.04) | 0                      | 7                 | 0.62 (0.29, 1.33)   | 0                      | 215             | 1.02 (0.86, 1.20) | 0                      | 83                       | 1.68 (1.33, 2.11)  | 52 (32, 67)            |
| Second dose/positive test (after vaccine)    | 156              | 0.91 (0.77, 1.07) | 0                      | 6                 | 0.66 (0.29, 1.50)   | 0                      | 210             | 0.95 (0.81, 1.12) | 0                      | 42                       | 1.50 (1.10, 2.04)  | 15 (4, 24)             |
| Third dose                                   | 172              | 1.00 (0.85, 1.19) | 0                      | 40                | 0.79 (0.57, 1.11)   | 0                      | <5              | -                 | -                      |                          |                    |                        |
| <b>Acute pancreatitis</b>                    |                  |                   |                        |                   |                     |                        |                 |                   |                        |                          |                    |                        |
| First dose/positive test (before vaccine)    | 70               | 1.08 (0.83, 1.41) | 0                      | 8                 | 1.38 (0.65, 2.92)   | 0                      | 10              | 0.45 (0.24, 0.87) | 0                      | 30                       | 1.82 (1.24, 2.69)  | 21 (9, 29)             |
| Second dose/positive test (after vaccine)    | 63               | 1.13 (0.85, 1.49) | 0                      | 5                 | 1.25 (0.49, 3.15)   | 0                      | 26              | 1.15 (0.75, 1.76) | 0                      | 6                        | 0.79 (0.35, 1.79)  | 0                      |
| Third dose                                   | 39               | 1.22 (0.86, 1.73) | 0                      | 13                | 0.88 (0.48, 1.61)   | 0                      | <5              | -                 | -                      |                          |                    |                        |
| <b>Myositis</b>                              |                  |                   |                        |                   |                     |                        |                 |                   |                        |                          |                    |                        |

|                                             |     |                   |   |    |                   |   |     |                   |   |     |                   |            |
|---------------------------------------------|-----|-------------------|---|----|-------------------|---|-----|-------------------|---|-----|-------------------|------------|
| First dose/positive test (before vaccine)   | <5  | -                 | - | 0  | -                 | - | <5  | -                 | - | <5  | -                 | -          |
| Second dose/positive test (after vaccine)   | <5  | -                 | - | <5 | -                 | - | <5  | -                 | - | <5  | -                 | -          |
| Third dose                                  | <5  | -                 | - | 0  | -                 | - | 0   | -                 | - |     |                   |            |
| <b>Acute disseminated encephalomyelitis</b> |     |                   |   |    |                   |   |     |                   |   |     |                   |            |
| First dose/positive test (before vaccine)   | 12  | 1.77 (0.93, 3.39) | 0 | <5 | -                 | - | <5  | -                 | - | <5  | -                 | -          |
| Second dose/positive test (after vaccine)   | 8   | 1.20 (0.56, 2.57) | 0 | <5 | -                 | - | 6   | 2.13 (0.82, 5.53) | 0 | <5  | -                 | -          |
| Third dose                                  | 5   | 1.00 (0.37, 2.66) | 0 | <5 | -                 | - | 0   | -                 | - |     |                   |            |
| <b>Demyelinating disease</b>                |     |                   |   |    |                   |   |     |                   |   |     |                   |            |
| First dose/positive test (before vaccine)   | 11  | 0.57 (0.30, 1.08) | 0 | 0  | -                 | - | 7   | 1.03 (0.45, 2.37) | 0 | <5  | -                 | -          |
| Second dose/positive test (after vaccine)   | 11  | 0.69 (0.37, 1.30) | 0 | <5 | -                 | - | 5   | 0.68 (0.26, 1.76) | 0 | <5  | -                 | -          |
| Third dose                                  | 11  | 0.97 (0.51, 1.88) | 0 | <5 | -                 | - | 0   | -                 | - |     |                   |            |
| <b>Anaphylaxis</b>                          |     |                   |   |    |                   |   |     |                   |   |     |                   |            |
| First dose/positive test (before vaccine)   | 40  | 1.02 (0.72, 1.45) | 0 | <5 | -                 | - | 19  | 1.29 (0.76, 2.16) | 0 | 10  | 1.09 (0.57, 2.09) | 0          |
| Second dose/positive test (after vaccine)   | 30  | 0.98 (0.66, 1.44) | 0 | <5 | -                 | - | 20  | 1.26 (0.76, 2.09) | 0 | <5  | -                 | -          |
| Third dose                                  | 16  | 1.00 (0.57, 1.74) | 0 | 6  | 1.06 (0.45, 2.48) | 0 | 0   | -                 | - |     |                   |            |
| <b>Appendicitis</b>                         |     |                   |   |    |                   |   |     |                   |   |     |                   |            |
| First dose/positive test (before vaccine)   | 470 | 0.99 (0.89, 1.10) | 0 | 60 | 1.16 (0.88, 1.53) | 0 | 111 | 1.10 (0.89, 1.35) | 0 | 117 | 1.22 (1.01, 1.48) | 33 (2, 59) |
| Second dose/positive test (after vaccine)   | 382 | 0.92 (0.82, 1.03) | 0 | 48 | 1.12 (0.83, 1.51) | 0 | 94  | 1.03 (0.83, 1.28) | 0 | 57  | 1.23 (0.94, 1.61) | 0          |
| Third dose                                  | 207 | 0.99 (0.85, 1.16) | 0 | 93 | 0.98 (0.79, 1.22) | 0 | 0   | -                 | - |     |                   |            |
| <b>Guillain-Barre Syndrome</b>              |     |                   |   |    |                   |   |     |                   |   |     |                   |            |
| First dose/positive test (before vaccine)   | <5  | -                 | - | <5 | -                 | - | <5  | -                 | - | <5  | -                 | -          |
| Second dose/positive test (after vaccine)   | 5   | 1.39 (0.50, 3.86) | 0 | 0  | -                 | - | 0   | -                 | - | 0   | -                 | -          |
| Third dose                                  | <5  | -                 | - | <5 | -                 | - | 0   | -                 | - |     |                   |            |
| <b>Angioedema</b>                           |     |                   |   |    |                   |   |     |                   |   |     |                   |            |
| First dose/positive test (before vaccine)   | 28  | 0.87 (0.57, 1.32) | 0 | <5 | -                 | - | 17  | 1.21 (0.70, 2.10) | 0 | 7   | 0.87 (0.40, 1.88) | 0          |
| Second dose/positive test (after vaccine)   | 25  | 1.01 (0.65, 1.56) | 0 | <5 | -                 | - | 13  | 0.98 (0.53, 1.80) | 0 | 6   | 2.15 (0.94, 4.94) |            |

|                                              |    |                   |   |    |                   |   |     |                   |   |    |                    |              |
|----------------------------------------------|----|-------------------|---|----|-------------------|---|-----|-------------------|---|----|--------------------|--------------|
| Third dose                                   | 6  | 0.51 (0.22, 1.17) | 0 | <5 | -                 | - | 0   | -                 | - |    |                    |              |
| <b>Females</b>                               |    |                   |   |    |                   |   |     |                   |   |    |                    |              |
| <b>Multisystem inflammatory syndrome</b>     |    |                   |   |    |                   |   |     |                   |   |    |                    |              |
| First dose/positive test (before vaccine)    | <5 | -                 | - | 0  | -                 | - | <5  | -                 | - | <5 | -                  | -            |
| Second dose/positive test (after vaccine)    | <5 | -                 | - | 0  | -                 | - | <5  | -                 | - | <5 | -                  | -            |
| Third dose                                   | 0  | -                 | - | 0  | -                 | - | 0   | -                 | - |    |                    |              |
| <b>Myocarditis</b>                           |    |                   |   |    |                   |   |     |                   |   |    |                    |              |
| First dose/positive test (before vaccine)    | 7  | 1.17 (0.47, 2.95) | 0 | <5 | -                 | - | <5  | -                 | - | 6  | 6.50 (2.36, 17.86) | 18 (12, 20)  |
| Second dose/positive test (after vaccine)    | 5  | 1.28 (0.48, 3.36) | 0 | <5 | -                 | - | 0   | -                 | - | <5 | -                  | -            |
| Third dose                                   | <5 | -                 | - | <5 | -                 | - | 0   | -                 | - |    |                    |              |
| <b>Immune or idiopathic thrombocytopenia</b> |    |                   |   |    |                   |   |     |                   |   |    |                    |              |
| First dose/positive test (before vaccine)    | 36 | 0.90 (0.63, 1.29) | 0 | <5 | -                 | - | 23  | 1.27 (0.79, 2.04) | 0 | 33 | 3.24 (2.20, 4.77)  | 80 (63, 91)  |
| Second dose/positive test (after vaccine)    | 39 | 1.17 (0.83, 1.65) | 0 | <5 | -                 | - | 17  | 1.04 (0.62, 1.76) | 0 | 6  | 1.25 (0.55, 2.84)  | 0            |
| Third dose                                   | 21 | 0.78 (0.48, 1.27) | 0 | 5  | 0.60 (0.24, 1.50) | 0 | 0   | -                 | - |    |                    |              |
| <b>Epilepsy</b>                              |    |                   |   |    |                   |   |     |                   |   |    |                    |              |
| First dose/positive test (before vaccine)    | 91 | 0.82 (0.66, 1.02) | 0 | <5 | -                 | - | 122 | 0.98 (0.79, 1.21) | 0 | 56 | 1.79 (1.35, 2.38)  | 87 (51, 113) |
| Second dose/positive test (after vaccine)    | 81 | 0.82 (0.65, 1.04) | 0 | <5 | -                 | - | 113 | 0.95 (0.76, 1.18) | 0 | 22 | 1.18 (0.77, 1.81)  | 0            |
| Third dose                                   | 88 | 0.85 (0.67, 1.07) | 0 | 22 | 0.73 (0.46, 1.14) | 0 | <5  | -                 | - |    |                    |              |
| <b>Acute pancreatitis</b>                    |    |                   |   |    |                   |   |     |                   |   |    |                    |              |
| First dose/positive test (before vaccine)    | 45 | 1.06 (0.76, 1.47) | 0 | 7  | 1.91 (0.84, 4.33) | 0 | 6   | 0.38 (0.17, 0.89) | 0 | 21 | 1.91 (1.20, 3.03)  | 35 (12, 49)  |
| Second dose/positive test (after vaccine)    | 38 | 1.07 (0.75, 1.52) | 0 | <5 | -                 | - | 17  | 1.07 (0.63, 1.82) | 0 | 5  | 0.88 (0.36, 2.15)  |              |
| Third dose                                   | 27 | 1.23 (0.81, 1.88) |   | 8  | 0.85 (0.40, 1.77) | 0 | <5  |                   |   |    |                    |              |
| <b>Myositis</b>                              |    |                   |   |    |                   |   |     |                   |   |    |                    |              |
| First dose/positive test (before vaccine)    | <5 | -                 | - | 0  | -                 | - | 0   | -                 | - | 0  | -                  | -            |
| Second dose/positive test (after vaccine)    | 0  | -                 | - | 0  | -                 | - | <5  | -                 | - | <5 | -                  | -            |
| Third dose                                   | <5 | -                 | - | 0  | -                 | - | 0   | -                 | - |    |                    |              |
| <b>Acute disseminated encephalomyelitis</b>  |    |                   |   |    |                   |   |     |                   |   |    |                    |              |

|                                           |     |                   |   |    |                   |   |    |                   |   |    |                   |   |
|-------------------------------------------|-----|-------------------|---|----|-------------------|---|----|-------------------|---|----|-------------------|---|
| First dose/positive test (before vaccine) | <5  | -                 | - | 0  | -                 | - | <5 | -                 | - | <5 | -                 | - |
| Second dose/positive test (after vaccine) | <5  | -                 | - | 0  | -                 | - | <5 | -                 | - | 0  | -                 | - |
| Third dose                                | <5  | -                 | - | <5 | -                 | - | 0  | -                 | - |    |                   |   |
| <b>Demyelinating disease</b>              |     |                   |   |    |                   |   |    |                   |   |    |                   |   |
| First dose/positive test (before vaccine) | 8   | 0.56 (0.27, 1.17) | 0 | 0  | -                 | - | 6  | 1.05 (0.42, 2.61) | 0 | <5 | -                 | - |
| Second dose/positive test (after vaccine) | 8   | 0.62 (0.30, 1.30) | 0 | <5 | -                 | - | 5  | 0.83 (0.31, 2.21) | 0 | <5 | -                 | - |
| Third dose                                | 8   | 0.94 (0.44, 2.03) | 0 | <5 | -                 | - | 0  | -                 | - |    |                   |   |
| <b>Anaphylaxis</b>                        |     |                   |   |    |                   |   |    |                   |   |    |                   |   |
| First dose/positive test (before vaccine) | 24  | 1.00 (0.63, 1.57) | 0 | <5 | -                 | - | 11 | 1.06 (0.54, 2.07) | 0 | <5 | -                 | - |
| Second dose/positive test (after vaccine) | 19  | 0.96 (0.59, 1.57) | 0 | <5 | -                 | - | 14 | 1.36 (0.74, 2.51) | 0 | <5 | -                 | - |
| Third dose                                | 9   | 0.87 (0.41, 1.84) | 0 | 5  | 1.63 (0.63, 4.27) | 0 | 0  | -                 | - |    |                   |   |
| <b>Appendicitis</b>                       |     |                   |   |    |                   |   |    |                   |   |    |                   |   |
| First dose/positive test (before vaccine) | 216 | 0.97 (0.83, 1.13) | 0 | 23 | 0.99 (0.64, 1.54) | 0 | 69 | 1.09 (0.84, 1.41) | 0 | 54 | 1.16 (0.87, 1.53) | 0 |
| Second dose/positive test (after vaccine) | 187 | 0.94 (0.80, 1.11) | 0 | 27 | 1.29 (0.86, 1.94) | 0 | 66 | 1.21 (0.93, 1.58) | 0 | 27 | 0.99 (0.67, 1.45) | 0 |
| Third dose                                | 98  | 0.82 (0.66, 1.03) | 0 | 48 | 1.01 (0.74, 1.38) | 0 | 0  | -                 | - |    |                   |   |
| <b>Guillain-Barre Syndrome</b>            |     |                   |   |    |                   |   |    |                   |   |    |                   |   |
| First dose/positive test (before vaccine) | <5  | -                 | - | <5 | -                 | - | 0  | -                 | - | <5 | -                 | - |
| Second dose/positive test (after vaccine) | <5  | -                 | - | 0  | -                 | - | 0  | -                 | - | 0  | -                 | - |
| Third dose                                | <5  | -                 | - | <5 | -                 | - | 0  | -                 | - |    |                   |   |
| <b>Angioedema</b>                         |     |                   |   |    |                   |   |    |                   |   |    |                   |   |
| First dose/positive test (before vaccine) | 19  | 0.80 (0.48, 1.33) | 0 | <5 | -                 | - | 13 | 1.25 (0.66, 2.35) | 0 | 5  | 0.82 (0.33, 2.03) | 0 |
| Second dose/positive test (after vaccine) | 22  | 1.17 (0.73, 1.88) | 0 | <5 | -                 | - | 10 | 1.01 (0.51, 2.02) | 0 | 5  | 2.18 (0.88, 5.42) | 0 |
| Third dose                                | <5  | -                 | - | <5 | -                 | - | 0  | -                 | - |    |                   |   |
| <b>Males</b>                              |     |                   |   |    |                   |   |    |                   |   |    |                   |   |
| <b>Multisystem inflammatory syndrome</b>  |     |                   |   |    |                   |   |    |                   |   |    |                   |   |
| First dose/positive test (before vaccine) | 0   | -                 | - | 0  | -                 | - | 0  | -                 | - | <5 | -                 | - |

|                                              |    |                   |             |    |                     |                |    |                   |            |    |                   |             |
|----------------------------------------------|----|-------------------|-------------|----|---------------------|----------------|----|-------------------|------------|----|-------------------|-------------|
| Second dose/positive test (after vaccine)    | 0  | -                 | -           | 0  | -                   | -              | 0  | -                 | -          | 0  | -                 | -           |
| Third dose                                   | 0  | -                 | -           | 0  | -                   | -              | 0  | -                 | -          |    |                   |             |
| <b>Myocarditis</b>                           |    |                   |             |    |                     |                |    |                   |            |    |                   |             |
| First dose/positive test (before vaccine)    | 19 | 1.01 (0.60, 1.70) | 0           | 8  | 3.57 (1.52, 8.39)   | 39 (19, 48)    | <5 | -                 | -          | 13 | 2.71 (1.48, 4.97) | 32 (16, 40) |
| Second dose/positive test (after vaccine)    | 44 | 2.50 (1.71, 3.66) | 23 (16, 28) | 25 | 13.97 (7.23, 27.02) | 173 (160, 179) | 9  | 2.70 (1.23, 5.90) | 29 (9, 38) | <5 | -                 | -           |
| Third dose                                   | 24 | 3.24 (1.97, 5.35) | 28 (20, 33) | 10 | 4.74 (2.23, 10.08)  | 26 (18, 29)    | 0  | -                 | -          |    |                   |             |
| <b>Immune or idiopathic thrombocytopenia</b> |    |                   |             |    |                     |                |    |                   |            |    |                   |             |
| First dose/positive test (before vaccine)    | 22 | 0.85 (0.53, 1.35) | 0           | <5 | -                   | -              | 17 | 1.87 (1.05, 3.33) | 38 (4, 58) | 25 | 5.18 (3.23, 8.28) | 78 (67, 85) |
| Second dose/positive test (after vaccine)    | 16 | 0.70 (0.41, 1.20) | 0           | <5 | -                   | -              | 12 | 1.18 (0.62, 2.24) | 0          | 9  | 4.40 (2.18, 8.91) | 22 (15, 25) |
| Third dose                                   | 11 | 0.73 (0.38, 1.42) | 0           | 7  | 2.10 (0.92, 4.83)   | 0              | 0  | -                 | -          |    |                   |             |
| <b>Epilepsy</b>                              |    |                   |             |    |                     |                |    |                   |            |    |                   |             |
| First dose/positive test (before vaccine)    | 77 | 0.96 (0.75, 1.22) | 0           | <5 | -                   | -              | 93 | 1.08 (0.84, 1.40) | 0          | 27 | 1.48 (0.99, 2.21) | 0           |
| Second dose/positive test (after vaccine)    | 75 | 1.01 (0.79, 1.29) | 0           | <5 | -                   | -              | 97 | 0.96 (0.75, 1.21) | 0          | 20 | 2.09 (1.33, 3.29) | 32 (15, 43) |
| Third dose                                   | 84 | 1.24 (0.97, 1.58) | 0           | 18 | 0.90 (0.55, 1.49)   | 0              | <5 | -                 | -          |    |                   |             |
| <b>Acute pancreatitis</b>                    |    |                   |             |    |                     |                |    |                   |            |    |                   |             |
| First dose/positive test (before vaccine)    | 25 | 1.15 (0.73, 1.83) | 0           | <5 | -                   | -              | <5 | -                 | -          | 9  | 1.66 (0.82, 3.37) | 0           |
| Second dose/positive test (after vaccine)    | 25 | 1.22 (0.77, 1.92) | 0           | <5 | -                   | -              | 9  | 1.34 (0.64, 2.79) | 0          | <5 | -                 | -           |
| Third dose                                   | 12 | 1.16 (0.61, 2.19) | 0           | 5  | 0.92 (0.32, 2.63)   | 0              | 0  | -                 | -          |    |                   |             |
| <b>Myositis</b>                              |    |                   |             |    |                     |                |    |                   |            |    |                   |             |
| First dose/positive test (before vaccine)    | 0  | -                 | -           | 0  | -                   | -              | <5 | -                 | -          | <5 | -                 | -           |
| Second dose/positive test (after vaccine)    | <5 | -                 | -           | <5 | -                   | -              | 0  | -                 | -          | 0  | -                 | -           |
| Third dose                                   | 0  | -                 | -           | 0  | -                   | -              | 0  | -                 | -          |    |                   |             |
| <b>Acute disseminated encephalomyelitis</b>  |    |                   |             |    |                     |                |    |                   |            |    |                   |             |
| First dose/positive test (before vaccine)    | 8  | 3.79 (1.59, 9.02) | 5 (2, 6)    | <5 | -                   | -              | <5 | -                 | -          | <5 | -                 | -           |
| Second dose/positive test (after vaccine)    | <5 | -                 | -           | <5 | -                   | -              | <5 | -                 | -          | <5 | -                 | -           |
| Third dose                                   | <5 | -                 | -           | 0  | -                   | -              | 0  | -                 | -          |    |                   |             |
| <b>Demyelinating disease</b>                 |    |                   |             |    |                     |                |    |                   |            |    |                   |             |

|                                           |     |                   |   |    |                   |   |    |                   |   |    |                   |            |
|-------------------------------------------|-----|-------------------|---|----|-------------------|---|----|-------------------|---|----|-------------------|------------|
| First dose/positive test (before vaccine) | <5  | -                 | - | 0  | -                 | - | <5 | -                 | - | <5 | -                 | -          |
| Second dose/positive test (after vaccine) | <5  | -                 | - | <5 | -                 | - | 0  | -                 | - | 0  | -                 | -          |
| Third dose                                | <5  | -                 | - | <5 | -                 | - | 0  | -                 | - |    |                   |            |
| <b>Anaphylaxis</b>                        |     |                   |   |    |                   |   |    |                   |   |    |                   |            |
| First dose/positive test (before vaccine) | 16  | 1.10 (0.62, 1.96) | 0 | <5 | -                 | - | 8  | 1.81 (0.78, 4.20) | 0 | 6  | 2.13 (0.88, 5.14) | 0          |
| Second dose/positive test (after vaccine) | 11  | 1.03 (0.54, 1.98) | 0 | <5 | -                 | - | 6  | 1.10 (0.43, 2.79) | 0 | 0  | -                 | -          |
| Third dose                                | 7   | 1.16 (0.51, 2.65) | 0 | <5 | -                 | - | 0  | -                 | - |    |                   |            |
| <b>Appendicitis</b>                       |     |                   |   |    |                   |   |    |                   |   |    |                   |            |
| First dose/positive test (before vaccine) | 254 | 1.01 (0.87, 1.18) | 0 | 37 | 1.30 (0.90, 1.86) | 0 | 42 | 1.11 (0.80, 1.54) | 0 | 63 | 1.29 (0.99, 1.67) | 0          |
| Second dose/positive test (after vaccine) | 195 | 0.91 (0.78, 1.07) | 0 | 21 | 0.96 (0.61, 1.50) | 0 | 28 | 0.78 (0.53, 1.16) | 0 | 30 | 1.57 (1.08, 2.26) | 34 (7, 52) |
| Third dose                                | 109 | 1.20 (0.97, 1.49) | 0 | 45 | 0.96 (0.70, 1.31) | 0 | 0  | -                 | - |    |                   |            |
| <b>Guillain-Barre Syndrome</b>            |     |                   |   |    |                   |   |    |                   |   |    |                   |            |
| First dose/positive test (before vaccine) | <5  | -                 | - | 0  | -                 | - | <5 | -                 | - | 0  | -                 | -          |
| Second dose/positive test (after vaccine) | <5  | -                 | - | 0  | -                 | - | 0  | -                 | - | 0  | -                 | -          |
| Third dose                                | 0   | -                 | - | <5 | -                 | - | 0  | -                 | - |    |                   |            |
| <b>Angioedema</b>                         |     |                   |   |    |                   |   |    |                   |   |    |                   |            |
| First dose/positive test (before vaccine) | 9   | 1.04 (0.47, 2.29) | 0 | 0  | -                 | - | <5 | -                 | - | <5 | -                 | -          |
| Second dose/positive test (after vaccine) | <5  | -                 | - | 0  | -                 | - | <5 | -                 | - | <5 | -                 | -          |
| Third dose                                | <5  | -                 | - | 0  | -                 | - | 0  | -                 | - |    |                   |            |

**Supplementary Table 10.** Characteristics of unvaccinated and vaccinated young people and those testing positive for SARS-CoV-2 aged 5-11, 12-17 and 18-24 years included in the QResearch primary care database in England between 8<sup>th</sup> December 2020 until 7<sup>th</sup> August 2022. Cells with <5 are suppressed. Data are presented as counts (column %).

|                                                            | Unvaccinated     | Dose 1         |           |           | Dose 2        |           |         | Dose 3     |           |         | Positive SARS-CoV-2 test | Total            |
|------------------------------------------------------------|------------------|----------------|-----------|-----------|---------------|-----------|---------|------------|-----------|---------|--------------------------|------------------|
|                                                            |                  | BNT162b2       | mRNA-1273 | ChAdOX1   | BNT162b2      | mRNA-1273 | ChAdOX1 | BNT162b2   | mRNA-1273 | ChAdOX1 |                          |                  |
| <b>5-11 years</b>                                          |                  |                |           |           |               |           |         |            |           |         |                          |                  |
| <b>Total N</b>                                             | 1,420,607        | 160,208        | 20        | 34        | 83,797        | 9         | <5      | 244        | 0         | 0       | 418,680                  | 1,580,869        |
| <b>Mean age (SD)</b>                                       | 8.3 (2.1)        | 8.7 (2.0)      | 8.0 (1.9) | 8.6 (1.6) | 8.8 (1.9)     | 9.3 (1.3) | -       | 10.1 (1.7) | -         | -       | 9.5 (1.9)                | 8.4 (2.0)        |
| <b>Sex, N (%)</b>                                          |                  |                |           |           |               |           |         |            |           |         |                          |                  |
| Female                                                     | 693,571 (48.8)   | 77,910 (48.6)  | 13 (65.0) | 19 (55.9) | 40,637 (48.5) | <5        | <5      | 101 (41.4) | 0         | 0       | 207,170 (49.5)           | 771,513 (48.8)   |
| Male                                                       | 727,036 (51.2)   | 82,298 (51.4)  | 7 (35.0)  | 15 (44.1) | 43,160 (51.5) | <5        | <5      | 143 (58.6) | 0         | 0       | 211,510 (50.5)           | 809,356 (51.2)   |
| <b>Ethnicity, N (%)</b>                                    |                  |                |           |           |               |           |         |            |           |         |                          |                  |
| White                                                      | 707,439 (49.8)   | 90,627 (56.6)  | 10 (50.0) | 18 (52.9) | 48,235 (57.6) | 7 (77.8)  | <5      | 176 (72.1) | 0         | 0       | 253,035 (60.4)           | 798,094 (50.5)   |
| Indian                                                     | 34,714 (2.4)     | 8,730 (5.4)    | <5        | <5        | 4,679 (5.6)   | <5        | <5      | <5         | 0         | 0       | 10,603 (2.5)             | 43,444 (2.7)     |
| Pakistani                                                  | 40,461 (2.8)     | 2,469 (1.5)    | <5        | <5        | 1,031 (1.2)   | <5        | <5      | <5         | 0         | 0       | 6,989 (1.7)              | 42,930 (2.7)     |
| Bangladeshi                                                | 23,309 (1.6)     | 2,346 (1.5)    | <5        | <5        | 1,139 (1.4)   | <5        | <5      | <5         | 0         | 0       | 3,582 (0.9)              | 25,655 (1.6)     |
| Other Asian                                                | 26,374 (1.9)     | 3,444 (2.1)    | <5        | <5        | 1,709 (2.0)   | <5        | <5      | <5         | 0         | 0       | 5,810 (1.4)              | 29,820 (1.9)     |
| Black Caribbean                                            | 8,914 (0.6)      | 176 (0.1)      | <5        | <5        | 91 (0.1)      | <5        | <5      | <5         | 0         | 0       | 1,396 (0.3)              | 9,090 (0.6)      |
| Black African                                              | 46,541 (3.3)     | 1,977 (1.2)    | <5        | <5        | 909 (1.1)     | <5        | <5      | <5         | 0         | 0       | 5,413 (1.3)              | 48,518 (3.1)     |
| Chinese                                                    | 7,250 (0.5)      | 1,627 (1.0)    | <5        | <5        | 956 (1.1)     | <5        | <5      | <5         | 0         | 0       | 1,878 (0.4)              | 8,878 (0.6)      |
| Other                                                      | 94,749 (6.7)     | 7,371 (4.6)    | <5        | <5        | 3,817 (4.6)   | <5        | <5      | 10 (4.1)   | 0         | 0       | 20,213 (4.8)             | 102,123 (6.5)    |
| Missing                                                    | 430,856 (30.3)   | 41,441 (25.9)  | 6 (30.0)  | 14 (41.2) | 21,231 (25.3) | <5        | <5      | 48 (19.7)  | 0         | 0       | 109,761 (26.2)           | 472,317 (29.9)   |
| <b>Positive SARS-CoV-2 test during study period, N (%)</b> |                  |                |           |           |               |           |         |            |           |         |                          |                  |
| None                                                       | 1,071,114 (75.4) | 91,044 (56.8)  | 14 (70.0) | 17 (50.0) | 46,595 (55.6) | <5        | <5      | 130 (53.3) | 0         | 0       | 0                        | 1,162,189 (73.5) |
| Prior to first vaccine dose                                | 349,493 (24.6)   | 67,610 (42.2)  | 6 (30.0)  | 16 (47.1) | 36,380 (43.4) | 5 (55.6)  | 0       | 94 (38.5)  | 0         | 0       | 417,125 (99.6)           | 417,125 (26.4)   |
| After first vaccine dose                                   | 0                | 1,554 (1.0)    | 0         | <5        | 822 (1.0)     | 0         | 0       | 20 (8.2)   | 0         | 0       | 1,555 (0.4)              | 1,555 (0.1)      |
| <b>Vaccine doses received, N (%)</b>                       |                  |                |           |           |               |           |         |            |           |         |                          |                  |
| No vaccine                                                 | 1,420,607 (100)  | -              | -         | -         | -             | -         | -       | -          | -         | -       | 349,493 (83.5)           | 1,420,607 (89.9) |
| Dose 1                                                     | -                | 160,208 (100)  | 20 (100)  | 34 (100)  | 83,797 (100)  | 9 (100)   | <5      | 244 (100)  | 0         | 0       | 69,187 (16.5)            | 160,262 (10.1)   |
| Dose 2                                                     | -                | 83,804 (52.3)  | <5        | <5        | 83,797 (100)  | 9 (100)   | <5      | 244 (100)  | 0         | 0       | 37,207 (8.9)             | 83,808 (5.3)     |
| Dose 3                                                     | -                | 243 (0.2)      | 0         | <5        | 243 (0.3)     | 0         | <5      | 244 (100)  | 0         | 0       | 114 (<0.1)               | 244 (<0.1)       |
| <b>Any comorbidity, N (%)</b>                              |                  |                |           |           |               |           |         |            | 0         | 0       |                          |                  |
| No                                                         | 1,291,321 (90.9) | 137,795 (86.0) | 20 (100)  | 27 (79.4) | 70,996 (84.7) | 5 (55.6)  | <5      | 92 (37.7)  | 0         | 0       | 367,519 (87.8)           | 1,429,163 (90.4) |
| Yes                                                        | 129,286 (9.1)    | 22,413 (14.0)  | 0         | 7 (20.6)  | 12,801 (15.3) | <5        | <5      | 152 (62.3) | 0         | 0       | 51,161 (12.2)            | 151,706 (9.6)    |
| <b>12-17 years</b>                                         |                  |                |           |           |               |           |         |            |           |         |                          |                  |

|                                                            |                |                |               |               |                |               |               |                |                |            |                |                  |
|------------------------------------------------------------|----------------|----------------|---------------|---------------|----------------|---------------|---------------|----------------|----------------|------------|----------------|------------------|
| <b>Total N</b>                                             | 687,155        | 844,448        | 350           | 3,388         | 658,536        | 1,129         | 3,030         | 120,426        | 16,535         | 9          | 475,049        | 1,535,341        |
| <b>Mean age (SD)</b>                                       | 14.4 (1.8)     | 14.6 (1.8)     | 15.9 (1.6)    | 16.6 (0.7)    | 14.7 (1.8)     | 16.5 (1.1)    | 16.6 (0.6)    | 16.0 (1.1)     | 17.0 (0.2)     | 16.4 (0.7) | 15.5 (1.9)     | 15.2 (2.0)       |
| <b>Sex, N (%)</b>                                          |                |                |               |               |                |               |               |                |                |            |                |                  |
| Female                                                     | 332,851 (48.4) | 423,823 (50.2) | 178 (50.9)    | 1,826 (53.9)  | 333,222 (50.6) | 582 (51.6)    | 1,655 (54.6)  | 62,875 (52.2)  | 9,166 (55.4)   | 5 (55.6)   | 248,201 (52.2) | 758,678 (49.4)   |
| Male                                                       | 354,304 (51.6) | 420,625 (49.8) | 172 (49.1)    | 1,562 (46.1)  | 325,314 (49.4) | 547 (48.4)    | 1,375 (45.4)  | 57,551 (47.8)  | 7,369 (44.6)   | <5         | 226,848 (47.8) | 776,663 (50.6)   |
| <b>Ethnicity, N (%)</b>                                    |                |                |               |               |                |               |               |                |                |            |                |                  |
| White                                                      | 343,722 (50.0) | 475,573 (56.3) | 171 (48.9)    | 1,764 (52.1)  | 372,890 (56.6) | 517 (45.8)    | 1,590 (52.5)  | 60,310 (50.1)  | 7,596 (45.9)   | <5         | 284,803 (60.0) | 821,230 (53.5)   |
| Indian                                                     | 16,139 (2.3)   | 25,223 (3.0)   | 6 (1.7)       | 60 (1.8)      | 20,982 (3.2)   | 25 (2.2)      | 54 (1.8)      | 3,188 (2.6)    | 346 (2.1)      | 0          | 11,109 (2.3)   | 41,428 (2.7)     |
| Pakistani                                                  | 26,261 (3.8)   | 20,630 (2.4)   | 9 (2.6)       | 74 (2.2)      | 13,597 (2.1)   | 42 (3.7)      | 64 (2.1)      | 1,138 (0.9)    | 143 (0.9)      | 0          | 9,633 (2.0)    | 46,974 (3.1)     |
| Bangladeshi                                                | 14,262 (2.1)   | 13,598 (1.6)   | 5 (1.4)       | 34 (1.0)      | 8,760 (1.3)    | 26 (2.3)      | 30 (1.0)      | 760 (0.6)      | 102 (0.6)      | 0          | 5,492 (1.2)    | 27,899 (1.8)     |
| Other Asian                                                | 16,108 (2.3)   | 18,126 (2.1)   | 7 (2.0)       | 35 (1.0)      | 13,271 (2.0)   | 23 (2.0)      | 32 (1.1)      | 1,658 (1.4)    | 227 (1.4)      | 0          | 7,956 (1.7)    | 34,276 (2.2)     |
| Black Caribbean                                            | 10,530 (1.5)   | 2,124 (0.3)    | <5            | 16 (0.5)      | 1,373 (0.2)    | 1 (0.1)       | 14 (0.5)      | 160 (0.1)      | 24 (0.1)       | 0          | 2,444 (0.5)    | 12,670 (0.8)     |
| Black African                                              | 44,438 (6.5)   | 17,636 (2.1)   | 11 (3.1)      | 64 (1.9)      | 10,742 (1.6)   | 40 (3.5)      | 53 (1.7)      | 873 (0.7)      | 122 (0.7)      | <5         | 9,374 (2.0)    | 62,149 (4.0)     |
| Chinese                                                    | 3,527 (0.5)    | 5,004 (0.6)    | <5            | 5 (0.1)       | 4,047 (0.6)    | 6 (0.5)       | 5 (0.2)       | 602 (0.5)      | 72 (0.4)       | 0          | 1,703 (0.4)    | 8,538 (0.6)      |
| Other                                                      | 63,421 (9.2)   | 36,451 (4.3)   | 24 (6.9)      | 129 (3.8)     | 26,200 (4.0)   | 54 (4.8)      | 118 (3.9)     | 3,374 (2.8)    | 412 (2.5)      | <5         | 22,676 (4.8)   | 100,025 (6.5)    |
| Missing                                                    | 148,747 (21.6) | 230,083 (27.2) | 115 (32.9)    | 1,207 (35.6)  | 186,674 (28.3) | 395 (35.0)    | 1,070 (35.3)  | 48,363 (40.2)  | 7,491 (45.3)   | <5         | 119,859 (25.2) | 380,152 (24.8)   |
| <b>Positive SARS-CoV-2 test during study period, N (%)</b> |                |                |               |               |                |               |               |                |                |            |                |                  |
| None                                                       | 542,510 (79.0) | 515,477 (61.0) | 211 (60.3)    | 2,094 (61.8)  | 405,137 (61.5) | 661 (58.5)    | 1,872 (61.8)  | 78,763 (65.4)  | 10,274 (62.1)  | 7 (77.8)   | 0              | 1,060,292 (69.1) |
| Prior to first vaccine dose                                | 144,645 (21.0) | 172,464 (20.4) | 92 (26.3)     | 167 (4.9)     | 129,976 (19.7) | 233 (20.6)    | 142 (4.7)     | 14,372 (11.9)  | 1,817 (11.0)   | <5         | 317,368 (66.8) | 317,368 (20.7)   |
| After first vaccine dose                                   | 0              | 156,507 (18.5) | 47 (13.4)     | 1,127 (33.3)  | 123,423 (18.7) | 235 (20.8)    | 1,016 (33.5)  | 27,291 (22.7)  | 4,444 (26.9)   | <5         | 157,681 (33.2) | 157,681 (10.3)   |
| <b>Vaccine doses received, N (%)</b>                       |                |                |               |               |                |               |               |                |                |            |                |                  |
| No vaccine                                                 | 687,155 (100)  | -              | -             | -             | -              | -             | -             | -              | -              | -          | 144,645 (30.4) | 687,155 (44.8)   |
| Dose 1                                                     | -              | 844,448 (100)  | 350 (100)     | 3,388 (100)   | 658,536 (100)  | 1,129 (100)   | 3,030 (100)   | 120,426 (100)  | 16,535 (100)   | 9 (100)    | 330,404 (69.6) | 848,186 (55.2)   |
| Dose 2                                                     | -              | 659,227 (78.1) | 228 (65.1)    | 3,240 (95.6)  | 658,536 (100)  | 1,129 (100)   | 3,030 (100)   | 120,426 (100)  | 16,535 (100)   | 9 (100)    | 255,025 (53.7) | 662,695 (43.2)   |
| Dose 3                                                     | -              | 134,571 (15.9) | 73 (20.9)     | 2,326 (68.7)  | 134,580 (20.4) | 151 (13.4)    | 2,239 (73.9)  | 120,426 (100)  | 16,535 (100)   | 9 (100)    | 47,926 (10.1)  | 136,970 (8.9)    |
| <b>Any comorbidity, N (%)</b>                              |                |                |               |               |                |               |               |                |                |            |                |                  |
| No                                                         | 581,105 (84.6) | 663,093 (78.5) | 257 (73.4)    | 1,286 (38.0)  | 515,829 (78.3) | 862 (76.4)    | 1,097 (36.2)  | 82,717 (68.7)  | 11,964 (72.4)  | <5         | 375,710 (79.1) | 1,245,741 (81.1) |
| Yes                                                        | 106,050 (15.4) | 181,355 (21.5) | 93 (26.6)     | 2,102 (62.0)  | 142,707 (21.7) | 267 (23.6)    | 1,933 (63.8)  | 37,709 (31.3)  | 4,571 (27.6)   | 5 (55.6)   | 99,339 (20.9)  | 289,600 (18.9)   |
| <b>18-24 years</b>                                         |                |                |               |               |                |               |               |                |                |            |                |                  |
| <b>Total N</b>                                             | 570,619        | 750,317        | 91,396        | 130,054       | 690,349        | 82,680        | 123,985       | 371,944        | 187,852        | 446        | 405,584        | 1,542,386        |
| <b>Mean age (SD)</b>                                       | 21.3 (2.0)     | 20.3 (1.6)     | 20.3 (1.7)    | 20.4 (1.5)    | 20.2 (1.6)     | 20.3 (1.6)    | 20.4 (1.5)    | 20.3 (1.6)     | 20.3 (1.6)     | 20.4 (1.5) | 21.8 (1.7)     | 21.6 (1.8)       |
| <b>Sex, N (%)</b>                                          |                |                |               |               |                |               |               |                |                |            |                |                  |
| Female                                                     | 261,785 (45.9) | 392,093 (52.3) | 44,350 (48.5) | 78,453 (60.3) | 364,386 (52.8) | 40,735 (49.3) | 74,855 (60.4) | 210,441 (56.6) | 102,264 (54.4) | 283 (63.5) | 236,192 (58.2) | 776,681 (50.4)   |
| Male                                                       | 308,834 (54.1) | 358,224 (47.7) | 47,046 (51.5) | 51,601 (39.7) | 325,963 (47.2) | 41,945 (50.7) | 49,130 (39.6) | 161,503 (43.4) | 85,588 (45.6)  | 163 (36.5) | 169,392 (41.8) | 765,705 (49.6)   |



|                                                            |                |                |               |                |                |               |               |                |                |            |                |                  |
|------------------------------------------------------------|----------------|----------------|---------------|----------------|----------------|---------------|---------------|----------------|----------------|------------|----------------|------------------|
| <b>Ethnicity, N (%)</b>                                    |                |                |               |                |                |               |               |                |                |            |                |                  |
| White                                                      | 191,698 (33.6) | 347,144 (46.3) | 42,554 (46.6) | 65,080 (50.0)  | 323,501 (46.9) | 38,918 (47.1) | 62,134 (50.1) | 186,469 (50.1) | 96,887 (51.6)  | 221 (49.6) | 193,960 (47.8) | 646,476 (41.9)   |
| Indian                                                     | 9,042 (1.6)    | 15,363 (2.0)   | 1,185 (1.3)   | 3,145 (2.4)    | 14,476 (2.1)   | 1,073 (1.3)   | 3,061 (2.5)   | 8,428 (2.3)    | 3,550 (1.9)    | 14 (3.1)   | 6,422 (1.6)    | 28,735 (1.9)     |
| Pakistani                                                  | 12,240 (2.1)   | 16,366 (2.2)   | 1,399 (1.5)   | 3,089 (2.4)    | 13,860 (2.0)   | 1,260 (1.5)   | 2,881 (2.3)   | 4,534 (1.2)    | 1,656 (0.9)    | 10 (2.2)   | 6,821 (1.7)    | 33,094 (2.1)     |
| Bangladeshi                                                | 7,399 (1.3)    | 10,823 (1.4)   | 1,207 (1.3)   | 2,066 (1.6)    | 9,474 (1.4)    | 997 (1.2)     | 1,936 (1.6)   | 3,069 (0.8)    | 1,460 (0.8)    | 5 (1.1)    | 4,902 (1.2)    | 21,495 (1.4)     |
| Other Asian                                                | 10,679 (1.9)   | 12,632 (1.7)   | 1,236 (1.4)   | 1,811 (1.4)    | 11,526 (1.7)   | 1,080 (1.3)   | 1,761 (1.4)   | 5,399 (1.5)    | 2,425 (1.3)    | 6 (1.3)    | 5,404 (1.3)    | 26,358 (1.7)     |
| Black Caribbean                                            | 8,993 (1.6)    | 3,211 (0.4)    | 348 (0.4)     | 425 (0.3)      | 2,601 (0.4)    | 284 (0.3)     | 389 (0.3)     | 691 (0.2)      | 373 (0.2)      | 0          | 2,915 (0.7)    | 12,977 (0.8)     |
| Black African                                              | 27,460 (4.8)   | 16,312 (2.2)   | 2,130 (2.3)   | 2,019 (1.6)    | 13,422 (1.9)   | 1,675 (2.0)   | 1,858 (1.5)   | 3,357 (0.9)    | 1,617 (0.9)    | 10 (2.2)   | 8,450 (2.1)    | 47,921 (3.1)     |
| Chinese                                                    | 10,799 (1.9)   | 3,491 (0.5)    | 428 (0.5)     | 293 (0.2)      | 3,211 (0.5)    | 361 (0.4)     | 288 (0.2)     | 1,956 (0.5)    | 903 (0.5)      | 0          | 1,212 (0.3)    | 15,011 (1.0)     |
| Other                                                      | 43,469 (7.6)   | 28,111 (3.7)   | 3,458 (3.8)   | 4,160 (3.2)    | 24,841 (3.6)   | 2,910 (3.5)   | 3,909 (3.2)   | 10,624 (2.9)   | 5,269 (2.8)    | 18 (4.0)   | 16,386 (4.0)   | 79,198 (5.1)     |
| Missing                                                    | 248,840 (43.6) | 296,864 (39.6) | 37,451 (41.0) | 47,966 (36.9)  | 273,437 (39.6) | 34,122 (41.3) | 45,768 (36.9) | 147,417 (39.6) | 73,712 (39.2)  | 162 (36.3) | 159,112 (39.2) | 631,121 (40.9)   |
| <b>Positive SARS-CoV-2 test during study period, N (%)</b> |                |                |               |                |                |               |               |                |                |            |                |                  |
| None                                                       | 498,525 (87.4) | 497,699 (66.3) | 61,602 (67.4) | 78,976 (60.7)  | 456,348 (66.1) | 55,466 (67.1) | 75,075 (60.6) | 243,244 (65.4) | 124,435 (66.2) | 264 (59.2) | 0              | 1,136,802 (73.7) |
| Prior to first vaccine dose                                | 72,094 (12.6)  | 69,928 (9.3)   | 10,512 (11.5) | 7,985 (6.1)    | 59,824 (8.7)   | 8,901 (10.8)  | 7,608 (6.1)   | 23,595 (6.3)   | 13,006 (6.9)   | 32 (7.2)   | 160,519 (39.6) | 160,519 (10.4)   |
| After first vaccine dose                                   | 0              | 182,690 (24.3) | 19,282 (21.1) | 43,093 (33.1)  | 174,177 (25.2) | 18,313 (22.1) | 41,302 (33.3) | 105,105 (28.3) | 50,411 (26.8)  | 150 (33.6) | 245,065 (60.4) | 245,065 (15.9)   |
| <b>Vaccine doses received, N (%)</b>                       |                |                |               |                |                |               |               |                |                |            |                |                  |
| No vaccine                                                 | 570,619 (100)  | -              | -             | -              | -              | -             | -             | -              | -              | -          | 72,094 (17.8)  | 570,619 (37.0)   |
| Dose 1                                                     | -              | 750,317 (100)  | 91,396 (100)  | 130,054 (100)  | 690,349 (100)  | 82,680 (100)  | 123,985 (100) | 371,944 (100)  | 187,852 (100)  | 446 (100)  | 333,490 (82.2) | 971,767 (63.0)   |
| Dose 2                                                     | -              | 689,601 (91.9) | 80,872 (88.5) | 126,541 (97.3) | 690,349 (100)  | 82,680 (100)  | 123,985 (100) | 371,944 (100)  | 187,852 (100)  | 446 (100)  | 310,125 (76.5) | 897,014 (58.2)   |
| Dose 3                                                     | -              | 421,862 (56.2) | 45,307 (49.6) | 93,073 (71.6)  | 422,351 (61.2) | 45,300 (54.8) | 92,586 (74.7) | 371,944 (100)  | 187,852 (100)  | 446 (100)  | 192,299 (47.4) | 560,242 (36.3)   |
| <b>Any comorbidity, N (%)</b>                              |                |                |               |                |                |               |               |                |                |            |                |                  |
| No                                                         | 451,013 (79.0) | 509,397 (67.9) | 63,175 (69.1) | 60,032 (46.2)  | 468,518 (67.9) | 57,211 (69.2) | 57,223 (46.2) | 235,370 (63.3) | 122,195 (65.0) | 208 (46.6) | 261,611 (64.5) | 1,083,617 (70.3) |
| Yes                                                        | 119,606 (21.0) | 240,920 (32.1) | 28,221 (30.9) | 70,022 (53.8)  | 221,831 (32.1) | 25,469 (30.8) | 66,762 (53.8) | 136,574 (36.7) | 65,657 (35.0)  | 238 (53.4) | 143,973 (35.5) | 458,769 (29.7)   |

**Supplementary Table 11.** Incidence rates of individual outcomes (events per 100,000 person-years) in the 1-42 days following vaccination or a SARS-CoV-2 positive test (before or after vaccination) in young people aged 5-11, 12-17 and 18-24 years included in QResearch primary care database in England between 8<sup>th</sup> December 2020 until 7<sup>th</sup> August 2022. Cells with a hyphen are suppressed; N – number of events; IR – incidence rate; CI – confidence interval.

|                                              | BNT162b2 vaccine |                         | mRNA-1273 vaccine |                         | ChAdOX1 vaccine |                         | Positive SARS-CoV-2 test |                          |
|----------------------------------------------|------------------|-------------------------|-------------------|-------------------------|-----------------|-------------------------|--------------------------|--------------------------|
|                                              | N                | Incidence rate (95% CI) | N                 | Incidence rate (95% CI) | N               | Incidence rate (95% CI) | N                        | Incidence rate (95% CI)  |
| <b>5-11 years</b>                            |                  |                         |                   |                         |                 |                         |                          |                          |
| <b>Multisystem inflammatory syndrome</b>     |                  |                         |                   |                         |                 |                         |                          |                          |
| First dose/positive test (before vaccine)    | 0                | -                       | 0                 | -                       | 0               | -                       | 68                       | 75,218 (59,306, 95,399)  |
| Second dose/positive test (after vaccine)    | 0                | -                       | 0                 | -                       | 0               | -                       | 0                        | -                        |
| Third dose                                   | 0                | -                       | 0                 | -                       | 0               | -                       |                          |                          |
| <b>Myocarditis</b>                           |                  |                         |                   |                         |                 |                         |                          |                          |
| First dose/positive test (before vaccine)    | 0                | -                       | 0                 | -                       | 0               | -                       | <5                       | -                        |
| Second dose/positive test (after vaccine)    | 0                | -                       | 0                 | -                       | 0               | -                       | 0                        | -                        |
| Third dose                                   | 0                | -                       | 0                 | -                       | 0               | -                       |                          |                          |
| <b>Immune or idiopathic thrombocytopenia</b> |                  |                         |                   |                         |                 |                         |                          |                          |
| First dose/positive test (before vaccine)    | <5               | -                       | 0                 | -                       | 0               | -                       | 14                       | 27,418 (16,239, 46,295)  |
| Second dose/positive test (after vaccine)    | 0                | -                       | 0                 | -                       | 0               | -                       | <5                       | -                        |
| Third dose                                   | 0                | -                       | 0                 | -                       | 0               | -                       |                          |                          |
| <b>Epilepsy</b>                              |                  |                         |                   |                         |                 |                         |                          |                          |
| First dose/positive test (before vaccine)    | 18               | 10 (7, 17)              | 0                 | -                       | 0               | -                       | 27                       | 15,666 (10,743, 22,844)  |
| Second dose/positive test (after vaccine)    | 7                | 21 (10, 43)             | 0                 | -                       | 0               | -                       | <5                       | -                        |
| Third dose                                   | 0                | -                       | 0                 | -                       | 0               | -                       |                          |                          |
| <b>Acute pancreatitis</b>                    |                  |                         |                   |                         |                 |                         |                          |                          |
| First dose/positive test (before vaccine)    | 0                | -                       | 0                 | -                       | 0               | -                       | <5                       | -                        |
| Second dose/positive test (after vaccine)    | 0                | -                       | 0                 | -                       | 0               | -                       | 0                        | -                        |
| Third dose                                   | 0                | -                       | 0                 | -                       | 0               | -                       |                          |                          |
| <b>Myositis</b>                              |                  |                         |                   |                         |                 |                         |                          |                          |
| First dose/positive test (before vaccine)    | 0                | -                       | 0                 | -                       | 0               | -                       | 5                        | 41,983 (17,474, 100,865) |
| Second dose/positive test (after vaccine)    | 0                | -                       | 0                 | -                       | 0               | -                       | 0                        | -                        |
| Third dose                                   | 0                | -                       | 0                 | -                       | 0               | -                       |                          |                          |
| <b>Acute disseminated encephalomyelitis</b>  |                  |                         |                   |                         |                 |                         |                          |                          |
| First dose/positive test (before vaccine)    | 0                | -                       | 0                 | -                       | 0               | -                       | <5                       | -                        |
| Second dose/positive test (after vaccine)    | 0                | -                       | 0                 | -                       | 0               | -                       | 0                        | -                        |
| Third dose                                   | 0                | -                       | 0                 | -                       | 0               | -                       |                          |                          |
| <b>Demyelinating disease</b>                 |                  |                         |                   |                         |                 |                         |                          |                          |
| First dose/positive test (before vaccine)    | <5               | -                       | 0                 | -                       | 0               | -                       | <5                       | -                        |
| Second dose/positive test (after vaccine)    | 0                | -                       | 0                 | -                       | 0               | -                       | 0                        | -                        |
| Third dose                                   | 0                | -                       | 0                 | -                       | 0               | -                       |                          |                          |

|                                              |    |            |    |   |    |               |    |                          |
|----------------------------------------------|----|------------|----|---|----|---------------|----|--------------------------|
| <b>Appendicitis</b>                          |    |            |    |   |    |               |    |                          |
| First dose/positive test (before vaccine)    | 18 | 10 (7, 16) | 0  | - | 0  | -             | 67 | 19,230 (15,135, 24,432)  |
| Second dose/positive test (after vaccine)    | <5 | -          | 0  | - | 0  | -             | 0  | -                        |
| Third dose                                   | 0  | -          | 0  | - | 0  | -             |    |                          |
| <b>Guillain-Barre syndrome</b>               |    |            |    |   |    |               |    |                          |
| First dose/positive test (before vaccine)    | 0  | -          | 0  | - | 0  | -             | 0  | -                        |
| Second dose/positive test (after vaccine)    | 0  | -          | 0  | - | 0  | -             | 0  | -                        |
| Third dose                                   | 0  | -          | 0  | - | 0  | -             |    |                          |
| <b>Angioedema</b>                            |    |            |    |   |    |               |    |                          |
| First dose/positive test (before vaccine)    | 0  | -          | 0  | - | 0  | -             | <5 | -                        |
| Second dose/positive test (after vaccine)    | 0  | -          | 0  | - | 0  | -             | 0  | -                        |
| Third dose                                   | 0  | -          | 0  | - | 0  | -             |    |                          |
| <b>Anaphylaxis</b>                           |    |            |    |   |    |               |    |                          |
| First dose/positive test (before vaccine)    | <5 | -          | 0  | - | 0  | -             | 9  | 35,848 (18,652, 68,897)  |
| Second dose/positive test (after vaccine)    | 0  | -          | 0  | - | 0  | -             | 0  | -                        |
| Third dose                                   | 0  | -          | 0  | - | 0  | -             |    |                          |
| <b>12-17 years</b>                           |    |            |    |   |    |               |    |                          |
| <b>Multisystem inflammatory syndrome</b>     |    |            |    |   |    |               |    |                          |
| First dose/positive test (before vaccine)    | 6  | 1 (0, 1)   | 0  | - | 0  | -             | 37 | 86,519 (62,687, 119,412) |
| Second dose/positive test (after vaccine)    | 0  | -          | 0  | - | 0  | -             | <5 | -                        |
| Third dose                                   | 0  | -          | 0  | - | 0  | -             |    |                          |
| <b>Myocarditis</b>                           |    |            |    |   |    |               |    |                          |
| First dose/positive test (before vaccine)    | 8  | 1 (0, 2)   | 0  | - | 0  | -             | 5  | 37,423 (15,577, 89,910)  |
| Second dose/positive test (after vaccine)    | 9  | 1 (1, 2)   | 0  | - | 0  | -             | <5 | -                        |
| Third dose                                   | <5 | -          | <5 | - | 0  | -             |    |                          |
| <b>Immune or idiopathic thrombocytopenia</b> |    |            |    |   |    |               |    |                          |
| First dose/positive test (before vaccine)    | 12 | 1 (1, 2)   | 0  | - | 0  | -             | 15 | 26,040 (15,698, 43,193)  |
| Second dose/positive test (after vaccine)    | 11 | 2 (1, 3)   | 0  | - | 0  | -             | 5  | 39,788 (16,561, 95,591)  |
| Third dose                                   | <5 | -          | 0  | - | 0  | -             |    |                          |
| <b>Epilepsy</b>                              |    |            |    |   |    |               |    |                          |
| First dose/positive test (before vaccine)    | 60 | 6 (5, 8)   | 0  | - | 5  | 129 (54, 311) | 18 | 10,305 (6492, 16,356)    |
| Second dose/positive test (after vaccine)    | 54 | 7 (6, 10)  | <5 | - | <5 | -             | 23 | 33,035 (21,952, 49,712)  |
| Third dose                                   | 11 | 9 (5, 16)  | <5 | - | 0  | -             |    |                          |
| <b>Acute pancreatitis</b>                    |    |            |    |   |    |               |    |                          |
| First dose/positive test (before vaccine)    | 8  | 1 (0, 2)   | 0  | - | 0  | -             | <5 | -                        |
| Second dose/positive test (after vaccine)    | <5 | -          | 0  | - | 0  | -             | <5 | -                        |
| Third dose                                   | <5 | -          | 0  | - | 0  | -             |    |                          |
| <b>Myositis</b>                              |    |            |    |   |    |               |    |                          |
| First dose/positive test (before vaccine)    | <5 | -          | 0  | - | 0  | -             | <5 | -                        |
| Second dose/positive test (after vaccine)    | 0  | -          | 0  | - | 0  | -             | 0  | -                        |

|                                              |     |             |    |            |    |             |    |                         |
|----------------------------------------------|-----|-------------|----|------------|----|-------------|----|-------------------------|
| Third dose                                   | 0   | -           | 0  | -          | 0  | -           |    |                         |
| <b>Acute disseminated encephalomyelitis</b>  |     |             |    |            |    |             |    |                         |
| First dose/positive test (before vaccine)    | <5  | -           | 0  | -          | 0  | -           | <5 | -                       |
| Second dose/positive test (after vaccine)    | <5  | -           | 0  | -          | 0  | -           | <5 | -                       |
| Third dose                                   | 0   | -           | 0  | -          | 0  | -           |    |                         |
| <b>Demyelinating disease</b>                 |     |             |    |            |    |             |    |                         |
| First dose/positive test (before vaccine)    | <5  | -           | 0  | -          | 0  | -           | <5 | -                       |
| Second dose/positive test (after vaccine)    | <5  | -           | 0  | -          | 0  | -           | 0  | -                       |
| Third dose                                   | <5  | -           | 0  | -          | 0  | -           |    |                         |
| <b>Appendicitis</b>                          |     |             |    |            |    |             |    |                         |
| First dose/positive test (before vaccine)    | 141 | 15 (12, 17) | 0  | -          | 0  | -           | 67 | 13,305 (10,472, 16,905) |
| Second dose/positive test (after vaccine)    | 99  | 14 (11, 17) | 0  | -          | 0  | -           | 28 | 19,264 (13,301, 27,900) |
| Third dose                                   | 25  | 20 (14, 30) | <5 | -          | 0  | -           |    |                         |
| <b>Guillain-Barre syndrome</b>               |     |             |    |            |    |             |    |                         |
| First dose/positive test (before vaccine)    | 0   | -           | 0  | -          | 0  | -           | <5 | -                       |
| Second dose/positive test (after vaccine)    | 0   | -           | 0  | -          | 0  | -           | 0  | -                       |
| Third dose                                   | 0   | -           | 0  | -          | 0  | -           |    |                         |
| <b>Angioedema</b>                            |     |             |    |            |    |             |    |                         |
| First dose/positive test (before vaccine)    | 8   | 1 (0, 2)    | 0  | -          | 0  | -           | <5 | -                       |
| Second dose/positive test (after vaccine)    | <5  | -           | 0  | -          | <5 | -           | 0  | -                       |
| Third dose                                   | <5  | -           | 0  | -          | 0  | -           |    |                         |
| <b>Anaphylaxis</b>                           |     |             |    |            |    |             |    |                         |
| First dose/positive test (before vaccine)    | 16  | 2 (1, 3)    | 0  | -          | 0  | -           | 6  | 11,744 (5276, 26,142)   |
| Second dose/positive test (after vaccine)    | 5   | 1 (0, 2)    | 0  | -          | 0  | -           | <5 | -                       |
| Third dose                                   | <5  | -           | 0  | -          | 0  | -           |    |                         |
| <b>18-24 years</b>                           |     |             |    |            |    |             |    |                         |
| <b>Multisystem inflammatory syndrome</b>     |     |             |    |            |    |             |    |                         |
| First dose/positive test (before vaccine)    | <5  | -           | 0  | -          | 0  | -           | <5 | -                       |
| Second dose/positive test (after vaccine)    | <5  | -           | 0  | -          | <5 | -           | <5 | -                       |
| Third dose                                   | 0   | -           | 0  | -          | 0  | -           |    |                         |
| <b>Myocarditis</b>                           |     |             |    |            |    |             |    |                         |
| First dose/positive test (before vaccine)    | 9   | 1 (0, 2)    | <5 | -          | 0  | -           | 8  | 24,637 (12,321, 49,265) |
| Second dose/positive test (after vaccine)    | 14  | 2 (1, 3)    | 12 | 13 (7, 23) | <5 | -           | 7  | 39,887 (19,015, 83,667) |
| Third dose                                   | 6   | 1 (1, 3)    | <5 | -          | 0  | -           |    |                         |
| <b>Immune or idiopathic thrombocytopenia</b> |     |             |    |            |    |             |    |                         |
| First dose/positive test (before vaccine)    | 16  | 2 (1, 3)    | <5 | -          | 14 | 9 (6, 16)   | 16 | 28,287 (17,329, 46,172) |
| Second dose/positive test (after vaccine)    | 18  | 2 (1, 4)    | 0  | -          | <5 | -           | 7  | 20,069 (9567, 42,096)   |
| Third dose                                   | 5   | 1 (0, 3)    | 0  | -          | 0  | -           |    |                         |
| <b>Epilepsy</b>                              |     |             |    |            |    |             |    |                         |
| First dose/positive test (before vaccine)    | 45  | 5 (4, 7)    | <5 | -          | 59 | 40 (31, 51) | 20 | 11,132 (7182, 17,255)   |

|                                             |     |             |    |             |    |             |    |                         |
|---------------------------------------------|-----|-------------|----|-------------|----|-------------|----|-------------------------|
| Second dose/positive test (after vaccine)   | 48  | 6 (5, 8)    | <5 | -           | 60 | 42 (33, 54) | 38 | 26,794 (19,497, 36,824) |
| Third dose                                  | 44  | 10 (8, 14)  | 10 | 5 (3, 9)    | <5 | -           |    |                         |
| <b>Acute pancreatitis</b>                   |     |             |    |             |    |             |    |                         |
| First dose/positive test (before vaccine)   | 22  | 3 (2, 4)    | 5  | 5 (2, 11)   | <5 | -           | 8  | 23,283 (11,644, 46,557) |
| Second dose/positive test (after vaccine)   | 17  | 2 (1, 3)    | <5 | -           | 9  | 6 (3, 12)   | 5  | 9840 (4096, 23,640)     |
| Third dose                                  | 9   | 2 (1, 4)    | <5 | -           | 0  | -           |    |                         |
| <b>Myositis</b>                             |     |             |    |             |    |             |    |                         |
| First dose/positive test (before vaccine)   | <5  | -           | 0  | -           | <5 | -           | <5 | -                       |
| Second dose/positive test (after vaccine)   | 0   | -           | 0  | -           | <5 | -           | <5 | -                       |
| Third dose                                  | 0   | -           | 0  | -           | 0  | -           |    |                         |
| <b>Acute disseminated encephalomyelitis</b> |     |             |    |             |    |             |    |                         |
| First dose/positive test (before vaccine)   | 7   | 1 (0, 2)    | 0  | -           | 0  | -           | <5 | -                       |
| Second dose/positive test (after vaccine)   | <5  | -           | 0  | -           | <5 | -           | <5 | -                       |
| Third dose                                  | 0   | -           | <5 | -           | 0  | -           |    |                         |
| <b>Demyelinating disease</b>                |     |             |    |             |    |             |    |                         |
| First dose/positive test (before vaccine)   | <5  | -           | 0  | -           | 0  | -           | <5 | -                       |
| Second dose/positive test (after vaccine)   | 5   | 1 (0, 2)    | 0  | -           | 0  | -           | <5 | -                       |
| Third dose                                  | <5  | -           | 0  | -           | 0  | -           |    |                         |
| <b>Appendicitis</b>                         |     |             |    |             |    |             |    |                         |
| First dose/positive test (before vaccine)   | 141 | 16 (14, 19) | 20 | 19 (12, 30) | 34 | 23 (16, 32) | 33 | 11,445 (8137, 16,099)   |
| Second dose/positive test (after vaccine)   | 121 | 15 (13, 18) | 14 | 15 (9, 25)  | 29 | 20 (14, 29) | 58 | 25,527 (19,734, 33,019) |
| Third dose                                  | 64  | 15 (12, 19) | 26 | 13 (9, 18)  | 0  | -           |    |                         |
| <b>Guillain-Barre syndrome</b>              |     |             |    |             |    |             |    |                         |
| First dose/positive test (before vaccine)   | 0   | -           | 0  | -           | 0  | -           | 0  | -                       |
| Second dose/positive test (after vaccine)   | <5  | -           | 0  | -           | 0  | -           | 0  | -                       |
| Third dose                                  | 0   | -           | 0  | -           | 0  | -           |    |                         |
| <b>Angioedema</b>                           |     |             |    |             |    |             |    |                         |
| First dose/positive test (before vaccine)   | 8   | 1 (0, 2)    | <5 | -           | <5 | -           | <5 | -                       |
| Second dose/positive test (after vaccine)   | 7   | 1 (0, 2)    | 0  | -           | <5 | -           | <5 | -                       |
| Third dose                                  | <5  | -           | <5 | -           | 0  | -           |    |                         |
| <b>Anaphylaxis</b>                          |     |             |    |             |    |             |    |                         |
| First dose/positive test (before vaccine)   | 8   | 1 (0, 2)    | 0  | -           | 7  | 5 (2, 10)   | <5 | -                       |
| Second dose/positive test (after vaccine)   | 9   | 1 (0, 2)    | <5 | -           | 6  | 4 (2, 9)    | <5 | -                       |
| Third dose                                  | 7   | 2 (1, 3)    | <5 | -           | 0  | -           |    |                         |

**Supplementary Table 12.** Characteristics of matched vaccinated and unvaccinated young people aged 5-11, 12-17 and 18-24 years included in matched cohort study included in QResearch primary care database in England between 8<sup>th</sup> December 2020 until 7<sup>th</sup> August 2022. Cells with <5 are suppressed. Data are presented as counts (column %).

|                            | Dose 1                     |                      | Dose 2                      |                      | Dose 3                     |                      |
|----------------------------|----------------------------|----------------------|-----------------------------|----------------------|----------------------------|----------------------|
|                            | Vaccinated with first dose | Matched unvaccinated | Vaccinated with second dose | Matched unvaccinated | Vaccinated with third dose | Matched unvaccinated |
| <b>5-11 years</b>          |                            |                      |                             |                      |                            |                      |
| <b>Total N</b>             | 160,262                    | 160,262              | 78,374                      | 78,374               | 200                        | 200                  |
| <b>Mean age (SD)</b>       | 8.7 (2.0)                  | 8.7 (2.0)            | 8.8 (1.9)                   | 8.8 (1.9)            | 10.0 (1.7)                 | 10.0 (1.7)           |
| <b>Sex, N (%)</b>          |                            |                      |                             |                      |                            |                      |
| Female                     | 77,942 (48.6)              | 77,942 (48.6)        | 38,028 (48.5)               | 38,028 (48.5)        | 82 (41.0)                  | 82 (41.0)            |
| Male                       | 82,320 (51.4)              | 82,320 (51.4)        | 40,346 (51.5)               | 40,346 (51.5)        | 118 (59.0)                 | 118 (59.0)           |
| <b>Ethnicity, N (%)</b>    |                            |                      |                             |                      |                            |                      |
| White                      | 90,655 (56.6)              | 83,113 (51.9)        | 44,946 (57.3)               | 40,553 (51.7)        | 141 (70.5)                 | 108 (54.0)           |
| Indian                     | 8,730 (5.4)                | 4,196 (2.6)          | 4,413 (5.6)                 | 1,959 (2.5)          | <5                         | <5                   |
| Pakistani                  | 2,469 (1.5)                | 4,909 (3.1)          | 959 (1.2)                   | 2,426 (3.1)          | <5                         | <5                   |
| Bangladeshi                | 2,346 (1.5)                | 2,790 (1.7)          | 1,064 (1.4)                 | 1,448 (1.8)          | <5                         | <5                   |
| Other Asian                | 3,446 (2.2)                | 3,270 (2.0)          | 1,595 (2.0)                 | 1,585 (2.0)          | <5                         | <5                   |
| Black Caribbean            | 176 (0.1)                  | 1,086 (0.7)          | 83 (0.1)                    | 574 (0.7)            | <5                         | <5                   |
| Black African              | 1,977 (1.2)                | 5,810 (3.6)          | 859 (1.1)                   | 3,018 (3.9)          | <5                         | 12 (6.0)             |
| Chinese                    | 1,628 (1.0)                | 861 (0.5)            | 896 (1.1)                   | 430 (0.5)            | <5                         | <5                   |
| Other                      | 7,374 (4.6)                | 11,098 (6.9)         | 3,567 (4.6)                 | 5,502 (7.0)          | 8 (4.0)                    | 15 (7.5)             |
| Missing                    | 41,461 (25.9)              | 43,129 (26.9)        | 19,992 (25.5)               | 20,879 (26.6)        | 45 (22.5)                  | 46 (23.0)            |
| <b>Vaccine type, N (%)</b> |                            |                      |                             |                      |                            |                      |
| BNT162b2                   | 160,208 (>99.9)            | -                    | 78,363 (>99.9)              | -                    | 200 (100.0)                | -                    |
| mRNA-1273                  | 20 (<0.1)                  | -                    | 9 (<0.1)                    | -                    | 0                          | -                    |
| ChAdOX1                    | 34 (<0.1)                  | -                    | <5                          | -                    | 0                          | -                    |
| <b>12-17 years</b>         |                            |                      |                             |                      |                            |                      |
| <b>Total N</b>             | 848,186                    | 848,186              | 480,558                     | 480,558              | 75,479                     | 75,479               |
| <b>Mean age (SD)</b>       | 14.6 (1.8)                 | 14.6 (1.8)           | 14.7 (1.8)                  | 14.7 (1.8)           | 16.1 (1.1)                 | 16.1 (1.1)           |
| <b>Sex, N (%)</b>          |                            |                      |                             |                      |                            |                      |
| Female                     | 425,827 (50.2)             | 425,827 (50.2)       | 240,656 (50.1)              | 240,656 (50.1)       | 38,166 (50.6)              | 38,166 (50.6)        |
| Male                       | 422,359 (49.8)             | 422,359 (49.8)       | 239,902 (49.9)              | 239,902 (49.9)       | 37,313 (49.4)              | 37,313 (49.4)        |
| <b>Ethnicity, N (%)</b>    |                            |                      |                             |                      |                            |                      |
| White                      | 477,508 (56.3)             | 414,906 (48.9)       | 271,443 (56.5)              | 222,149 (46.2)       | 37,423 (49.6)              | 28,771 (38.1)        |
| Indian                     | 25,289 (3.0)               | 19,447 (2.3)         | 15,095 (3.1)                | 10,216 (2.1)         | 1,964 (2.6)                | 1,327 (1.8)          |
| Pakistani                  | 20,713 (2.4)               | 28,652 (3.4)         | 10,309 (2.1)                | 17,209 (3.6)         | 717 (0.9)                  | 2,488 (3.3)          |
| Bangladeshi                | 13,637 (1.6)               | 16,552 (2.0)         | 6,553 (1.4)                 | 9,527 (2.0)          | 457 (0.6)                  | 1,398 (1.9)          |

|                            |                |                |                |                |                |                |
|----------------------------|----------------|----------------|----------------|----------------|----------------|----------------|
| Other Asian                | 18,168 (2.1)   | 18,844 (2.2)   | 9,629 (2.0)    | 10,625 (2.2)   | 1,071 (1.4)    | 1,499 (2.0)    |
| Black Caribbean            | 2,140 (0.3)    | 10,085 (1.2)   | 1,042 (0.2)    | 7,129 (1.5)    | 105 (0.1)      | 1,242 (1.6)    |
| Black African              | 17,711 (2.1)   | 43,323 (5.1)   | 8,160 (1.7)    | 28,668 (6.0)   | 556 (0.7)      | 4,614 (6.1)    |
| Chinese                    | 5,011 (0.6)    | 4,401 (0.5)    | 2,894 (0.6)    | 2,452 (0.5)    | 350 (0.5)      | 399 (0.5)      |
| Other                      | 36,604 (4.3)   | 64,112 (7.6)   | 19,336 (4.0)   | 41,044 (8.5)   | 2,084 (2.8)    | 6,335 (8.4)    |
| Missing                    | 231,405 (27.3) | 227,864 (26.9) | 136,097 (28.3) | 131,539 (27.4) | 30,752 (40.7)  | 27,406 (36.3)  |
| <b>Vaccine type, N (%)</b> |                |                |                |                |                |                |
| BNT162b2                   | 844,448 (99.6) | -              | 476,862 (99.2) | -              | 66,303 (87.8)  | -              |
| mRNA-1273                  | 350 (<0.1)     | -              | 850 (0.2)      | -              | 9,169 (12.1)   | -              |
| ChAdOX1                    | 3,388 (0.4)    | -              | 2,846 (0.6)    | -              | 7 (<0.1)       | -              |
| <b>18-24 years</b>         |                |                |                |                |                |                |
| <b>Total N</b>             | 971,767        | 971,767        | 676,841        | 676,841        | 297,405        | 297,405        |
| <b>Mean age (SD)</b>       | 20.3 (1.6)     | 20.3 (1.6)     | 20.3 (1.6)     | 20.3 (1.6)     | 20.4 (1.6)     | 20.4 (1.6)     |
| <b>Sex, N (%)</b>          |                |                |                |                |                |                |
| Female                     | 514,896 (53.0) | 514,896 (53.0) | 360,235 (53.2) | 360,235 (53.2) | 159,134 (53.5) | 159,134 (53.5) |
| Male                       | 456,871 (47.0) | 456,871 (47.0) | 316,606 (46.8) | 316,606 (46.8) | 138,271 (46.5) | 138,271 (46.5) |
| <b>Ethnicity, N (%)</b>    |                |                |                |                |                |                |
| White                      | 454,778 (46.8) | 373,409 (38.4) | 318,410 (47.0) | 245,119 (36.2) | 149,813 (50.4) | 101,020 (34.0) |
| Indian                     | 19,693 (2.0)   | 15,949 (1.6)   | 13,812 (2.0)   | 10,764 (1.6)   | 6,045 (2.0)    | 4,531 (1.5)    |
| Pakistani                  | 20,854 (2.1)   | 22,386 (2.3)   | 14,149 (2.1)   | 16,170 (2.4)   | 3,184 (1.1)    | 6,773 (2.3)    |
| Bangladeshi                | 14,096 (1.5)   | 13,905 (1.4)   | 9,643 (1.4)    | 9,579 (1.4)    | 2,382 (0.8)    | 3,757 (1.3)    |
| Other Asian                | 15,679 (1.6)   | 17,490 (1.8)   | 10,952 (1.6)   | 12,514 (1.8)   | 4,145 (1.4)    | 5,571 (1.9)    |
| Black Caribbean            | 3,984 (0.4)    | 11,099 (1.1)   | 2,640 (0.4)    | 9,137 (1.3)    | 579 (0.2)      | 4,598 (1.5)    |
| Black African              | 20,461 (2.1)   | 37,441 (3.9)   | 13,647 (2.0)   | 29,109 (4.3)   | 2,625 (0.9)    | 13,458 (4.5)   |
| Chinese                    | 4,212 (0.4)    | 13,547 (1.4)   | 2,849 (0.4)    | 11,375 (1.7)   | 1,579 (0.5)    | 6,227 (2.1)    |
| Other                      | 35,729 (3.7)   | 59,556 (6.1)   | 24,415 (3.6)   | 46,001 (6.8)   | 8,484 (2.9)    | 22,283 (7.5)   |
| Missing                    | 382,281 (39.3) | 406,985 (41.9) | 266,324 (39.3) | 287,073 (42.4) | 118,569 (39.9) | 129,187 (43.4) |
| <b>Vaccine type, N (%)</b> |                |                |                |                |                |                |
| BNT162b2                   | 750,317 (77.2) | -              | 505,781 (74.7) | -              | 194,911 (65.5) | -              |
| mRNA-1273                  | 91,396 (9.4)   | -              | 62,699 (9.3)   | -              | 102,247 (34.4) | -              |
| ChAdOX1                    | 130,054 (13.4) | -              | 108,361 (16.0) | -              | 247 (0.1)      | -              |

**Supplementary Table 13.** Incidence rate ratios (unadjusted and adjusted for ethnicity, quintile of deprivation and comorbidities) for individual outcomes in the 1-42 days following vaccination compared to matched unvaccinated group in young people aged 5-11, 12-17 and 18-24 years. Cells with a hyphen are suppressed and cells with \* are models that did not converge. N – number of events; IRR – incidence rate ratio; CI – confidence interval.

|                                              | Unvaccinated | BNT162b2 vaccine |                        | mRNA-1273 vaccine    |          |                        | ChAdOX1 vaccine      |          |                        |                      |
|----------------------------------------------|--------------|------------------|------------------------|----------------------|----------|------------------------|----------------------|----------|------------------------|----------------------|
|                                              | N events     | N events         | Unadjusted IRR (95%CI) | Adjusted IRR (95%CI) | N events | Unadjusted IRR (95%CI) | Adjusted IRR (95%CI) | N events | Unadjusted IRR (95%CI) | Adjusted IRR (95%CI) |
| <b>5-11 years</b>                            |              |                  |                        |                      |          |                        |                      |          |                        |                      |
| <b>Multisystem inflammatory syndrome</b>     |              |                  |                        |                      |          |                        |                      |          |                        |                      |
| First dose/positive test (before vaccine)    | 0            | 0                | -                      | -                    | 0        | -                      | -                    | 0        | -                      | -                    |
| Second dose/positive test (after vaccine)    | 0            | 0                | -                      | -                    | 0        | -                      | -                    | 0        | -                      | -                    |
| Third dose                                   | 0            | 0                | -                      | -                    | 0        | -                      | -                    | 0        | -                      | -                    |
| <b>Myocarditis</b>                           |              |                  |                        |                      |          |                        |                      |          |                        |                      |
| First dose/positive test (before vaccine)    | 0            | 0                | -                      | -                    | 0        | -                      | -                    | 0        | -                      | -                    |
| Second dose/positive test (after vaccine)    | 0            | 0                | -                      | -                    | 0        | -                      | -                    | 0        | -                      | -                    |
| Third dose                                   | 0            | 0                | -                      | -                    | 0        | -                      | -                    | 0        | -                      | -                    |
| <b>Immune or idiopathic thrombocytopenia</b> |              |                  |                        |                      |          |                        |                      |          |                        |                      |
| First dose/positive test (before vaccine)    | <5           | <5               | -                      | -                    | 0        | -                      | -                    | 0        | -                      | -                    |
| Second dose/positive test (after vaccine)    | 0            | 0                | -                      | -                    | 0        | -                      | -                    | 0        | -                      | -                    |
| Third dose                                   | 0            | 0                | -                      | -                    | 0        | -                      | -                    | 0        | -                      | -                    |
| <b>Epilepsy</b>                              |              |                  |                        |                      |          |                        |                      |          |                        |                      |
| First dose/positive test (before vaccine)    | <5           | 16               | 16.00 (2.12, 120.65)   | *                    | 0        | -                      | -                    | 0        | -                      | -                    |
| Second dose/positive test (after vaccine)    | <5           | 7                | 7.00 (0.86, 56.89)     | *                    | 0        | -                      | -                    | 0        | -                      | -                    |
| Third dose                                   | 0            | 0                | -                      | -                    | 0        | -                      | -                    | 0        | -                      | -                    |
| <b>Acute pancreatitis</b>                    |              |                  |                        |                      |          |                        |                      |          |                        |                      |
| First dose/positive test (before vaccine)    | 0            | 0                | -                      | -                    | 0        | -                      | -                    | 0        | -                      | -                    |
| Second dose/positive test (after vaccine)    | 0            | 0                | -                      | -                    | 0        | -                      | -                    | 0        | -                      | -                    |
| Third dose                                   | 0            | 0                | -                      | -                    | 0        | -                      | -                    | 0        | -                      | -                    |
| <b>Myositis</b>                              |              |                  |                        |                      |          |                        |                      |          |                        |                      |
| First dose/positive test (before vaccine)    | 0            | 0                | -                      | -                    | 0        | -                      | -                    | 0        | -                      | -                    |



|                                             |    |    |                   |                   |   |   |   |   |   |   |
|---------------------------------------------|----|----|-------------------|-------------------|---|---|---|---|---|---|
| Second dose/positive test (after vaccine)   | 0  | 0  | -                 | -                 | 0 | - | - | 0 | - | - |
| Third dose                                  | 0  | 0  | -                 | -                 | 0 | - | - | 0 | - | - |
| <b>Acute disseminated encephalomyelitis</b> |    |    |                   |                   |   |   |   |   |   |   |
| First dose/positive test (before vaccine)   | <5 | 0  | -                 | -                 | 0 | - | - | 0 | - | - |
| Second dose/positive test (after vaccine)   | 0  | 0  | -                 | -                 | 0 | - | - | 0 | - | - |
| Third dose                                  | 0  | 0  | -                 | -                 | 0 | - | - | 0 | - | - |
| <b>Demyelinating disease</b>                |    |    |                   |                   |   |   |   |   |   |   |
| First dose/positive test (before vaccine)   | 0  | <5 | -                 | -                 | 0 | - | - | 0 | - | - |
| Second dose/positive test (after vaccine)   | 0  | 0  | -                 | -                 | 0 | - | - | 0 | - | - |
| Third dose                                  | 0  | 0  | -                 | -                 | 0 | - | - | 0 | - | - |
| <b>Appendicitis</b>                         |    |    |                   |                   |   |   |   |   |   |   |
| First dose/positive test (before vaccine)   | 20 | 18 | 0.89 (0.47, 1.68) | 0.96 (0.45, 2.03) | 0 | - | - | 0 | - | - |
| Second dose/positive test (after vaccine)   | <5 | <5 | -                 | -                 | 0 | - | - | 0 | - | - |
| Third dose                                  | 0  | 0  | -                 | -                 | 0 | - | - | 0 | - | - |
| <b>Guillain-Barre syndrome</b>              |    |    |                   |                   |   |   |   |   |   |   |
| First dose/positive test (before vaccine)   | 0  | 0  | -                 | -                 | 0 | - | - | 0 | - | - |
| Second dose/positive test (after vaccine)   | 0  | 0  | -                 | -                 | 0 | - | - | 0 | - | - |
| Third dose                                  | 0  | 0  | -                 | -                 | 0 | - | - | 0 | - | - |
| <b>Angioedema</b>                           |    |    |                   |                   |   |   |   |   |   |   |
| First dose/positive test (before vaccine)   | 0  | 0  | -                 | -                 | 0 | - | - | 0 | - | - |
| Second dose/positive test (after vaccine)   | 0  | 0  | -                 | -                 | 0 | - | - | 0 | - | - |
| Third dose                                  | 0  | 0  | -                 | -                 | 0 | - | - | 0 | - | - |
| <b>Anaphylaxis</b>                          |    |    |                   |                   |   |   |   |   |   |   |
| First dose/positive test (before vaccine)   | 0  | <5 | -                 | -                 | 0 | - | - | 0 | - | - |
| Second dose/positive test (after vaccine)   | 0  | 0  | -                 | -                 | 0 | - | - | 0 | - | - |
| Third dose                                  | 0  | 0  | -                 | -                 | 0 | - | - | 0 | - | - |
| <b>12-17 years</b>                          |    |    |                   |                   |   |   |   |   |   |   |
| <b>Multisystem inflammatory syndrome</b>    |    |    |                   |                   |   |   |   |   |   |   |
| First dose/positive test (before vaccine)   | 6  | 6  | 0.99 (0.32, 3.07) | *                 | 0 | - | - | 0 | - | - |

|                                              |    |    |                    |                     |    |   |   |    |   |   |
|----------------------------------------------|----|----|--------------------|---------------------|----|---|---|----|---|---|
| Second dose/positive test (after vaccine)    | <5 | 0  | -                  | -                   | 0  | - | - | 0  | - | - |
| Third dose                                   | 0  | 0  | -                  | -                   | 0  | - | - | 0  | - | - |
| <b>Myocarditis</b>                           |    |    |                    |                     |    |   |   |    |   |   |
| First dose/positive test (before vaccine)    | <5 | 8  | 2.64 (0.70, 9.94)  | *                   | 0  | - | - | 0  | - | - |
| Second dose/positive test (after vaccine)    | <5 | 9  | 2.00 (0.50, 8.00)  | *                   | 0  | - | - | 0  | - | - |
| Third dose                                   | 0  | <5 | -                  | -                   | <5 | - | - | 0  | - | - |
| <b>Immune or idiopathic thrombocytopenia</b> |    |    |                    |                     |    |   |   |    |   |   |
| First dose/positive test (before vaccine)    | 17 | 12 | 0.64 (0.30, 1.35)  | 1.13 (0.33, 3.91)   | 0  | - | - | 0  | - | - |
| Second dose/positive test (after vaccine)    | 8  | 10 | 0.75 (0.26, 2.16)  | *                   | 0  | - | - | 0  | - | - |
| Third dose                                   | <5 | <5 | -                  | -                   | 0  | - | - | 0  | - | - |
| <b>Epilepsy</b>                              |    |    |                    |                     |    |   |   |    |   |   |
| First dose/positive test (before vaccine)    | 42 | 59 | 1.34 (0.90, 1.99)  | 1.32 (0.78, 2.24)   | 0  | - | - | 5  | * | * |
| Second dose/positive test (after vaccine)    | 22 | 51 | 1.77 (1.05, 2.99)  | 3.88 (1.27, 11.86)  | <5 | - | - | <5 | - | - |
| Third dose                                   | <5 | 11 | 2.67 (0.71, 10.05) | 1.00 (0.06, 15.99)  | <5 | - | - | 0  | - | - |
| <b>Acute pancreatitis</b>                    |    |    |                    |                     |    |   |   |    |   |   |
| First dose/positive test (before vaccine)    | 9  | 8  | 0.86 (0.33, 2.24)  | 6.78 (0.38, 122.00) | 0  | - | - | 0  | - | - |
| Second dose/positive test (after vaccine)    | 0  | <5 | -                  | -                   | 0  | - | - | 0  | - | - |
| Third dose                                   | 0  | <5 | -                  | -                   | 0  | - | - | 0  | - | - |
| <b>Myositis</b>                              |    |    |                    |                     |    |   |   |    |   |   |
| First dose/positive test (before vaccine)    | <5 | <5 | -                  | -                   | 0  | - | - | 0  | - | - |
| Second dose/positive test (after vaccine)    | <5 | 0  | -                  | -                   | 0  | - | - | 0  | - | - |
| Third dose                                   | 0  | 0  | -                  | -                   | 0  | - | - | 0  | - | - |
| <b>Acute disseminated encephalomyelitis</b>  |    |    |                    |                     |    |   |   |    |   |   |
| First dose/positive test (before vaccine)    | <5 | <5 | -                  | -                   | 0  | - | - | 0  | - | - |
| Second dose/positive test (after vaccine)    | 0  | <5 | -                  | -                   | 0  | - | - | 0  | - | - |
| Third dose                                   | <5 | 0  | -                  | -                   | 0  | - | - | 0  | - | - |
| <b>Demyelinating disease</b>                 |    |    |                    |                     |    |   |   |    |   |   |
| First dose/positive test (before vaccine)    | 0  | <5 | -                  | -                   | 0  | - | - | 0  | - | - |

|                                              |    |     |                    |                      |    |   |   |    |                      |                      |
|----------------------------------------------|----|-----|--------------------|----------------------|----|---|---|----|----------------------|----------------------|
| Second dose/positive test (after vaccine)    | 0  | <5  | -                  | -                    | 0  | - | - | 0  | -                    | -                    |
| Third dose                                   | 0  | <5  | -                  | -                    | 0  | - | - | 0  | -                    | -                    |
| <b>Appendicitis</b>                          |    |     |                    |                      |    |   |   |    |                      |                      |
| First dose/positive test (before vaccine)    | 88 | 136 | 1.37 (1.05, 1.80)  | 1.26 (0.94, 1.69)    | 0  | - | - | 0  | -                    | -                    |
| Second dose/positive test (after vaccine)    | 58 | 97  | 1.21 (0.85, 1.71)  | 1.07 (0.72, 1.59)    | 0  | - | - | 0  | -                    | -                    |
| Third dose                                   | 5  | 25  | 2.07 (0.72, 6.01)  | *                    | <5 | - | - | 0  | -                    | -                    |
| <b>Guillain-Barre syndrome</b>               |    |     |                    |                      |    |   |   |    |                      |                      |
| First dose/positive test (before vaccine)    | 0  | 0   | -                  | -                    | 0  | - | - | 0  | -                    | -                    |
| Second dose/positive test (after vaccine)    | 0  | 0   | -                  | -                    | 0  | - | - | 0  | -                    | -                    |
| Third dose                                   | 0  | 0   | -                  | -                    | 0  | - | - | 0  | -                    | -                    |
| <b>Angioedema</b>                            |    |     |                    |                      |    |   |   |    |                      |                      |
| First dose/positive test (before vaccine)    | <5 | 8   | 1.79 (0.53, 6.07)  | *                    | 0  | - | - | 0  | -                    | -                    |
| Second dose/positive test (after vaccine)    | <5 | <5  | -                  | -                    | 0  | - | - | <5 | -                    | -                    |
| Third dose                                   | <5 | <5  | -                  | -                    | 0  | - | - | 0  | -                    | -                    |
| <b>Anaphylaxis</b>                           |    |     |                    |                      |    |   |   |    |                      |                      |
| First dose/positive test (before vaccine)    | <5 | 16  | 3.71 (1.23, 11.14) | 14.17 (0.63, 316.28) | 0  | - | - | 0  | -                    | -                    |
| Second dose/positive test (after vaccine)    | <5 | 5   | 0.75 (0.17, 3.35)  | *                    | 0  | - | - | 0  | -                    | -                    |
| Third dose                                   | <5 | <5  | -                  | -                    | 0  | - | - | 0  | -                    | -                    |
| <b>18-24 years</b>                           |    |     |                    |                      |    |   |   |    |                      |                      |
| <b>Multisystem inflammatory syndrome</b>     |    |     |                    |                      |    |   |   |    |                      |                      |
| First dose/positive test (before vaccine)    | <5 | <5  | -                  | -                    | 0  | - | - | 0  | -                    | -                    |
| Second dose/positive test (after vaccine)    | <5 | <5  | -                  | -                    | 0  | - | - | <5 | -                    | -                    |
| Third dose                                   | 0  | 0   | -                  | -                    | 0  | - | - | 0  | -                    | -                    |
| <b>Myocarditis</b>                           |    |     |                    |                      |    |   |   |    |                      |                      |
| First dose/positive test (before vaccine)    | 8  | 9   | 2.36 (0.72, 7.68)  | *                    | <5 | - | - | 0  | -                    | -                    |
| Second dose/positive test (after vaccine)    | 6  | 14  | 1.67 (0.61, 4.60)  | *                    | 11 | * | * | <5 | -                    | -                    |
| Third dose                                   | 0  | 6   | *                  | *                    | <5 | - | - | 0  | -                    | -                    |
| <b>Immune or idiopathic thrombocytopenia</b> |    |     |                    |                      |    |   |   |    |                      |                      |
| First dose/positive test (before vaccine)    | 17 | 16  | 1.13 (0.54, 2.36)  | 1.22 (0.45, 3.30)    | <5 | - | - | 13 | 13.18 (1.72, 100.79) | 16.62 (1.27, 217.31) |

|                                             |     |     |                   |                    |    |                   |                      |    |                    |                    |
|---------------------------------------------|-----|-----|-------------------|--------------------|----|-------------------|----------------------|----|--------------------|--------------------|
| Second dose/positive test (after vaccine)   | 26  | 18  | 0.65 (0.34, 1.25) | 0.74 (0.31, 1.75)  | 0  | -                 | -                    | <5 | -                  | -                  |
| Third dose                                  | 8   | 5   | 0.50 (0.13, 2.00) | *                  | 0  | -                 | -                    | 0  | -                  | -                  |
| <b>Epilepsy</b>                             |     |     |                   |                    |    |                   |                      |    |                    |                    |
| First dose/positive test (before vaccine)   | 56  | 43  | 0.98 (0.63, 1.50) | 0.99 (0.58, 1.71)  | <5 | -                 | -                    | 59 | 5.25 (2.75, 10.00) | 4.20 (1.87, 9.42)  |
| Second dose/positive test (after vaccine)   | 43  | 48  | 1.08 (0.67, 1.74) | 1.06 (0.57, 1.97)  | <5 | -                 | -                    | 60 | 5.30 (2.61, 10.77) | 5.72 (2.32, 14.11) |
| Third dose                                  | 15  | 41  | 1.83 (0.93, 3.60) | 0.97 (0.30, 3.16)  | 10 | 1.50 (0.25, 8.98) | 7.50 (0.53, 105.95)  | 0  | -                  | -                  |
| <b>Acute pancreatitis</b>                   |     |     |                   |                    |    |                   |                      |    |                    |                    |
| First dose/positive test (before vaccine)   | 16  | 22  | 1.96 (0.94, 4.09) | 5.56 (1.30, 23.72) | 5  | 1.67 (0.40, 6.97) | 13.23 (1.26, 139.48) | <5 | -                  | -                  |
| Second dose/positive test (after vaccine)   | 9   | 17  | 2.19 (0.76, 6.30) | 6.26 (0.92, 42.50) | <5 | -                 | -                    | 9  | 2.79 (0.75, 10.35) | 2.18 (0.11, 44.14) |
| Third dose                                  | 5   | 9   | 0.50 (0.09, 2.73) | *                  | <5 | -                 | -                    | 0  | -                  | -                  |
| <b>Myositis</b>                             |     |     |                   |                    |    |                   |                      |    |                    |                    |
| First dose/positive test (before vaccine)   | <5  | <5  | -                 | -                  | 0  | -                 | -                    | <5 | -                  | -                  |
| Second dose/positive test (after vaccine)   | <5  | 0   | -                 | -                  | 0  | -                 | -                    | <5 | -                  | -                  |
| Third dose                                  | 0   | 0   | -                 | -                  | 0  | -                 | -                    | 0  | -                  | -                  |
| <b>Acute disseminated encephalomyelitis</b> |     |     |                   |                    |    |                   |                      |    |                    |                    |
| First dose/positive test (before vaccine)   | <5  | 7   | 2.01 (0.51, 7.87) | 3.38 (0.24, 47.13) | 0  | -                 | -                    | 0  | -                  | -                  |
| Second dose/positive test (after vaccine)   | <5  | <5  | -                 | -                  | 0  | -                 | -                    | <5 | -                  | -                  |
| Third dose                                  | 0   | 0   | -                 | -                  | <5 | -                 | -                    | 0  | -                  | -                  |
| <b>Demyelinating disease</b>                |     |     |                   |                    |    |                   |                      |    |                    |                    |
| First dose/positive test (before vaccine)   | 5   | <5  | -                 | -                  | 0  | -                 | -                    | 0  | -                  | -                  |
| Second dose/positive test (after vaccine)   | <5  | 5   | 1.65 (0.39, 6.91) | *                  | 0  | -                 | -                    | 0  | -                  | -                  |
| Third dose                                  | 0   | <5  | -                 | -                  | 0  | -                 | -                    | 0  | -                  | -                  |
| <b>Appendicitis</b>                         |     |     |                   |                    |    |                   |                      |    |                    |                    |
| First dose/positive test (before vaccine)   | 109 | 137 | 1.45 (1.11, 1.91) | 1.35 (1.02, 1.79)  | 20 | 2.27 (1.00, 5.19) | 2.56 (1.04, 6.32)    | 34 | 1.90 (1.04, 3.47)  | 1.93 (1.03, 3.60)  |
| Second dose/positive test (after vaccine)   | 61  | 119 | 2.06 (1.41, 3.00) | 1.89 (1.26, 2.83)  | 14 | 1.88 (0.70, 5.04) | 1.56 (0.52, 4.66)    | 27 | 1.56 (0.82, 2.96)  | 1.47 (0.74, 2.92)  |
| Third dose                                  | 17  | 63  | 2.58 (1.36, 4.88) | 3.81 (1.56, 9.29)  | 24 | 2.99 (0.97, 9.28) | 5.25 (1.22, 22.53)   | 0  | -                  | -                  |
| <b>Guillain-Barre syndrome</b>              |     |     |                   |                    |    |                   |                      |    |                    |                    |
| First dose/positive test (before vaccine)   | <5  | 0   | -                 | -                  | 0  | -                 | -                    | 0  | -                  | -                  |

|                                           |    |    |                   |                       |    |   |   |    |                    |                    |
|-------------------------------------------|----|----|-------------------|-----------------------|----|---|---|----|--------------------|--------------------|
| Second dose/positive test (after vaccine) | 0  | <5 | -                 | -                     | 0  | - | - | 0  | -                  | -                  |
| Third dose                                | <5 | 0  | -                 | -                     | 0  | - | - | 0  | -                  | -                  |
| <b>Angioedema</b>                         |    |    |                   |                       |    |   |   |    |                    |                    |
| First dose/positive test (before vaccine) | 9  | 7  | 0.68 (0.22, 2.07) | 25.89 (0.24, 2768.04) | <5 | - | - | <5 | -                  | -                  |
| Second dose/positive test (after vaccine) | <5 | 7  | 2.00 (0.50, 8.00) | *                     | 0  | - | - | <5 | -                  | -                  |
| Third dose                                | <5 | <5 | -                 | -                     | <5 | - | - | 0  | -                  | -                  |
| <b>Anaphylaxis</b>                        |    |    |                   |                       |    |   |   |    |                    |                    |
| First dose/positive test (before vaccine) | 8  | 8  | 1.24 (0.43, 3.61) | 1.45 (0.28, 7.61)     | 0  | - | - | 7  | 6.14 (0.75, 50.40) | 5.86 (0.37, 93.30) |
| Second dose/positive test (after vaccine) | 6  | 9  | 1.67 (0.40, 6.97) | *                     | <5 | - | - | 6  | *                  | *                  |
| Third dose                                | <5 | 7  | 1.33 (0.30, 5.96) | *                     | <5 | - | - | 0  | -                  | -                  |
